# Supplementary material for: Utilising a multi-proxy to model comparison to constrain the season and regionally heterogeneous impacts of the Mt Samalas 1257 eruption
Source: Copernicus journal article supplement (doi:10.5194/cp-20-951-2024), 2024-04-16
Supplement: Supplementary file 1 [file cp-20-951-2024-supplement.zip]

Archive with 4 entries (4 files):
- Supplementary Sheet S2.xlsx
- cp-20-951-2024-supplement-title-page.pdf
- Supplementary Document CP Revised.pdf
- Supplementary Sheet S1.xlsx
