# Supplementary material for: Utilising a multi-proxy to model comparison to constrain the season and regionally heterogeneous impacts of the Mt Samalas 1257 eruption
Source: Copernicus journal article supplement (doi:10.5194/cp-20-951-2024), 2024-04-16
Supplement: Supplementary file 1 [file cp-20-951-2024-supplement.zip › cp-20-951-2024-supplement-title-page.pdf]

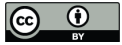

*Supplement of*

**Utilising a multi-proxy to model comparison to constrain the season and regionally heterogeneous impacts of the Mt Samalas 1257 eruption**

**Laura Wainman et al.**

*Correspondence to:* Laura Wainman (eelrw@leeds.ac.uk)

- cp-20-951-2024-supplement-title-page.pdf
- Supplementary Document CP Revised.pdf
- Supplementary Sheet S1.xlsx
- Supplementary Sheet S2.xlsx

The copyright of individual parts of the supplement might differ from the article licence.
