# Supplementary material for: Utilising a multi-proxy to model comparison to constrain the season and regionally heterogeneous impacts of the Mt Samalas 1257 eruption
Source: Copernicus journal article supplement (doi:10.5194/cp-20-951-2024), 2024-04-16
Supplement: Supplementary file 1 [file cp-20-951-2024-supplement.zip › Supplementary Sheet S1.xlsx]

## Sheet: README
File includes data incorporated into the globally-resolved mutli-proxy database for 1258-59
1 - Meta Data
Meta Data and Study Details overview for all data sources, split by data type - Tree Rings, Ice Cores, Lake Sediments, and Historical Records
(Resolution, Timespan, Lat/Long, Summer Definition, Online Resource Link)
2 - 1258-1259
Summer SAT anomalies for 1258 and 1259, as shown in Figure X
Anomalies are calculated relative to the 10-year pre-eruption average
Blue shading denotes negative (cold) SAT anomalies and red shading denotes positive (warm) SAT anomalies
3 - Full Data Sets
Where available complete data sets for the full length of incorporated records (from AD 0 to AD 2011) are included here for additional reference

## Sheet: 1 - Meta Data
Tree Rings
Short Reference	Parameter	Season	Temperature Proxy	Location	Lat	Long	Resolution	Earliest (AD)	Latest (AD)	Reference	Online Resource
T_1	TRW	Nov-April	SAT	Australia (Tasmania)	-41.8	145.5	Annual	0	1991	Cook et al., 2000	https://www.ncei.noaa.gov/access/paleo-search/study/6240
T_2	TRW	Nov-April	SAT	New Zealand (Oroko Swamp)	-43.2	170.3	Annual	900	1999	Cook et al., 2006	https://www.ncei.noaa.gov/access/paleo-search/study/1003986
T_3	TRW, MXD, CWT	Summer	SAT Anomaly	Siberia (NE Yakutia)	69	148	Annual	1258	1259	Churakova et al., 2019	https://cp.copernicus.org/articles/15/685/2019/
T_4	TRW, MXD, CWT	Summer	SAT Anomaly	Siberia (E Taimyr)	70	103	Annual	1258	1259	Churakova et al., 2019	https://cp.copernicus.org/articles/15/685/2019/
T_5	TRW, MXD, CWT + Frost Rings	Summer	SAT Anomaly	Siberia (Russian Altai)	50	89	Annual	1258	1259	Churakova et al., 2019	https://cp.copernicus.org/articles/15/685/2019/
T_6	TRW, MXD	June-July	SAT Anomaly	Siberia (Yamalia, Polar Urals)	66.8	68.4	Annual	0	2005	Briffa et al., 2013	https://www.ncei.noaa.gov/access/paleo-search/study/14468
T_7	Frost Rings	Summer	Frost Rings	Siberia (Yamalia, Polar Urals)	66.5	65.5	Annual	1258	1259	Hantemirov et al., 2004	https://www.sciencedirect.com/science/article/abs/pii/S0031018204001051
T_8	TRW	Jun-Aug	SAT Anomaly	NE Tibetan Plateu	33.7	96.5	Annual	1000	2002	Xu et al., 2019	https://www.ncei.noaa.gov/access/paleo-search/study/27290
T_9	TRW	Summer	SAT Minimum	China (Qilian Mountains)	38.7	99.7	Annual	1259	1260	Zhang et al., 2014	https://cp.copernicus.org/articles/10/1763/2014/
T_10	Frost Rings	Summer	Frost Rings	Mongolia	48.5	99	Annual	1258	1259	D’Arrigo et al., 2001	https://link.springer.com/article/10.1023/A:1010727122905
T_11	TRW	June-July	SAT	Northern Mongolia	49.9	91.3	Annual	931	2005	Davi et al., 2015	https://www.ncei.noaa.gov/access/paleo-search/study/20650
T_12	TRW, MXD	May-Aug	SAT	Sweden (Torneträsk)	68.2	19.5	Annual	0	2010	Melvin et al.,2012	https://www.ncei.noaa.gov/access/paleo-search/study/17175
T_13	MXD	April-Sept	SAT Anomaly	Central Scandinavia	62	14.1	Annual	850	2011	Zhang et al., 2016	https://www.ncei.noaa.gov/access/paleo-search/study/20429
T_14	Mixed	Jun-Aug	SAT	Fennoscanndia	68.6	24.6	Annual	800	2005	McCarroll et al., 2013	https://www.ncei.noaa.gov/access/paleo-search/study/19943
T_15	TRW	Jun-Aug	SAT Anomaly	Central Europe	49	13	Annual	0	2003	Büntgen et al., 2011	https://www.ncei.noaa.gov/access/paleo-search/study/10394
T_16	TRW	May-June	SAT Anomaly	Eastern Europe	48.5	19.5	Annual	1040	2011	Büntgen et al., 2013	https://www.ncei.noaa.gov/access/paleo-search/study/13669
T_17	TRW, MXD	March-Aug	SAT	USA (Upper Missouri River Basin)	43.3	-108	Annual	800	2011	Martin et al., 2020	https://www.ncei.noaa.gov/access/paleo-search/study/29413
T_18	TRW	Feb-Aug	SAT	Gulf of Alaska	59.5	-140.5	Annual	800	2010	Wiles et al., 2014	https://www.ncei.noaa.gov/access/paleo-search/study/16015
T_19	TRW	July-Aug	SAT Anomaly	Quebec	57.3	-74	Annual	910	2011	Gennaretti et al., 2014	https://www.ncei.noaa.gov/access/paleo-search/study/16558
T_20	TRW, MXD	May-Aug	SAT Maximum	Canadian Rockies	52.3	-117.3	Annual	950	1994	Luckman et al., 2005	https://www.ncei.noaa.gov/access/paleo-search/study/6395
T_21	TRW	Feb-May	SAT Anomaly	Novgorod, Russia	58.6	31.3	Annual	1160	1989	Helama et al., 2017	https://www.ncdc.noaa.gov/paleo/study/22890
T_22	TRW	July-Aug	SAT Anomaly	North Cairngorms, Scotland	57.2	-3.73	Annual	1200	2010	Rydval et al., 2018	https://www.ncdc.noaa.gov/paleo/study/24770
T_23	TRW	June-July	SAT Minimum	McKenzie Delta, Canada	68.6	-133.9	Annual	1245	2007	Porter et al., 2016	https://www.ncdc.noaa.gov/paleo/study/20652
T_24	TRW, BI	Jun-Aug	SAT	Western Mongolia	49.9	91.3	Annual	1178	2004	Davi et al., 2021	https://www.ncdc.noaa.gov/paleo/study/33614
Ice Cores
Short Reference	Data Type	Proxy Details		Location	Lat	Long	Resolution	Earliest (AD)	Latest (AD)	Reference	Online Resource
I_1	d18O	SAT		Greenland (GRIP, CRETE, DYE3)	69	39	Annual	1258	1259	Guillet et al., 2017, Vinther et al., 2010	https://www.nature.com/articles/ngeo2875
I_2	d18O	SAT		Greenland (NGT B18)	76.62	-36.4	Annual	871	1992	Fischer et al., 1998	https://www1.ncdc.noaa.gov/pub/data/paleo/pages2k/pages2k-temperature-v2-2017/data-current-version/Arc-NGTB18.Schwager.1998.txt
I_3	d18O	SAT		Greenland (NGRIP1)	75.1	-42.32	Annual	0	1995	Vinther et al., 2006	https://www1.ncdc.noaa.gov/pub/data/paleo/pages2k/pages2k-temperature-v2-2017/data-current-version/Arc-NGRIP1.Vinther.2006.txt
I_4	d18O	SAT		Antarctica (Law Dome)	-66.73	112.83	Annual	173	1995	Plummer et al., 2012	https://www.ncei.noaa.gov/pub/data/paleo/icecore/antarctica/law/law2012d18o.txt
I_5	d18O	SAT		Antarctica (WDC05A)	-79.47	-112.13	Annual	786	2005	Steig et al., 2013	https://www1.ncdc.noaa.gov/pub/data/paleo/pages2k/pages2k-temperature-v2-2017/data-current-version/Ant-WDC05A.Steig.2013.txt
I_6	d18O	SAT		Antarctica (Berkner Island)	-79.57	-45.72	Annual	1000	1992	Mulvaney et al., 2002	https://www1.ncdc.noaa.gov/pub/data/paleo/pages2k/pages2k-temperature-v2-2017/data-current-version/Ant-BerknerIsland.Mulvaney.2002.txt
I_7	d18O	SAT		Antarctica (DML05)	-75	-0.01	Annual	166	1996	Graf et al., 2002	https://www1.ncdc.noaa.gov/pub/data/paleo/pages2k/pages2k-temperature-v2-2017/data-current-version/Ant-SiteDML05.Graf.2002.txt
Historical Sources
Short Reference	Data Type	Chronicle Name		Location				Reference			Online Resource
H_1	Medieval Chronicle	Azuma Kagami		Japan				Farris, 2006			https://www.cambridge.org/core/journals/international-journal-of-asian-studies/article/abs/japans-medieval-population-famine-fertility-and-warfare-in-a-transformative-age-by-william-wayne-farris-honolulu-university-of-hawaii-press-2006-pp-372-isbn-10-082482973513-9780824829735-4800/EAAB40B4198FB0E27C6D83DE45A0BC3D
H_2	Medieval Chronicles	Mutiple Chonicles and Annals		Western Europe (England, France, Germany)				Guillet et al., 2017, Stothers, 2000			https://www.nature.com/articles/ngeo2875, https://link.springer.com/article/10.1023/A:1005523330643
H_3	Medieval Chronicle	Russian Annals		Altai Mountains, Russia				Guillet et al., 2017, Borisenkov and Pasetsky, 1988			https://www.nature.com/articles/ngeo2875
H_4	Medieval Chronicle	Þorgils Saga Skarða		Iceland				Bierstedt, 2019			https://www.academia.edu/45128500/Weather_and_Ideology_in_%C3%8Dslendinga_saga_A_Case_Study_of_the_Volcanic_Climate_Forcing_of_the_1257_Samalas_eruption
H_5	Medieval Chronicle	Chronicle of Novgorod		Novgorod, Russia				Stothers, 2000			https://link.springer.com/article/10.1023/A:1005523330643
H_6	Medieval Chronicle	Annales Ianuenses		Genoa, Italy				Guillet et al., 2017			https://www.nature.com/articles/ngeo2875
H_7	Medieval Chronicle	Chronicle of the Abbey of St. Edmunds		Suffolk, England				Stothers, 2000			https://link.springer.com/article/10.1023/A:1005523330643

## Sheet: 2 -1258-59
Tree Rings
Short Reference	Location	Lat	Long	1258	1259
T_1	Australia (Tasmania)	-41.8	145.5	-0.389727	-0.365727
T_2	New Zealand (Oroko Swamp)	-43.2	170.3	-0.741818	-0.0608182
T_3	Siberia (NE Yakutia)	69	148	Negative Anomaly	Negative Anomaly
T_4	Siberia (E Taimyr)	70	103	Negative Anomaly	Negative Anomaly
T_5	Siberia (Russian Altai)	50	89	Negative Anomaly	Negative Anomaly + Frost Ring
T_6	Siberia (Yamalia, Polar Urals)	66.8	68.4	-2.7062	-4.4052
T_7	Siberia (Yamalia, Polar Urals)	66.5	65.5	Frost and Light Rings	Frost and Light Rings
T_8	NE Tibetan Plateu	33.7	96.5	-0.49788	-0.301521
T_9	Mongolia	48.5	99	Frost Rings	Frost Rings
T_10	Northern Mongolia	49.9	91.3	-1.13355	-2.38955
T_11	Sweden (Torneträsk)	68.2	19.5	0.208727	-0.690273
T_12	Central Scandinavia	62	14.1	-0.656364	-0.406364
T_13	Fennoscanndia	68.6	24.6	-0.0563636	-0.936364
T_14	Central Europe	49	13	-0.367727	0.163273
T_15	Eastern Europe	48.5	19.5	-0.144419	-1.04292
T_16	USA (Upper Missouri River Basin)	43.3	-108	-0.525983	0.781317
T_17	Gulf of Alaska	59.5	-140.5	0.960273	0.725273
T_18	Quebec	57.3	-74	0.0907358	-2.64757
T_19	Canadian Rockies	52.3	-117.3	-1.67182	0.288182
T_20	Novgorod, Russia	58.6	31.3	-0.721818	0.618182
T_21	North Cairngorms, Scotland	57.2	-3.73	-0.154973	0.406827
T_22	McKenzie Delta, Canada	68.6	-133.9	-0.718182	0.0118182
T_23	Western Mongolia	49.9	91.3	-1.12472	-0.207632
Ice Cores
Short Reference	Location	Lat	Long
I_1	Greenland (GRIP, CRETE, DYE3)	69	39	-0.1	\
I_2	Greenland (NGT B18)	76.62	-36.4	0.085	0.021
I_3	Greenland (NGRIP1)	75.1	-42.32	0.017	-0.009
I_4	Antarctica (Law Dome)	-66.73	112.83	-0.037	0.16
I_5	Antarctica (WDC05A)	-79.47	-112.13	-0.039	-0.033
I_6	Antarctica (Berkner Island)	-79.57	-45.72	-0.056	-0.13
I_7	Antarctica (DML05)	-75	-0.01	-0.11	-0.099
Historical Sources
Short Reference	Location
H_1	Japan			Wet and cold summer accompaniedby heavy rain and strong winds
H_2	Western Europe (England, France, Germany)			References to unusually cold springtime, summer, and Autumn as well as increased rainfall	References to warmer temperatures and dry weather
H_3	Altai Mountains, Russia				Reference to abnormal July snowfall
H_4	Iceland			Reference to a harsh Springtime
H_5	Novgorod, Russia				Reference to an odd frosty day during April 1259
H_6	Genoa, Italy				Reference to an unusually dark lunar eclipse on the 12 November 1258
H_7	Suffolk, England			Reference to an unusually dark lunar eclipse on the 18 May 1258

## Sheet: 3 - Full Tree Ring Data Sets
	T_1	T_2	T_6	T_8	T_11	T_12	T_13	T_14	T_15	T_16	T_17	T_18	T_19	T_20	T_21	T_22	T_23	T_24
	Tasmania	Oroko Swamp	Polar Urals	Tibetan Plateu	Northern Mongolia	Torneträsk	Central Scandinavia	Fennoscanndia	Central Europe	Eastern Europe	Missouri River Basin	Gulf of Alaska	Quebec	Canadian Rockies	Novgorod	North Caingorms	McKenzie Delta	Western Mongolia
2011							1.65			2.90613	8.5667		13.9872
2010						11.576	0.6			0.686064	8.8104	8.38	13.894			1.4306
2009						12.148	0.9			0.788555	8.5872	7.808	12.4643			1.1973
2008						10.793	0.99			1.80492	8.4995	6.85	13.6735			0.5823
2007						10.966	1.33			0.355247	10.906	6.996	13.5838			0.2273	6.76
2006						10.959	0.72			-0.525603	10.229	7.755	13.448			0.6621	8.23
2005			0.064		18.016	10.795	0.01	11.85		0.0472057	9.3191	8.337	13.7315			0.5296	7.15
2004			2.716		19.194	10.907	0.44	11.56		-1.11606	9.6636	8.412	12.7984			0.3237	8.01	13.4082
2003			2.966		19.206	12.13	0.96	12.13	4.008	0.449766	10.267	7.577	13.3087			1.4109	7.38	12.8438
2002			0.452	1.67769	18.432	11.005	0.51	11.86	2.127	1.15411	8.4981	7.27	12.7468			0.7809	7.29	12.4354
2001			-0.778	1.29353	18.016	10.965	-0.2	11.38	2.896	-0.474927	10.05	7.377	13.0058			0.1975	6.92	13.9533
2000			1.238	0.902093	18.564	10.79	-0.4	12.1	1.631	1.13759	10.159	7.229	12.6434			1.0228	7.87	12.088
1999		17.233	0.753	1.52619	17.25	10.431	0.27	11.31	1.273	0.836953	8.8359	7.808	12.879			0.9471	7.58	11.9032
1998		15.767	2.05	0.837934	17.176	10.645	-0.44	11.34	2.688	0.989551	9.0829	7.96	12.5423			-0.1306	7.48	13.6439
1997		15	-2.854	0.861361	16.99	10.345	0.64	11.98	-0.067	0.647346	8.7163	8.289	12.526			0.9858	7.35	12.4048
1996		16.1	2.251	0.956365	17.456	9.979	-0.13	11.22	0.033	-0.993075	8.5512	7.801	12.2164			-0.0217	7.28	13.1577
1995		15.3	0.43	0.12345	17.11	9.872	-0.1	10.36	1.834	-1.31763	7.9055	8.161	12.0904			-0.1594	6.72	11.6589
1994		15.4	1.608	0.711192	17.925	10.268	0.45	11.87	1.963	-1.09101	9.9089	8.261	11.3514	0.52		-0.2159	6.27	12.0141
1993		13.8	1.382	0.995539	16.978	10.485	-0.17	11.48	1.105	-0.251726	7.9726	7.84	12.7089	-1.17		-0.1228	6.45	10.2944
1992		13.7	1.856	0.477869	16.953	10.163	-0.34	10.66	0.846	-1.11492	9.6728	7.94	10.9189	-0.38		0.5595	6.99	11.7957
1991	15.667	15.1	1.402	1.05697	17.279	10.35	0.31	11.11	0.653	-0.882043	8.8809	7.892	11.1556	-0.36		1.1563	5.96	13.4745
1990	15.453	15.767	0.792	0.964738	17.106	10.571	0.34	11.83	-0.062	-0.526742	9.0593	8.143	12.2772	0.51		1.2809	6.45	12.3281
1989	15.822	16.833	2.437	0.904043	16.735	10.471	0.53	11.83	-0.032	-0.485177	8.7984	7.698	11.6127	0.44	0.93	0.6574	6.41	11.3493
1988	15.625	14.9	1.127	0.874783	15.499	10.67	0.52	11.6	1.323	-0.66055	10.13	7.648	12.7174	0.71	1.45	0.3876	6.26	10.6261
1987	15.322	15.333	1.397	0.648909	16.175	10.361	-0.89	10.66	0.286	-0.753361	9.4752	7.616	11.4228	0.48	-0.46	0.4932	6.38	11.5121
1986	15.712	16.033	0.708	0.391425	17.489	10.498	-0.16	11.44	0.425	2.20407	9.785	7.888	12.2158	0.34	-0.91	-0.2922	6.76	11.6736
1985	15.186	15.467	0.015	0.494732	16.706	10.806	-0.35	12.28	0.534	-0.5945	9.2869	7.799	12.4201	0.35	-0.74	-0.3035	6.39	10.6951
1984	15.392	15.667	2.93	0.354558	17.662	9.893	-0.4	10.92	-0.007	-0.804606	8.7735	8.236	11.7032	0.78	-0.43	0.591	6.32	10.4801
1983	15.516	13.733	1.981	0.446411	16.257	10.097	-0.34	11.42	0.976	0.99923	8.5553	8.282	11.3372	0.7	-0.39	0.7931	6.35	10.3309
1982	15.296	15.1	1.278	0.377654	16.546	9.874	-0.11	10.66	1.045	2.1756	8.5184	8.259	11.399	0.07	-1.5	0.9471	7.1	11.2725
1981	16.013	15.867	-0.501	0.503326	16.686	9.954	-0.23	10.51	-0.742	2.10955	8.5864	8.706	11.6532	-0.38	-0.46	1.2756	6.25	12.0659
1980	15.219	14.967	-2.459	0.551742	17.806	10.518	0.41	12.21	-0.687	-0.0974201	7.7533	8.733	12.497	-0.79	-1.12	0.2733	6.28	12.1616
1979	15.728	15.033	1.473	0.231282	17.044	10.584	-0.51	11.89	-0.404	1.11311	9.1429	8.011	12.8154	0.4	-0.08	-0.3161	6.18	12.1322
1978	15.378	15.633	1.22	0.164661	16.447	10.236	-0.09	10.67	-0.806	-0.283612	8.163	7.799	12.1588	0.15	1.52	-0.1001	6.57	11.4478
1977	15.333	14.9	0.076	0.628691	16.673	10.338	-0.61	10.99	-0.717	-0.442472	9.2838	7.986	11.5428	0.2	-1.2	-0.521	6	11.6295
1976	14.978	14.467	0.441	0.00509704	17.242	10.557	0.34	11.21	-0.613	-0.440195	7.3852	6.861	11.1323	-1.38	0.02	0.4477	6.46	11.2515
1975	15.411	16.9	-2.515	0.505405	16.789	10.004	0.57	10.51	-2.235	-0.130445	7.1857	6.791	11.0101	-0.35	1.13	0.6954	6.66	12.1395
1974	15.705	15.667	0.401	0.132365	16.488	10.132	-0.04	11.6	-0.791	-2.29926	7.6149	6.597	11.2211	-0.55	0.06	-0.2526	5.73	12.5274
1973	15.688	14.6	-1.588	0.522341	16.5	10.759	0.15	11.75	-0.737	-0.183398	8.9055	5.824	12.161	0.16	0.05	-0.0516	6.35	11.6222
1972	15.294	15.5	-0.623	0.454239	16.385	10.412	0.59	11.65	-0.364	0.301724	8.4546	6.572	12.2738	-0.01	0.4	-0.0095	6.37	11.1957
1971	16.013	17.233	-2.422	0.157352	15.928	10.108	-0.8	10.67	1.05	0.726491	8.5111	6.912	11.2201	0.1	-0.03	0.4359	5.88	10.5298
1970	15.45	16.333	-1.236	0.41656	16.171	10.388	-0.24	11.85	0.827	1.45645	9.3495	6.681	12.3684	1.09	1.81	-0.5552	6.12	11.4478
1969	15.371	14.533	0.313	0.213525	16.842	10.4	-0.06	11.17	0.98	1.53104	9.1379	7.589	12.5073	0.24	-1.71	0.2237	5.95	11.8878
1968	15.565	15.033	-1.688	-0.0674509	16.298	10.316	0.17	9.79	-0.171	0.356386	6.0641	7.691	11.6176	-1.1	-1.05	-0.2015	6.14	11.7649
1967	15.238	15.033	-0.23	0.0818834	16.294	10.341	0.32	11.12	-0.022	0.409339	8.797	7.311	12.6935	1.38	0.86	0.4231	5.75	11.1887
1966	14.918	16.033	-0.401	0.110696	16.41	10.211	-0.12	10.7	-0.99	0.830121	9.0605	8.216	11.9284	-1.26	0.02	0.0664	6.15	11.8802
1965	14.799	15.1	3.187	0.538987	16.624	10.018	0	9.78	-1.148	-0.956634	8.0671	8.163	11.7959	0.56	-0.41	-0.9529	6.52	12.3588
1964	14.71	14.167	2.576	0.497716	17.192	11.195	0.07	11.58	-0.791	0.65247	6.7159	7.997	12.3507	-0.87	-0.41	0.0832	5.64	11.6736
1963	14.822	15.1	1.001	0.136724	16.08	9.861	0.36	10.27	-1.084	0.0967429	10.126	8.318	12.2355	-0.05	-0.74	-0.5761	5.85	12.1837
1962	14.866	15.567	-0.425	-0.180239	16.331	10.401	-0.88	10	-0.26	-1.30966	8.0709	7.555	12.669	-1.3	-0.16	-1.2245	5.84	11.5781
1961	15.231	15.333	0.268	0.15975	15.66	10.573	-0.2	11.2	-0.96	0.864854	9.9521	8.122	12.1456	0.34	0.15	-0.6985	6.24	9.80131
1960	15.07	15.067	-1.097	0.135102	16.595	11.279	0.28	12.71	-0.861	0.245354	9.4978	7.614	11.7575	0.35	-0.44	-0.637	6.4	11.2655
1959	15.032	15.4	-0.545	0.652137	17.452	10.697	1.18	11.68	-0.697	0.088202	8.0336	7.712	11.9858	-1.35	0	0.9588	5.84	11.5781
1958	14.539	15.7	-0.811	0.516749	16.154	10.175	-0.33	11.33	0.142	0.264144	9.5748	7.748	11.2937	0.93	-1.71	-0.4857	6.45	9.58589
1957	14.745	14.706	0.306	0.549886	17.349	10.579	0.06	11.86	-1.377	0.0893408	8.1227	7.477	12.061	-0.85	0.71	-0.4272	5.74	11.2655
1956	15.205	14.927	2.67	0.577567	16.719	10.121	-0.18	10.9	-1.129	-0.0735056	8.9999	6.782	11.5254	0.88	-2.47	-1.2296	5.99	10.908
1955	15.02	14.517	0.985	0.638908	17.003	10.311	0.68	11.2	-0.622	-0.26596	9.1603	7.276	11.3675	0.65	-0.15	0.8617	5.94	11.5634
1954	14.936	14.168	0.23	0.669092	17.489	11.039	0.19	12.27	0.072	-1.32161	7.5651	7.436	11.8746	-0.86	-0.18	-0.7775	6.37	11.3353
1953	14.476	14.637	1.508	0.356533	17.707	10.93	0.43	12.03	0.157	-1.54368	8.5475	8.027	11.4429	-0.3	-0.82	0.7599	5.74	11.5707
1952	14.201	14.112	0.066	0.292284	16.554	10.1	-0.31	11.1	1.616	-2.4251	8.7515	7.112	12.5017	0.23	-0.73	0.491	5.8	10.385
1951	15.168	15.143	0.368	0.223618	17.019	10.424	0.58	11.45	1.616	-1.09784	7.1805	7.591	11.7512	-0.38	0.23	-0.1899	5.62	11.6736
1950	14.67	14.674	-1.499	0.382713	17.011	10.65	0.85	12.26	0.941	-1.12005	8.7397	7.381	11.9078	0.95	0.43	0.1996	6.06	11.2166
1949	14.74	14.802	-2.004	0.513227	16.546	10.536	-0.11	10.82	0.757	-1.70539	9.1763	6.595	11.2172	-0.03	0.29	1.2765	5.26	11.5781
1948	15.116	14.963	0.132	0.72973	17.023	10.737	0.97	11.63	-0.89	-2.85328	8.4642	6.964	12.2156	0.65	0.34	0.0983	5.96	12.4201
1947	14.887	14.145	-3.615	0.423956	16.389	10.819	1.36	11.81	0.896	-1.53286	8.2687	7.14	11.7231	-0.27	0.18	1.1126	5.53	11.6663
1946	14.301	14.117	-2.674	0.814221	17.629	10.71	0.96	11.52	0.315	0.261867	8.4972	7.634	11.9033	0.08	-0.38	-0.3507	5.72	11.9697
1945	14.495	14.214	-0.115	0.203447	16.051	11.273	0.35	11.84	-0.101	-0.798912	8.5556	7.625	11.1858	0.65	1.5	1.2432	5.95	12.6934
1944	14.925	15.203	-1.24	0.375862	17.283	11.15	-0.06	11.26	0.251	-1.58126	8.1383	7.6	11.6848	-0.42	-0.15	0.4178	5.81	12.088
1943	14.743	14.411	0.596	0.738067	16.574	11.015	0.61	11.62	0.142	-2.17286	7.6153	7.915	11.4383	-0.48	1.52	0.5406	5.74	11.6369
1942	14.885	14.605	1.942	0.716377	15.973	10.771	0.19	11.54	-0.593	-2.12275	8.8622	8.471	11.9786	-0.06	-1.17	-0.1913	5.6	11.4335
1941	14.838	14.752	-2.542	0.321803	17.172	11.421	-0.03	12.06	-0.498	-1.80958	8.5365	8.006	12.0539	0.53	-0.39	-0.4275	5.71	11.8033
1940	15.434	13.951	0.749	0.334644	16.574	10.329	0.44	11.26	-0.608	-1.82553	9.8534	7.311	11.2742	0.34	-0.3	-0.3601	5.39	11.2795
1939	15.639	13.96	3.156	0.228435	16.393	10.555	0.74	11.98	0.132	-1.694	9.4284	7.504	11.3717	0.01	-1	0.1266	5.46	11.5267
1938	14.92	14.697	2.349	0.198485	16.336	11.119	0.46	12.3	0.464	-0.855851	9.5599	7.206	11.8001	0.23	-0.3	0.7747	5.58	10.735
1937	15.013	13.482	0.999	-0.097631	15.895	11.286	1.22	13.29	-0.171	-0.590514	8.8542	7.151	12.1572	-0.96	0.97	0.3787	5.95	11.1678
1936	15.14	14.218	-0.603	0.0126067	15.862	9.492	0.31	11.25	-0.077	-0.177704	9.9159	7.792	11.2447	1.37	0.05	0.1838	5.7	11.2306
1935	14.859	15.106	-0.859	0.15751	16.925	9.913	-0.64	11.18	0.196	-0.967452	8.1612	8.008	12.5336	-0.44	-0.33	0.5623	6.05	11.7112
1934	14.712	14.816	-2.911	-0.235002	16.583	11.042	0.86	12.71	-0.687	-1.68546	9.4878	7.874	11.4399	-0.31	0.34	0.4896	5.73	11.6295
1933	14.743	15.442	-0.667	0.0986818	16.451	10.212	0.36	11.51	-0.677	-2.19165	9.5833	7.694	10.3891	0.34	-0.73	1.2109	5.63	10.6497
1932	14.789	14.531	-3.259	-0.105575	16.323	9.981	-0.12	11.38	0.355	-1.27492	9.4318	7.263	11.6273	0.1	0.33	-0.0772	5.49	10.0581
1931	14.392	14.168	-1.212	0.0294382	16.196	10.264	-0.64	11.15	0.846	-1.41556	10.084	8.209	11.7908	-0.11	-0.14	-0.5549	5.54	10.7916
1930	14.5	14.623	-1.679	-0.189535	16.686	11.11	0.99	12.35	-0.364	-2.12617	8.9537	8.517	12.1982	0.13	0.37	-0.8067	5.83	11.9771
1929	14.271	14.609	0.16	-0.370115	16.492	9.509	-0.59	10.12	0.276	-1.44403	9.5168	7.897	10.8318	-0.27	-0.38	-0.0806	5.62	11.3283
1928	14.869	16.496	1.265	-0.605112	16.06	9.424	-0.81	10.48	0.291	-1.16959	8.6911	7.744	11.633	0.22	-0.15	-0.3042	5.86	11.8878
1927	14.635	15.309	-0.493	-0.150663	15.915	10.386	-0.08	12.15	0.082	-0.418558	7.3829	8.334	10.9472	-0.09	0.06	-0.6675	5.98	10.544
1926	14.792	14.89	0.873	-0.374556	16.163	10.239	0.04	11.44	-1.65	-0.6503	8.5318	8.747	9.64826	-0.09	-0.51	0.7895	5.74	11.2096
1925	14.404	15.037	0.319	-0.311477	15.932	10.839	0.7	12.16	-0.508	-0.448735	8.2182	7.826	10.4086	1.15	0.45	0.3416	5.57	10.6879
1924	14.546	15.925	2.42	0.342405	16.611	10.51	0.37	12.13	0.112	0.0830774	8.5417	8.307	11.6089	-0.41	-0.31	-0.4471	5.65	11.534
1923	14.579	14.646	3.046	-0.187117	15.87	10.425	-0.93	10.26	-0.558	-1.28631	7.4968	8.357	10.2243	-0.08	-0.61	-0.6566	5.93	10.2731
1922	15.116	15.401	1.959	0.130353	17.032	10.673	-0.05	12.19	-0.667	-1.18325	9.1117	7.732	11.1601	0.08	0.72	-1.5043	5.48	11.9403
1921	15.329	14.729	2.022	0.19478	17.246	10.113	-0.24	11.36	-0.493	-1.01471	8.2577	8.02	10.9992	-0.45	0.36	0.1226	5.5	11.2725
1920	15.495	14.149	-0.16	0.229027	16.385	10.184	0.05	11.78	-1.893	-0.355924	6.8621	7.894	10.9955	0.01		-0.4203	5.26	11.3423
1919	15.186	14.131	-1.696	-0.319464	15.998	10.057	-0.2	11.08	-1.287	-1.61713	8.991	6.893	12.483	0.17		0.0855	5.64	10.7512
1918	15.093	14.545	0.741	-0.786784	16.183	10.324	0.27	10.98	-1.665	-2.07037	7.8841	7.84	10.8318	-0.2		0.2409	5.3	11.0769
1917	14.866	14.881	0.726	-0.248486	15.833	9.497	0.1	10.68	-0.25	-1.5266	7.7134	7.073	11.7896	-0.2		0.2409	5.49	10.735
1916	14.885	16.063	-1.175	-0.136145	15.528	10.031	-0.4	10.68	-1.804	-0.912791	7.538	7.84	11.6906	-0.31		-0.3613	5.5	11.7573
1915	15.179	14.798	1.614	0.159607	15.924	10.074	-0.8	10.62	-1.362	-0.994214	7.0699	8.87	11.5036	-0.54		-0.871	5.49	10.84
1914	14.353	15.442	-2.314	-0.0184765	15.174	9.919	0.01	10.58	-1.362	-1.2772	8.9852	8.104	12.0314	0.25		0.2209	5.39	10.5227
1913	14.388	14.416	-0.785	0.125287	14.552	9.4	-0.78	10.36	-2.285	-1.77485	7.9138	7.657	10.8346	-0.47		-0.3955	5.51	9.71078
1912	14.317	13.698	-2.642	-0.169415	14.49	9.449	-0.64	10.33	-0.047	-0.667382	7.8499	7.409	10.2377	-0.32		-0.8566	4.89	9.57788
1911	14.81	15.304	1.895	-0.0195516	15.483	8.784	-0.82	9.67	-0.146	0.159376	8.1535	7.238	12.3078	-1.02		0.2724	5.22	7.61627
1910	14.523	15.7	-0.343	-0.0312736	16.488	8.882	0.15	9.61	-0.732	0.5124	8.9335	6.549	10.747	-0.44		-0.2727	5.49	10.3309
1909	14.187	15.552	2.397	0.238152	17.019	9.046	-1.36	9.38	-0.33	-0.405462	7.8828	7.13	11.4963	-0.42		-1.5643	5.72	11.7035
1908	14.161	15.12	0.542	-0.0199313	16.541	9.648	-0.27	10.6	0.653	-0.146957	8.0224	7.217	11.0336	0.27		-0.6977	5.26	11.3074
1907	14.126	14.982	-0.669	0.326599	16.286	9.086	-1.33	9.76	-0.091	-0.408878	5.9027	7.472	11.0954	-1.6		-1.0385	5.29	10.5511
1906	14.392	14.338	-0.06	0.246333	16.15	9.001	-0.47	10.02	-0.662	-1.10297	7.9154	7.988	11.5996	0.48		0.0387	5.31	10.0812
1905	14.308	15.281	-0.995	0.228062	16.809	8.987	-1.4	9.96	0.37	-1.51065	7.7777	8.305	10.8818	-0.09		-0.2653	5.26	10.6497
1904	14.593	16.008	-0.342	0.179666	16.401	8.571	-1.27	9	1.04	-1.45257	8.5836	7.023	12.4803	0.4		0.511	5.4	11.0268
1903	14.385	15.272	-2.756	0.269	16.706	8.654	-1.03	8.74	-0.141	-0.561475	7.9723	7.596	12.0636	-0.29		-0.2917	5.39	9.60992
1902	14.254	14.931	0.746	0.134524	16.999	9.639	-1.46	9.08	-0.627	-0.98795	8.0241	8.065	12.1608	-0.86		-1.2762	5.31	10.6879
1901	14.619	15.787	-1.6	0.155563	17.275	10.534	0.61	10.98	-0.578	-0.273932	8.5484	7.876	12.2888	0.3		0.5905	5.58	10.9747
1900	14.766	15.318	0.589	0.021151	17.093	9.124	-0.78	8.94	-0.662	-0.068381	8.075	7.805	11.4353	-0.42		0.0186	5.51	9.60992
1899	14.126	14.416	-2.989	0.315655	15.668	9.985	-1.46	9.47	-1.158	-0.3229	5.1726	7.087	11.3797	-2.35		0.4051	5.89	9.29132
1898	14.413	13.997	2.38	0.0339697	16.562	10.422	-0.9	11.21	-1.173	-0.257989	9.1061	6.973	11.1361	0.71		0.1574	5.13	10.6103
1897	14.803	14.6	1.428	-0.0239202	16.92	9.847	0.44	10.86	-1.183	-0.490301	8.1001	6.889	12.1206	-0.18		0.3755	5.69	11.3493
1896	15.149	13.878	-0.002	0.440342	16.99	10.217	-0.25	11.04	-0.92	0.125782	8.5662	7.016	12.4611	-0.13		-0.3919	5.68	10.8934
1895	15.485	15.244	-0.637	-0.605472	15.487	10.101	-0.29	11.12	-0.647	-0.198772	7.4208	6.638	13.4569	-1.16		-0.8836	5.69	10.2802
1894	15.161	15.525	-2.327	0.0122672	15.862	9.714	-0.1	11.11	-0.439	-1.10525	9.0535	6.886	11.95	0.65		-0.9879	5.5	10.6418
1893	14.689	14.894	-1.307	0.041343	16.183	9.259	-0.39	9.48	-0.513	-0.718058	7.5227	7.628	12.6829	-0.54		0.4732	5.32	10.3464
1892	14.467	15.838	-0.994	0.247668	16.401	9.251	-0.97	8.83	-0.474	-0.208452	8.2173	7.771	12.1382	-0.72		-0.6582	4.8	10.0272
1891	14.616	14.807	-3.607	0.0216162	16.344	10.377	-0.7	10.03	-1.342	-0.798912	8.3638	7.317	12.2717	0.4		-1.1124	5.91	10.5369
1890	15.56	15.566	0.361	0.403376	15.788	10.55	-0.7	11.46	-1.193	-1.51464	8.0846	7.137	11.7772	0.06		-0.1339	5.28	10.2163
1889	15.394	15.083	-4.788	0.0100677	15.59	9.81	-0.08	10.64	0.142	-0.612151	9.3936	7.055	11.7336	-0.35		-0.1249	5.68	10.7674
1888	14.745	14.232	-1.536	0.149959	15.388	9.117	-0.96	9.78	-0.687	-1.2009	8.4781	6.964	12.4118	0.28		-1.0396	5.72	8.3728
1887	14.778	15.258	-0.085	-0.169506	14.701	9.732	-0.58	10.38	0.335	-1.62282	8.3543	6.376	12.7319	-1.03		0.1975	5.25	8.32197
1886	15.263	15.447	-0.738	-0.0832828	14.614	9.363	-0.24	10.92	-0.523	-0.636066	9.3016	7.614	12.9104	0.63		-0.4547	5.61	10.0118
1885	15.13	15.106	-3.934	-0.200679	14.82	9.428	-1.18	9.78	0.206	-0.771581	7.9618	8.015	12.813	-0.7		-1.48	5.27	10.3927
1884	15.562	14.407	-3.854	-0.547887	13.337	9.732	-0.29	10.31	-0.384	-1.21912	7.2103	7.659	12.0219	-0.39		-0.2122	5.5	8.02663
1883	15.383	15.364	-3.095	-0.233778	14.779	10.11	-0.43	11.45	0.142	-0.44418	8.0115	6.314	12.5695	-0.33		-1.3994	4.85	9.90693
1882	14.708	15.281	-4.148	0.0914033	15.257	9.767	-0.21	11.24	-0.459	-1.41272	8.2678	7.003	12.469	-0.04		-0.3676	5.63	10.1121
1881	14.261	15.203	-1.165	-0.076108	16.105	8.761	-1.41	9.61	0.464	-1.16674	7.475	7.226	13.8654	-1.47		-1.8724	4.93	10.4158
1880	14.694	15.451	-0.203	0.0508144	16.476	9.572	-0.64	9.91	-0.206	-1.02268	5.6566	6.517	13.5778	-1.43		0.4235	5.42	10.4081
1879	14.556	13.574	0.18	0.07491	17.18	10.108	-0.02	10.9	0.107	-1.08475	7.903	7.073	12.699	-0.49		-1.2561	5.47	10.195
1878	14.955	14.434	1.042	-0.439841	16.616	9.807	-0.58	10.25	-0.409	-2.15577	9.3748	6.788	13.1514	-0.1		1.149	5.18	10.4517
1877	15.011	14.476	0.803	-0.594982	16.71	10.155	-1.22	10.03	0.082	-1.70482	7.9046	6.398	12.1599	-0.88		-1.1158	5.22	10.8934
1876	15.254	15.065	-1.061	-0.292753	15.915	10.743	-0.97	11.1	0.256	-2.2856	7.0389	6.499	10.8935	-2.26		0.5963	5.16	9.58589
1875	15.66	14.963	-0.879	-0.293113	16.117	9.955	-0.41	10.67	0.971	-1.25158	7.3925	7.194	13.1597	-0.42		0.5218	5.26	9.47435
1874	15.534	14.71	-1.388	-0.236716	15.504	9.409	-1.03	9.89	1.025	-2.13983	8.5699	7.719	13.3374	-0.61		0.5407	4.78	9.45196
1873	15.254	14.954	-2.801	-0.305187	15.014	10.444	-0.94	11.65	0.162	-1.9024	8.8352	7.705	13.8589	-0.69		-0.4783	4.86	8.2421
1872	15.714	15.051	0.427	-0.266241	15.306	9.796	-0.22	10.75	-0.603	-1.61656	7.6117	7.498	12.0472	-1.32		-0.4229	5.02	8.02663
1871	15.66	15.52	0.286	-0.173377	15.813	9.477	-1.07	9.97	-0.583	-3.02353	9.2605	6.556	12.5539	-0.86		0.4158	5.46	9.482
1870	15.049	15.088	2.428	0.0400688	14.75	9.239	-0.08	10.88	0.866	-1.33813	8.6479	7.311	12.1329	-0.97		0.2773	5.25	8.45994
1869	14.675	15.175	0.164	-0.427892	15.322	9.336	-1.47	10.28	0.668	-2.15407	9.1972	7.213	11.4999	-0.02		0.0385	5.46	8.38733
1868	15.189	14.517	0.283	-0.110942	15.405	9.241	0.35	10.25	0.043	-1.5898	8.2118	6.969	11.5621	-0.12		0.7418	5.24	9.44466
1867	15.081	15.47	-5.585	-0.447022	14.503	9.508	-1.12	9.13	0.028	-1.55336	8.2957	7.536	12.0705	-0.57		-0.6336	5.23	9.55385
1866	14.976	14.536	-1.19	-0.273364	15.948	9.927	-1.03	10.06	0.033	-1.97983	7.3528	7.076	10.8205	0.16		-1.3204	5.37	10.1198
1865	15.074	15.327	-1.456	-0.0648861	16.072	9.944	-0.84	10.4	-0.012	-2.00659	8.6225	6.661	11.1236	-0.26		0.2902	5.53	10.1044
1864	15.572	14.025	-2.188	-0.184703	16.727	10.331	-1.33	10.76	0.34	-1.98211	8.8569	6.868	11.6356	0.09		0.3793	4.83	10.195
1863	15.759	14.54	-2.174	0.137719	16.546	10.107	-1.09	10.61	0.732	-1.70311	9.9634	6.082	11.1482	-0.36		-0.0915	5.37	9.06497
1862	15.63	14.338	-1.665	0.252878	16.459	10.178	-0.76	10.24	0.484	-1.20831	8.1645	6.307	11.4378	-0.43		0.4392	5.4	10.1808
1861	15.371	14.871	0.798	-0.648014	16.496	10.663	-0.33	11.88	0.127	-1.83691	8.7668	7.005	11.8111	-1.23		1.1936	5.63	10.3541
1860	14.908	14.471	-1.493	-0.411547	16.546	10.048	-0.23	11.41	-0.568	-2.05271	7.9443	7.06	10.7313	-0.82		-0.273	5.33	10.6951
1859	15.109	14.586	0.839	-0.282305	15.734	9.71	-0.59	10.3	-0.761	-2.46602	9.2639	6.811	11.0652	0.33		1.3025	5.24	8.86782
1858	15.17	14.761	-0.894	-0.226276	16.224	10.572	0.43	11.47	-1.178	-2.71091	7.9484	7.39	11.6364	-0.59		0.8595	5.08	9.71078
1857	15.294	14.476	-0.403	-0.358522	15.578	9.398	-0.32	10.05	-0.846	-1.90667	8.5164	7.235	9.73265	-0.01		0.7999	5.18	9.89939
1856	15.056	15.272	0.499	-0.150163	16.373	10.304	-1.2	10.1	-0.885	-1.88276	9.0452	6.663	9.76683	-1.25		0.0281	5.26	9.99632
1855	15.039	14.862	-3.617	-0.0616282	15.895	10.82	-0.08	11.1	-1.833	-1.70412	8.651	6.866	10.0375	-0.94		0.1409	5.41	9.66551
1854	14.341	15.194	-1.084	-0.125221	13.712	11.179	-0.32	12.34	-1.898	-1.45777	8.4082	6.51	11.1133	-0.78		0.7419	5.04	8.07144
1853	14.507	14.54	0.241	-0.071232	15.619	10.373	-0.78	11.63	-1.213	-1.94849	8.792	6.401	10.7336	-0.49		0.1168	5.24	10.2944
1852	14.803	14.568	-0.057	-0.339586	15.532	10.798	-0.05	11.72	-1.55	-2.20477	9.4034	7.083	10.6948	0.68		0.8512	4.93	9.66551
1851	14.441	14.825	0.194	0.134373	15.005	10.388	-1.25	11	-1.918	-2.37655	8.0984	6.72	11.366	-0.56		0.0726	5.06	10.1352
1850	14.042	14.894	0.01	-0.534084	15.158	9.915	-0.31	11.1	-1.014	-1.85096	8.5385	6.499	11.3538	0.01		0.3266	4.91	9.41545
1849	14.619	14.798	-0.698	-0.354478	15.149	10.213	-0.74	10.8	-0.608	-2.0909	7.289	6.515	10.9327	-1.65		-0.434	4.8	9.93128
1848	15.228	15.102	-0.707	-0.137178	15.623	9.973	-0.92	10.52	-0.9	-1.66908	7.4499	7.347	10.3141	-1.34		0.3039	5.22	9.52181
1847	15.006	14.945	1.064	-0.424078	14.729	10.2	-0.2	11.31	-0.052	-0.896278	8.3862	6.893	9.79281	-0.1		0.0874	4.93	9.92314
1846	14.813	14.701	0.924	-0.194659	14.532	9.671	0.35	11.12	-0.22	-2.4383	8.4177	7.411	11.2908	-0.35		0.9951	5.08	11.0268
1845	14.584	15.028	1.097	-0.283229	14.931	10.011	-0.1	11.1	-0.786	-1.66844	7.0199	7.249	10.7516	0.21		-0.1883	4.86	9.56987
1844	14.857	14.77	0.857	-0.145111	14.367	9.41	-0.9	10.99	-0.642	-2.37665	7.5184	7.646	10.8823	-1.81		-0.4958	5.09	9.27672
1843	14.871	14.361	-2.678	-0.360057	13.387	9.398	-0.77	10.21	-1.883	-2.76503	8.5152	7.126	9.03707	0.34		0.3297	5.2	8.3365
1842	14.717	14.784	0.313	-0.6428	13.58	9.352	-0.44	10.32	0.296	-1.84572	8.0182	7.108	9.91199	-0.01		-0.4094	4.92	7.83247
1841	15.079	14.342	-1.887	-0.0303693	15.409	8.794	-0.83	9.73	-1.005	-1.79762	8.609	7.789	9.96637	-0.44		-1.5436	4.96	9.77868
1840	14.635	15.175	-0.191	-0.323226	14.519	8.856	-0.59	10.31	-0.895	-1.96466	7.9572	8.138	9.63872	-0.47		-0.3791	5.29	8.84592
1839	14.205	14.499	-0.566	0.0943345	15.215	8.865	-0.66	8.79	-1.178	-2.17152	8.4089	8.23	9.96989	0.71		-0.8275	4.95	9.53783
1838	14.21	14.945	-2.965	-0.136767	15.104	8.986	-0.95	9.15	-1.853	-2.90782	6.1585	8.147	9.30199	-2.39		-0.7889	4.81	9.53783
1837	14.273	14.462	-2.965	-0.045088	15.495	8.349	-0.09	8.51	-1.461	-3.96432	6.074	7.279	9.66292	-1.74		-0.1872	4.82	9.03576
1836	14.651	14.738	-2.717	-0.140306	14.808	9.725	-0.61	9.55	-2.017	-3.85105	7.5042	7.192	9.87412	-1.22		-0.3458	5.24	8.22758
1835	14.978	15.24	-2.173	0.0194479	13.877	9.505	-0.22	9.72	-0.806	-2.46924	6.8526	7.598	9.57098	-1.11		0.889	4.98	7.60132
1834	14.628	14.112	-3.799	-0.183338	15.009	10.091	0.62	10.5	-0.647	-2.28858	8.9425	7.427	11.2974	-0.43		1.0308	5.29	8.68528
1833	14.773	13.546	-3.887	-0.371025	14.4	9.953	-0.94	10.03	-1.431	-2.78923	7.3576	7.908	10.9977	-2.35		0.1323	4.96	8.3728
1832	15.273	15.143	-0.987	0.0932862	14.684	10.359	-0.81	10.31	-1.823	-3.49332	6.7398	7.534	11.4975	-1.43		0.1137	4.84	9.30592
1831	15.042	14.407	-3.715	-0.583002	15.063	11.196	1.04	12.06	-1.342	-3.04747	8.4146	6.595	12.015	-0.49		0.5795	5.04	10.2234
1830	15.324	14.563	-1.63	-0.170311	15.421	10.621	-0.16	10.76	-1.402	-2.63762	8.4279	7.137	11.7222	-0.79		0.2843	5.11	10.1584
1829	14.367	14.269	-1.296	-0.00510098	16.06	11.029	-0.2	11.43	-0.99	-3.07651	9.5014	8.02	11.2955	-0.42		-0.6064	5.25	10.2376
1828	14.946	14.471	-2.885	-0.224341	15.907	10.883	0.47	11.38	-1.218	-2.11384	8.0896	7.632	11.4514	-0.17		0.4683	5.77	10.4375
1827	14.964	14.08	-0.135	-0.107086	15.738	11.029	-0.48	11.55	-1.268	-2.51158	8.2376	6.654	9.65981	-1.92		0.2454	4.57	9.57788
1826	15.303	15.943	-0.823	-0.371355	15.438	11.225	0.84	12.83	-1.779	-2.06829	8.1161	7.06	9.99846	-1.17		0.7878	5.1	8.08637
1825	15.175	15.175	-3.731	-0.336829	16.134	9.939	-0.43	10.05	-1.555	-1.7579	8.8166	7.183	9.19526	-0.91		0.9304	4.9	7.72792
1824	14.913	15.032	-1.821	-1.18163	16.113	10.122	-0.53	11.16	-1.813	-2.70459	7.7251	6.424	9.40052	-1.68		0.2492	4.93	8.88973
1823	15.217	15.299	-0.933	-0.743189	16.237	10.317	-0.19	11.86	-1.863	-2.00382	8.7234	6.396	9.56361	-0.46		-0.7787	5.06	10.0812
1822	15.109	14.825	-1.516	-0.477016	15.598	9.292	0.06	10.36	-2.111	-2.43621	8.741	6.389	11.8548	-0.93		0.0767	4.83	8.30019
1821	15.254	15.488	-3.016	-0.621641	15.294	9.439	-1.11	9.79	-4.032	-2.7523	8.0319	6.449	10.8672	-1.32		0.2619	4.77	9.17449
1820	15.502	15.313	-6.243	-0.719231	15.195	9.725	-0.06	11.12	-3.456	-2.67921	7.5317	6.884	10.3608	-0.47		0.627	4.78	8.69258
1819	15.287	15.562	-4.672	-0.425722	14.033	10.263	0.77	11.54	-3.426	-2.75176	7.0963	6.973	9.51424	-1.45		0.7589	4.85	8.2421
1818	15.004	15.194	-7.154	-0.674102	16.22	10.067	-0.59	10.41	-3.431	-2.84189	6.5719	7.085	11.1028	-2.24		0.3525	4.88	8.7948
1817	15.161	16.206	-3.452	-0.503899	15.874	9.742	-0.42	9.9	-3.138	-2.52375	8.6732	7.119	10.1659	0.22		-0.5761	4.67	8.07891
1816	14.252	15.934	-6.637	-0.576807	15.425	9.41	-0.94	10.23	-3.198	-3.15233	8.9973	7.336	10.0522	-0.61		-1.7696	4.83	8.7583
1815	14.301	16.266	-3.851	-0.250795	15.359	8.984	-0.37	9.83	-3.099	-3.09331	7.8617	6.554	12.391	-1.37		0.0698	4.99	8.64877
1814	14.999	16.049	-1.588	-0.153269	14.231	8.916	-0.15	10.16	-1.843	-3.76335	8.8354	6.291	11.9936	-0.79		-0.0193	4.95	6.93725
1813	15.375	16.371	-0.96	-0.0560705	13.947	8.649	-0.16	9.73	-2.459	-3.36946	6.6206	6.348	12.0836	-2.36		0.25	5.43	6.69471
1812	15.52	16.054	-3.272	-0.0842179	15.302	8.539	-0.94	8.65	-0.766	-2.6539	8.7883	6.481	12.1814	-0.31		-1.1339	4.74	7.84741
1811	15.852	15.769	-1.732	-0.0754231	16.43	9.229	-0.24	9.92	-0.727	-3.35885	6.8268	6.2	14.2808	-1.69		0.2459	4.9	10.634
1810	15.483	14.577	-1.901	-0.316011	15.693	9.079	-0.62	9.42	-2.042	-3.14788	6.2418	6.141	13.8254	-1.65		-0.7133	5.1	10.1044
1809	15.504	14.706	-1.07	-0.169916	15.804	9.218	0.38	10.3	-1.65	-2.65039	6.9545	6.419	12.9586	-0.68		-0.4033	5.05	9.80131
1808	15.219	14.444	-0.614	-0.127382	15.413	9.43	0.22	11.18	-0.33	-3.22299	8.9801	7.144	13.137	0.43		0.0306	5.25	10.3086
1807	14.908	13.344	-0.125	-0.159044	14.21	9.195	0.06	10.19	0.211	-2.46273	8.6923	6.784	14.7115	-0.64		-0.9368	5.39	10.544
1806	15.137	16.224	-2.295	-0.0575496	16.253	8.672	-0.07	9.58	-1.034	-3.2072	7.0962	7.101	14.4692	-1.88		-0.2635	5.26	10.4233
1805	14.743	15.221	0.325	-0.196888	15.866	9.685	-0.32	11.25	-0.995	-2.41497	8.1844	7.979	14.6172	0.61		-0.6113	5.01	9.78622
1804	15.175	14.986	-2.109	-0.0980335	16.167	9.555	0.47	11.55	-0.528	-2.88747	8.8943	8.309	13.802	-0.81		-0.549	5.27	9.91499
1803	15.401	15.713	0.192	-0.239317	15.71	8.712	-0.69	10.47	-0.131	-2.93069	8.3867	7.794	14.7268	0.1		-0.6722	5	10.7431
1802	15.27	15.286	-0.011	-0.0142214	15.096	9.382	-0.97	10.55	0.072	-2.0823	9.4802	7.288	14.1244	-0.6		-1.4414	4.92	9.62593
1801	15.616	15.184	-0.202	-0.50692	15.158	9.462	-0.27	10.87	-1.034	-1.903	6.5108	7.4	13.9504	-2.03		-1.3106	5.24	9.24751
1800	14.838	14.163	-1.272	-0.124424	15.405	9.023	-0.56	9.91	-0.424	-1.68038	8.8709	6.941	13.4846	-0.2		-0.3623	5.34	9.51381
1799	14.922	13.5	-2.086	-0.287455	15.784	10.024	-0.76	11.8	-0.424	-2.9374	9.3365	7.244	15.2015	-1.14		-2.4055	5.13	10.0118
1798	14.943	14.052	0.442	-0.110136	15.475	9.741	0.26	11.69	0.648	-2.5957	9.9038	7.363	13.2272	0.48		-0.3413	5.63	10.2305
1797	14.64	14.954	-0.353	-0.568917	14.49	9.622	-0.26	10.66	0.092	-3.10594	7.803	8.419	13.7854	-1.5		-0.8744	5.03	7.7802
1796	14.862	14.48	1.157	-0.856827	15.454	9.489	-0.5	11.73	-0.077	-2.34907	9.3291	7.634	12.3468	0.59		-0.5199	5.51	9.65797
1795	14.5	15.023	-1.037	-0.867515	15.302	9.431	-0.89	10.78	-1.168	-3.29747	8.2932	8.41	12.1832	-1.53		-0.4647	5.31	9.48978
1794	14.577	15.608	0.713	-0.408215	14.964	9.322	-0.75	10.93	-0.28	-3.41262	9.3345	7.555	11.3394	-0.04		0.1405	5.32	9.90693
1793	14.705	14.825	1.398	-0.430547	15.265	9.028	-0.92	10.57	-0.503	-3.02556	8.1867	7.906	10.9764	-0.68		-0.7845	5.26	9.23291
1792	14.675	14.227	-0.168	-0.736624	13.012	9.456	-0.86	10.61	-0.856	-2.84015	8.8681	7.881	11.5913	0.41		-0.0977	5.54	7.90715
1791	15.263	14.237	0.591	-0.576402	15.026	9.233	-1.03	10.36	-0.007	-2.2267	8.5556	7.267	11.2892	-0.39		-0.0723	5.89	9.70324
1790	15.889	14.922	0.389	-0.596911	14.948	9.474	-1.41	9.33	-0.29	-2.58324	7.8528	6.706	12.1544	-0.32		-0.9859	5.2	9.86921
1789	15.34	14.347	-1.651	-0.883706	14.733	9.555	-0.49	11.32	-0.275	-2.75517	7.8214	7.042	11.0833	-0.85		-0.1494	5.01	8.81671
1788	14.866	15.281	-2.496	-0.513947	13.992	9.236	-0.79	10.76	0.395	-2.70987	8.2176	7.377	10.5186	-0.91		-0.3226	5.39	7.39205
1787	14.189	15.433	0.466	-0.736597	14.791	9.197	-1.38	10.17	0.092	-2.48842	6.6717	7.094	12.2897	-1.71		-0.9767	5.27	9.83149
1786	15.179	14.789	-0.927	-0.486343	15.887	9.04	-1.51	10.89	-0.082	-3.44451	8.5831	7.057	13.1759	-0.91		-1.2378	5.76	10.004
1785	14.483	14.08	0.933	-0.201946	14.033	9.904	-1.33	10.75	0.276	-2.02099	8.1736	7.737	12.3325	-1.91		-0.8224	4.86	8.69258
1784	14.493	14.517	-0.859	-0.0803273	14.738	9.587	-1.74	10.16	1.65	-0.925263	7.705	7.26	12.436	-1.55		-1.0196	5.29	10.1275
1783	14.953	13.767	-4.676	-0.18017	14.107	9.384	-1.13	9.78	0.137	-1.71413	8.2952	7.126	11.5393	-1.02		-0.2988	5.2	9.5058
1782	14.873	14.14	2.114	-0.273047	16.191	9.966	-0.89	10.76	0.365	-2.38327	7.0089	6.982	13.0774	-1.48		-2.6142	5.08	10.9664
1781	15.14	14.867	0.852	-0.144611	16.92	9.605	-0.61	10.41	0.092	-1.39447	7.9863	6.902	12.3906	-0.92		-0.3195	5.58	11.1608
1780	14.934	15.148	0.997	-0.124048	15.998	10.581	-0.41	11.58	0.286	-0.82045	8.3926	7.42	11.5616	-0.42		0.0039	5.5	10.5156
1779	15.165	14.835	1.403	-0.433801	16.949	10.124	0.03	11.53	-1.63	-1.63255	6.5734	6.975	11.4199	-0.82		0.7949	6.04	10.6879
1778	14.96	15.005	1.932	-0.239485	16.665	10.289	-0.21	10.8	-0.082	-0.601771	8.1306	6.761	11.7771	-0.76		-0.3943	5.71	10.0889
1777	15.144	14.094	0.491	-0.330496	16.282	9.967	-0.33	10.94	-1.188	-0.299466	7.2335	7.317	12.0923	-1.11		-0.8648	6.03	10.7108
1776	14.869	14.536	-2.591	-0.529249	16.504	10.194	0.58	11.93	-0.464	-0.548049	9.1138	6.925	11.5848	0.4		-0.4145	6.31	9.53783
1775	14.971	14.319	1.861	-0.276215	15.409	10.484	0.53	11.6	-0.126	-0.732938	7.8752	6.923	12.2027	-0.28		-0.2564	6.06	9.39354
1774	15.086	14.664	0.504	-0.567257	15.458	10.303	0.11	11.29	-0.543	0.661315	9.9295	7.723	11.8504	-0.44		-0.6677	5.83	9.60992
1773	15.646	14.329	-1.053	-0.167597	16.529	9.593	-0.1	11.01	-1.049	-0.253183	9.5021	7.304	11.8614	0.99		-0.5585	6.12	10.5085
1772	15.275	14.674	-3.15	-0.130556	15.973	9.772	-1.33	9.6	-1.163	-0.800699	9.2314	7.279	11.5315	-0.29		-1.4993	6.31	8.28567
1771	15.558	14.154	0.458	-0.173441	15.878	9.411	-0.57	10.14	-1.416	0.188505	8.8651	7.112	11.2449	-0.61		-1.227	5.34	9.17449
1770	15.245	14.264	-3.672	-0.934294	15.788	9.516	-0.32	10.33	-1.203	-1.31632	8.3931	6.829	10.1447	-0.34		-0.4202	5.5	11.1398
1769	14.95	14.112	1.009	-0.710257	15.557	9.131	-0.27	9.75	-0.265	-0.682653	8.0437	6.727	12.4389	-0.86		-0.3958	5.14	10.3927
1768	15.228	14.338	-0.676	-0.637989	15.059	9.877	-0.45	9.99	-1.039	-1.24109	8.977	6.515	12.3415	0.98		-0.165	5.42	10.195
1767	15.142	15.111	2.459	-0.253131	15.611	10.944	-0.34	11.13	-0.116	-1.82238	8.1969	7.746	11.1391	-0.59		-0.2453	5.4	11.2096
1766	14.883	14.568	-2.26	-0.980782	15.788	12.114	0.31	12.03	-0.662	-1.98525	7.6347	7.427	11.9463	-0.75		0.441	5.37	11.1887
1765	14.787	15.161	-0.003	-0.390626	15.265	11.243	-0.51	10.97	-1.198	-2.75779	9.1019	7.819	11.0716	-0.7		0.3326	4.99	11.0769
1764	14.514	14.637	0.247	-0.165339	14.643	11.228	-0.31	11.03	0.529	-2.0365	8.1181	6.722	10.4432	-1.15		-0.2303	5.17	9.42275
1763	14.665	15.474	-2.396	-0.200971	15.071	11.95	-0.49	11.61	0.42	-1.56708	7.4481	7.76	13.2043	-0.77		-0.5275	5.11	10.5085
1762	14.483	15.194	0.188	0.0127738	15.598	12.212	-0.3	12.12	-0.945	-1.10617	7.2903	7.438	11.8385	-1.57		-0.2211	5.52	11.3912
1761	14.689	14.858	0.447	-0.028946	16.842	12.017	0.14	12.93	-0.642	-0.816102	7.3893	7.329	11.3021	-0.68		-0.0906	5.89	10.4872
1760	14.813	14.618	-0.994	-0.151049	15.775	11.449	-0.27	12.22	-0.394	-0.983531	7.3034	6.907	12.1533	-0.91		-0.219	5.52	10.9581
1759	15.049	14.729	-1.182	-0.182666	16.352	10.978	-0.65	11.8	-0.861	-1.65983	8.8562	6.611	12.4852	-0.76		-0.3756	5.59	11.2585
1758	14.974	15.184	0.9	-0.566813	15.495	11.297	0	11.66	-1.302	-1.43762	7.8767	6.663	11.9457	-0.23		-1.3206	5.59	10.2802
1757	14.82	15.051	1	-0.310932	15.335	11.222	0.29	12.06	0.226	0.995155	9.0312	6.116	12.6692	-0.56		-0.9555	5.4	11.6369
1756	14.275	15.299	1.077	-0.332942	15.763	10.875	-0.61	11.27	-0.419	-0.699628	9.3598	5.812	11.2277	-0.18		-0.7236	5.21	10.7512
1755	14.757	14.747	-2.885	-0.430209	16.228	11.067	-0.2	12.46	-0.091	-0.741182	7.5177	5.765	13.0448	-1.06		-1.4438	4.94	11.5267
1754	15.497	15.143	1.036	-0.433187	14.923	10.132	-0.56	11.92	-0.295	-0.939318	7.9059	5.885	13.0331	-0.17		-0.7218	5.58	10.0966
1753	14.892	15.704	-2.122	-0.411991	16.093	10.118	-0.35	11.51	-0.687	-2.51023	8.4124	6.608	11.95	0.19		-0.6655	5.43	11.0979
1752	14.687	15.263	-2.649	-0.24257	16.093	9.874	0.72	11.71	-0.538	-1.99046	7.4577	6.8	11.6193	-1.66		-0.5353	5.06	11.0268
1751	14.63	14.618	-0.109	-0.12353	15.046	9.108	-0.33	11.33	-0.826	-3.68721	8.3641	7.199	12.5686	-0.21		-0.6942	5.33	9.56987
1750	14.729	15.226	-2.128	-0.490151	14.425	9.294	0.29	11.71	-1.625	-2.45553	7.9057	7.457	12.2685	-0.13		-0.0358	5.65	8.73639
1749	15.495	15.805	-2.609	-0.476683	14.865	9.467	0.09	11.22	-0.92	-0.613122	7.1258	7.181	12.669	-2.08		0.0704	5.75	10.5795
1748	15.198	15.405	-1.401	-0.248638	15.491	9.633	-0.24	10.66	-0.057	0.593432	8.4037	6.875	12.1562	-0.37		-0.3294	5.9	11.2655
1747	14.441	15.405	-1.25	-0.190323	15.014	9.273	-0.66	10.29	-1.411	-0.997388	9.1489	6.827	11.5637	-0.45		0.1576	5.72	10.473
1746	14.488	15.189	-1.574	0.0274462	12.785	9.585	-0.3	11.19	-0.747	-1.65969	7.4053	6.173	12.6424	-1.97		-0.6085	5.65	8.64148
1745	15.52	14.071	-0.782	-0.241268	15.129	9.095	-0.46	10.18	-1.526	-1.95513	8.0112	6.72	12.6766	-0.4		-0.1186	5.17	9.83903
1744	15.513	14.034	-0.252	-0.0422235	16.422	9.376	-0.25	10.87	-1.342	-2.94647	7.7644	6.159	11.7529	-2		-0.6824	5.21	10.3772
1743	15.826	14.227	-0.67	-0.236683	16.933	9.533	-0.97	9.94	-1.65	-2.23712	9.2062	6.921	12.0423	-0.74		-0.1411	5.44	10.385
1742	15.595	14.269	-4.473	-0.0544895	16.78	9.628	-1.62	9.8	-0.206	-2.7039	8.6147	6.934	13.7754	-1.2		-0.5973	5.33	10.8714
1741	15.572	14.77	-3.372	-0.195563	16.113	8.885	-1.33	9.42	-1.362	-2.80221	9.3788	6.93	14.131	-0.42		0.0819	5.33	9.29862
1740	15.336	14.683	-1.086	-0.249834	17.369	9.435	-0.6	10.25	0.122	-2.07096	7.5511	6.788	14.3947	-0.46		-0.8721	4.85	9.99632
1739	14.343	14.338	-2.662	-0.19133	17.11	10.575	-0.66	10.47	1.258	0.42489	9.4837	7.142	14.5634	-0.48		0.1671	5.25	10.5298
1738	14.43	14.324	-2.662	0.0480685	17.106	10.299	0.36	11.22	0.033	0.767743	6.9516	6.588	11.3263	-2.49		0.8173	5.16	9.64996
1737	14.565	14.793	-0.96	-0.0603454	16.842	9.435	-0.57	9.83	-0.057	-0.190663	8.4427	7.19	13.8604	-1.17		-0.0823	5.4	10.3086
1736	14.715	14.807	-2.517	0.207971	17.011	9.907	0.23	11.35	-0.022	-0.640797	7.5431	6.741	13.2288	0.06		0.7228	4.92	6.71676
1735	14.612	13.947	-0.417	0.189472	16.752	9.32	-0.05	10.3	-0.697	-1.18936	8.6653	6.896	11.8237	-0.98		0.7635	5.96	8.56887
1734	14.591	14.043	-1.447	-0.027362	17.386	8.608	-0.33	9.21	-0.34	-1.73564	8.5383	6.82	12.9437	0.15		0.6966	5.64	11.6736
1733	14.971	13.698	0.722	-0.295642	14.338	9.417	-0.83	10.22	-0.146	-2.22228	8.4008	7.406	14.4243	-0.7		0.5636	5.78	9.77868
1732	15.558	13.974	-4.684	-0.202054	16.093	9.304	-0.21	10.73	-0.965	-1.79193	7.3276	7.288	14.2205	-0.92		-0.0735	4.95	9.80886
1731	15.303	15.028	-1.105	-0.294841	15.994	9.225	-0.58	9.77	-0.082	-2.03508	7.0133	6.891	13.1744	-2.26		0.456	5.76	10.3086
1730	14.834	13.675	-3.533	0.0944695	16.389	9.314	0.13	11.36	-0.052	-1.42626	8.3457	7.037	12.4561	-0.52		0.3809	5.63	11.3074
1729	14.275	14.954	0.598	-0.420384	16.471	8.82	-0.66	10.32	0.36	-1.91842	7.9882	7.42	14.3264	-1.85		0.1264	5.54	11.2166
1728	15.116	14.798	-0.725	-0.285614	15.244	8.521	-0.99	9.22	0.291	-0.324902	8.7693	7.333	13.0838	-0.96		-0.0872	5.2	10.3772
1727	15.016	14.31	0.734	-1.05312	15.499	9.412	-0.04	10.25	-0.146	-0.0569736	6.8633	6.991	13.2944	-0.73		0.8509	5.69	10.5511
1726	15.149	14.646	0.103	-0.118267	15.635	9.032	-0.53	10.18	-0.295	-1.22519	7.675	6.994	13.4607	-0.2		0.022	5.49	10.473
1725	14.474	15.069	-2.001	-0.510487	16.9	9.392	-0.62	10.82	-0.761	-2.14298	6.5486	7.229	14.0122	-1.15		-0.9944	5.5	11.034
1724	14.887	15.364	0.622	-0.123746	15.742	9.052	-0.68	9.81	-0.111	-2.02799	9.0578	7.591	12.7499	-0.18		-0.8614	5.56	10.0503
1723	14.857	14.982	-2.915	-0.604854	15.504	8.641	-0.99	9.54	-1.665	-2.52596	7.679	8.207	13.3232	-0.98		-0.4391	5.22	10.7512
1722	14.679	15.7	-1.296	-0.266169	16.756	9.239	-1.3	10.26	-0.925	-1.97741	8.5197	7.664	11.756	0.19		-1.2737	4.96	11.6442
1721	15.238	15.773	0.02	-0.848322	15.154	8.763	-0.33	10.15	-1.794	-2.02797	8.3542	7.653	11.8507	-0.71		-0.3091	5	9.87675
1720	14.633	15.074	-0.278	-0.423501	15.631	8.674	-0.43	9.75	0.087	-1.01109	8.2332	7.472	12.9482	-0.73		-0.861	5.22	10.3541
1719	14.612	13.96	0.48	-0.418546	15.417	8.846	-0.44	9.1	-0.771	-1.02602	8.0546	7.682	13.0722	-0.34		0.013	5.46	9.93942
1718	14.687	14.664	-3.002	-0.322467	15.491	9.332	-0.36	9.89	-1.516	-1.95748	8.6127	7.057	12.2748	-0.28		-0.5441	5.55	10.5582
1717	15.684	15.171	-2.424	-0.674739	16.15	9.08	-0.74	9.85	-2.166	-2.3755	8.2461	6.51	12.2711	-1.21		-0.743	5.01	10.195
1716	15.457	14.577	0.576	-0.314167	15.722	9.169	-0.79	10.03	-1.153	-2.26876	8.1235	6.389	12.7861	-0.9		-0.8058	5.06	10.2589
1715	14.985	15.111	1.021	-0.863662	15.755	9.402	0.09	10.94	-0.756	-1.74311	7.3288	7.178	13.8048	-1.35		-0.3443	5.43	10.0426
1714	14.834	14.499	-3.822	-1.07662	16.138	9.465	-0.43	10.22	-0.642	-0.346068	7.543	6.788	13.1328	-0.31		-0.0956	5.04	10.5945
1713	15.289	15.359	-1.335	-0.930714	15.199	9.896	-0.56	10.31	-0.756	-1.2673	7.7985	7.345	12.7558	-0.79		-0.2186	5.11	11.6148
1712	15.189	15.465	-0.489	-0.63256	14.952	9.744	-0.27	10.19	-0.469	0.591159	8.1667	7.144	13.045	-0.44		0.1091	4.94	10.385
1711	15.135	14.715	-1.229	-0.56027	15.236	9.445	-0.52	10.99	-0.647	-0.303594	7.7089	6.481	14.2547	-1.32		-0.6587	4.92	10.7593
1710	15.02	14.204	0.087	-0.686792	14.791	9.37	-1.04	9.93	-0.702	-1.50359	7.1669	6.672	12.6546	-0.54		-0.8846	5.24	10.0735
1709	15.31	13.675	-0.641	-0.0919062	15.261	8.832	-0.98	9.34	-1.387	-2.34183	7.0987	6.829	12.8771	-1.61		-0.9371	5.28	10.4872
1708	15.667	14.154	-0.432	-0.539151	15.458	9.448	-1.09	9.7	-1.362	-0.535367	7.3637	6.743	12.3572	-0.91		-0.9022	5.44	10.7512
1707	15.371	15.419	0.422	-0.585014	15.314	9.947	-0.33	11.36	-0.543	-0.173434	7.3268	6.658	13.8525	-1.08		-0.9182	5.11	10.1584
1706	15.081	14.724	-3.159	-0.713474	15.108	8.77	-0.98	9.94	-0.766	0.0867073	8.0999	6.225	13.675	-0.6		-0.6566	5.12	9.38624
1705	15.721	15.166	-0.967	-0.460204	14.396	8.971	-1.05	9.62	-1.615	-0.721386	7.7117	6.759	12.3669	-0.78		-1.0017	4.97	9.89184
1704	15.231	15.111	-0.731	-0.246603	14.787	10.198	-0.82	10.93	-1.332	0.556154	7.7352	6.718	10.9719	-1.29		-1.1428	4.96	9.65797
1703	14.726	15.079	-0.689	-0.407174	14.989	10.499	0.46	11.57	-1.684	0.0683978	7.57	6.973	11.9297	-1.4		-1.0565	5.05	9.66551
1702	14.99	15.286	-0.564	-0.165458	14.387	10.153	0.13	11.11	-1.739	-1.42713	7.0806	6.64	10.9092	-1.52		-0.8882	5.35	8.09384
1701	14.411	14.586	-1.467	-0.454479	14.713	9.831	-0.7	9.81	-1.878	-0.296992	7.2514	6.668	10.2437	-2.92		-1.0337	4.67	9.34973
1700	14.831	14.747	-1.489	-0.0583039	14.066	9.523	-0.41	10.88	-1.689	0.0824547	6.8455	6.118	10.0148	-1.8		-1.5602	5.16	10.3772
1699	14.775	15.203	-4.094	-0.636923	13.638	9.479	-0.67	10.16	-2.508	-1.10076	6.373	5.739	9.98014	-3.28		-1.2666	4.85	8.81671
1698	14.834	15.631	-4.219	-0.457418	15.17	9.71	-0.5	11	-1.888	-0.664291	6.8055	5.655	11.178	-1.79		-2.4737	5.3	8.84592
1697	14.563	15.309	-2.119	-0.155602	14.861	9.437	-0.29	9.59	-1.67	-0.757536	7.6848	6.139	11.0117	-2.18		-1.5593	5.23	10.1584
1696	15.074	15.051	-0.053	-0.307067	14.771	9.248	-0.87	9.26	-2.151	-1.42083	7.6791	6.702	11.6251	-2.29		-1.9331	5.37	10.3772
1695	14.425	14.384	1.077	-0.235442	15.483	9.796	-0.91	9.59	-1.804	-1.15739	6.8125	7.655	11.6499	-1.39		-1.7168	5.57	9.35704
1694	14.808	15.019	-3.328	-0.463065	16.467	10.287	0.01	11.14	-0.851	-0.985185	7.8337	7.605	12.152	-1.31		-0.5405	5.75	11.2795
1693	14.827	14.503	-1.251	-0.515487	15.458	10.283	0.35	11.35	-1.287	-1.01675	8.1226	7.322	13.0888	-1.32		-0.4178	5.64	9.17449
1692	14.504	13.905	-1.262	-0.334872	15.434	9.865	-0.26	11.44	-1.119	-1.41662	7.9603	7.317	12.5767	-0.79		-1.5571	5.86	10.9911
1691	15.317	14.871	-1.341	-0.119233	14.787	9.529	0.1	10.89	-0.905	-1.7319	8.4755	6.857	13.1383	-0.39		-0.8584	5.52	10.4872
1690	15.24	14.674	0.058	-0.148311	15.475	9.291	-0.33	10.18	-0.851	-1.75647	8.4305	6.973	12.3693	-1.66		-0.3905	5.5	9.97198
1689	14.908	14.715	-3.077	-0.497329	15.327	9.675	0.24	11.77	-1.471	-1.00918	9.1483	7.349	14.0931	-0.39		-0.1607	5.16	10.8787
1688	15.107	14.724	-1.234	-0.269875	14.21	8.699	-0.51	9.78	-0.548	-0.551729	7.4144	7.251	12.4991	-2.39		0.2687	5.25	9.62593
1687	14.406	15.405	-0.213	-0.655905	15.635	9.235	-0.6	9.61	0.494	-0.219907	8.2986	7.441	12.8427	-0.61		-0.3727	5.08	10.8787
1686	14.588	15.437	-0.303	-0.507364	15.574	9.169	-0.59	10.08	-0.369	-0.949031	8.3997	7.32	12.9589	-1.21		-0.7671	5.61	11.0626
1685	14.796	15.221	0.149	0.0788433	14.787	9.369	-0.76	10.62	-1.407	-0.392676	7.1674	7.397	12.9703	-1.97		-0.615	4.73	9.43735
1684	15.198	15.502	-2.207	-0.600191	15.359	9.572	-0.05	10.41	-0.121	-0.361256	8.0742	7.311	13.8275	-0.01		-0.5672	5.54	9.85412
1683	14.481	15.608	-2.17	-0.050132	16.023	9.731	-0.67	10.29	-0.27	-0.837275	7.4373	7.587	11.2562	-1.05		-0.6664	5.5	11.3493
1682	14.82	15.281	-2.054	-0.241147	16.01	9.595	-0.41	9.83	-0.682	-2.34446	7.4902	6.861	11.3452	-0.77		-1.002	5.87	11.0197
1681	14.418	14.503	-0.282	-0.62137	16.294	8.882	0.15	9.46	-0.712	-1.29293	8.2793	6.442	12.1977	-0.44		-0.951	5.67	10.886
1680	14.904	14.094	-1.897	-0.258182	15.635	8.548	-0.12	8.55	-1.307	-2.01741	7.7442	5.942	12.5956	-0.39		-0.3109	5.57	10.6576
1679	15.046	14.927	-4.078	-0.257939	15.627	9.616	-0.19	9.77	-0.826	-0.896939	8.0036	5.692	10.9191	0.08		-0.8541	5.32	10.4801
1678	15.359	15.447	-0.005	-0.48873	15.965	9.26	-0.63	9.95	-1.853	-1.36982	7.3669	6.214	12.6447	-0.91		-0.8322	5.97	9.98013
1677	14.908	14.908	-2.035	-0.188912	15.553	9.481	-0.73	10.27	-2.419	-1.5294	7.8522	5.917	11.9485	-2.12		-1.4819	5.6	9.63394
1676	14.416	14.94	-2.035	-0.613935	15.734	9.446	-0.28	9.9	-1.426	-1.35513	7.5124	6.341	13.0636	-1.21		-0.2718	5.64	8.69258
1675	14.799	16.086	-1.521	-0.485406	14.659	9.297	-0.88	9.03	-2.92	-1.65754	8.0218	6.741	12.6401	0.01		-1.0171	5.44	8.7583
1674	14.696	14.835	-0.866	-0.228689	15.878	9.462	-0.91	9.9	-0.99	-1.3899	6.1417	6.54	12.4362	-2.83		-0.966	5.47	9.62593
1673	14.822	15.741	-1.455	-0.154187	14.297	9.764	-0.69	10.24	-0.637	-1.32237	6.5973	6.768	12.0096	-0.24		-0.3468	5.28	8.91163
1672	14.488	15.171	0.872	-0.834931	16.735	9.665	-0.97	9.62	-0.781	-2.92538	7.4926	6.772	12.1014	0.21		-0.5956	4.98	10.3086
1671	15.039	14.779	2.028	0.104287	16.08	9.97	-0.41	10.61	-0.97	-1.87589	7.2347	7.219	13.0449	-1.06		-0.8242	5.01	9.86921
1670	15.147	14.237	0.921	-0.0724066	15.495	9.538	-0.75	10.11	-1.228	-2.92777	6.7309	6.989	12.4434	-1.75		-0.4203	4.91	8.88973
1669	15.256	14.646	-0.971	-0.11678	15.578	9.345	-0.32	9.52	-0.667	-2.5988	6.6527	7.023	12.0367	-0.76		-0.4771	5.19	9.44466
1668	15.833	13.772	-1.017	0.0366656	15.421	9.744	-0.41	10.58	-1.188	-2.74107	7.2794	6.834	12.2472	-1.95		-0.8644	5.34	9.62593
1667	15.761	14.614	-2.812	-0.389303	16.484	9.188	-0.97	9.67	-0.022	-2.80958	7.5955	6.916	12.7033	-1.04		-2.1245	5.16	9.40815
1666	15.539	14.283	-1.971	-0.301981	16.237	9.681	0.78	10.46	1.075	-2.30969	7.9147	6.681	13.8868	-0.96		-0.8646	5.46	9.52982
1665	15.28	13.79	-0.663	-0.720945	15.936	10.117	1.12	11.92	0.588	-1.02102	7.7538	6.469	12.2408	-1.55		-1.0074	5.38	9.78622
1664	15.756	14.191	-0.65	-0.267574	15.813	10.007	0.79	11.52	0.425	-1.67749	8.5015	6.28	13.3401	-1.72		-0.9025	5.38	8.53982
1663	15.553	14.301	-0.315	-0.615608	15.714	9.845	0.06	10.14	-1.079	-1.98042	8.5443	6.246	12.6719	-0.33		-1.1412	5.58	9.07227
1662	15.275	14.085	-1.253	-0.34205	15.339	9.748	-0.2	10.87	-0.186	-2.35023	8.4664	6.547	12.8331	-0.5		-1.493	5.71	7.61627
1661	15.102	13.717	-0.873	-0.082072	15.878	9.826	-0.16	10.89	0.668	-2.60233	9.3742	6.487	12.5786	0.24		-1.1985	5.36	8.29293
1660	14.873	14.052	-1.02	-0.30296	15.467	10.547	-0.08	11.81	-1.153	-0.53721	7.545	6.501	13.4529	-1.27		-0.7826	5.48	8.38733
1659	15.016	14.609	0.911	-0.2821	14.816	10.015	-0.48	11.15	-0.642	-1.19947	8.8227	6.462	13.0246	0.38		-1.1079	5.36	9.15259
1658	15.004	14.618	1.631	-0.20008	15.281	10.834	0.2	12.05	-0.781	-1.69058	8.4759	6.524	11.1182	-0.85		-0.7133	5.57	8.7656
1657	15.158	14.775	-0.112	-0.727967	15.862	10.213	0.26	10.96	-0.742	-0.942513	8.0242	7.042	11.2374	-1.3		-0.2001	5.85	8.91163
1656	16.001	14.885	1.451	-0.441855	14.845	10.061	0	11.01	-0.444	-1.10326	9.0009	6.941	12.5512	0.55		-0.3585	5.6	8.96274
1655	15.385	15.106	-3.06	-0.471114	15.742	10.659	1.1	11.58	-0.642	-0.810345	7.5082	6.72	11.6527	-1.51		-0.5443	5.48	7.81754
1654	15.224	15.368	0.505	-0.305644	15.553	9.644	-0.2	10.48	-1.61	-2.23317	7.8177	6.834	11.8669	-0.54		-0.5749	5.15	11.1817
1653	15.116	14.913	0.267	-0.535922	15.574	9.875	-0.24	10.12	-0.771	-1.70037	8.2599	6.907	12.9526	-1.55		-0.7634	5.54	11.455
1652	14.602	14.973	-1.933	-0.492918	13.881	9.811	0.81	10.55	-1.253	-1.28138	8.7119	7.099	11.7985	0.54		-0.5894	5.14	9.47435
1651	14.31	13.781	-2.513	-0.676103	15.104	9.701	0.04	10.74	-1.019	-0.849208	8.8634	7.673	11.3282	-0.86		-0.823	5.32	11.034
1650	14.584	14.287	0.883	-0.451691	15.1	9.428	0.13	10.58	-1.178	-0.552912	8.3287	7.165	11.7138	-0.98		-1.756	5.54	10.0812
1649	14.381	13.97	-1.704	-0.753464	15.808	9.07	0.57	10.88	-0.449	-1.23241	8.3478	6.93	11.41	-0.81		-1.3292	5.67	10.832
1648	14.5	14.908	1.234	-0.314664	16.282	9.055	-0.01	11.01	-0.732	-0.582733	7.9999	7.019	9.89763	-0.45		-1.4764	5.61	11.1398
1647	14.266	14.48	-1.247	-0.234161	15.837	9.062	-0.76	9.09	-1.332	-1.95914	8.7224	7.16	10.8902	-1.23		-0.8545	5.13	10.5866
1646	15.03	14.278	0.033	-0.449183	15.401	8.583	-0.14	9.5	0.152	-2.40209	7.6918	6.777	9.60188	-0.04		-0.2561	5.38	10.0581
1645	15.163	14.835	-1.256	-0.383102	16.327	8.129	-0.25	9.39	0.052	-2.86329	7.7244	6.959	12.0372	-0.3		-1.1467	5.43	9.211
1644	15.558	15.787	-4.921	-0.457625	16.134	8.563	0.11	9.01	-0.211	-2.21735	6.7928	6.524	10.768	-0.24		-0.8405	5.43	10.4004
1643	15.168	15.442	-1.79	-0.543653	14.305	9.311	-0.56	9.25	0.281	-2.67921	7.1893	6.85	13.1388	-1.61		-0.9494	5.25	10.2092
1642	15.359	14.904	-3.756	-0.531339	14.655	8.076	-0.8	9.74	-0.479	-2.73859	7.1479	6.971	12.9618	-0.12		-1.0346	5.41	10.6951
1641	15.562	14.959	-2.62	-0.846668	15.718	8.477	-0.86	8.82	-0.305	-1.80901	5.2847	6.839	11.926	-2.27		-0.5593	5.44	10.1429
1640	15.2	14.853	-2.095	-0.185235	16.974	10.074	0.62	11.68	0.147	-2.10054	8.1582	7.099	13.4876	-0.4		-1.578	5.35	12.2668
1639	14.969	14.738	-1.365	-0.409799	15.327	9.537	-0.34	11.28	-1.749	-2.71079	8.7932	6.412	12.8537	-0.44		-2.13	5.62	10.8481
1638	15.413	16.243	0.078	-0.441312	15.767	9.484	-0.47	9.75	0.598	-3.45114	8.5226	7.174	12.5717	0.23		-0.9772	5.63	10.983
1637	14.957	15.382	2.861	-0.0248939	15.697	9.692	-0.1	10.91	0.162	-3.43477	7.7938	7.19	12.4599	-1.78		-0.9753	5.47	10.832
1636	14.719	14.227	1.372	-0.0049351	16.97	9.336	-0.42	11.48	-0.255	-2.00261	9.3551	7.343	11.4909	-0.09		-1.7499	5.6	11.0054
1635	14.465	14.085	-1.351	-0.154464	15.981	9.179	-0.52	9.93	-0.32	-2.51357	8.2329	7.764	12.8008	-1.02		-1.2894	5.27	11.3423
1634	14.75	14.411	-4.236	-0.811023	16.282	9.563	0.33	11.39	-1.089	-1.76405	8.8664	7.591	12.6394	-0.07		-1.6663	5.47	10.004
1633	15.247	15.695	-0.681	-0.732859	15.446	9.123	-0.97	9.29	-1.675	-2.12696	7.5658	7.085	11.9868	-0.15		-1.7092	5.49	10.1352
1632	14.892	14.586	-2.617	-0.431787	16.331	9.749	-0.77	10.24	-1.496	-1.75413	8.5837	7.737	11.9602	-0.43		-1.0518	5.44	11.0125
1631	15.016	14.048	-4.197	-0.401915	16.171	9.533	0.41	10.8	-0.93	-1.56862	8.272	6.998	12.4374	-1.85		-0.4687	5.43	10.2376
1630	15.294	14.66	-1.742	-0.51469	16.084	9.307	-0.1	10.2	-1.163	-1.06801	7.9019	7.336	12.9018	-1.03		-0.6997	5.98	10.7512
1629	15.058	13.767	-0.98	-0.233107	16.191	10.515	0.91	11.79	-0.632	-0.436071	7.0196	6.829	14.2946	-1.51		-0.4683	5.81	10.9007
1628	14.836	13.855	-1.805	-0.463666	14.865	9.669	0.01	11.29	-2.369	-0.841322	7.0351	7.087	12.414	-0.6		-1.2876	5.92	10.4659
1627	14.324	13.878	0.972	-0.744982	15.384	9.717	-0.1	10.98	-0.151	-1.13546	6.8955	6.996	12.812	-0.31		-1.1098	5.54	10.4801
1626	14.801	13.114	-0.774	-0.729316	16.669	9.904	0.03	11.75	-1.069	-0.449305	6.6567	6.69	14.1699	-1.26		-0.995	5.42	11.1608
1625	14.567	14.283	-1.129	-0.679888	16.784	9.248	0.18	10.24	-0.359	-0.793218	7.2445	6.567	13.4648	-1.08		-0.8289	5.53	10.5795
1624	14.623	13.505	-0.744	-0.34224	15.817	9.187	-0.55	10.72	-0.523	-0.66909	7.4509	6.36	13.0261	-1.27		-0.4605	5.09	9.06497
1623	14.824	13.914	-1.438	-0.559253	14.919	9.085	-0.45	10.09	-0.667	-0.595639	8.2283	6.528	12.2857	-0.15		-1.0114	5.38	10.5156
1622	15.02	14.609	-2.754	-0.436969	15.751	9.108	0.32	10.64	-0.697	-0.573432	7.5397	7.069	14.1599	0.05		-0.4575	5.68	10.3772
1621	14.759	14.029	-0.593	-0.658242	16.496	9.297	-0.32	10.76	-0.121	-1.35578	6.6729	7.133	13.322	0.47		-1.0591	5.64	11.0555
1620	14.579	14.02	1.409	-0.861303	15.969	8.425	-0.64	9.43	-0.483	-1.37571	8.3765	6.608	13.0105	-0.91		-0.2201	5.83	11.5121
1619	15.329	14.816	1.876	-0.480136	16.455	8.736	-0.49	10.64	-0.206	-1.61941	8.6109	6.962	10.1746	-0.43		-0.4156	5.26	9.96384
1618	15.016	14.715	0.479	-0.543459	16.274	8.926	-0.05	9.71	-0.781	-0.79151	7.7195	6.741	13.449	-0.31		-0.3391	5.7	9.24751
1617	14.523	13.744	-4.458	-0.541124	16.801	8.941	0.17	10.35	-0.603	-1.74126	8.631	7.281	12.2801	-0.11		-0.4355	5.54	11.8571
1616	15.02	14.356	-0.672	-0.483562	16.039	8.398	-0.93	9.4	0.157	-1.97926	7.8431	7.153	14.0254	-0.07		-0.252	5.6	11.681
1615	14.539	13.303	-3.151	-0.428049	16.023	8.543	-1.13	9.34	0.018	-0.474358	7.5254	6.674	13.2958	-1.26		-0.7761	5.28	10.5945
1614	15.464	14.568	-0.812	-0.182783	16.364	8.856	-1.53	9.16	-0.146	-0.796634	9.0536	6.934	11.9511	0.5		-1.1813	5.39	11.8264
1613	14.63	14.283	-1.663	-0.373832	16.36	9.002	-0.29	10.25	-0.583	0.147419	8.0976	6.67	11.5053	-1.16		-0.8678	5.5	11.1049
1612	14.887	14.536	1.093	-0.570301	16.525	8.852	-0.91	10.12	-1.421	-0.139555	7.2957	7.222	11.7411	-0.94		-0.4169	5.58	12.1248
1611	15.275	15.833	1.201	-0.605787	15.561	9.119	-0.49	10.1	-0.796	-1.32959	8.1917	7.085	10.0351	-1.12		-0.5108	5.68	11.2515
1610	14.852	14.457	-1.524	-0.333625	15.833	8.667	-0.42	9.71	-1.282	0.171333	7.6806	7.365	11.1036	0.02		-0.7343	5.72	10.3541
1609	14.757	15.023	-4.026	-0.472795	16.06	8.269	-1.1	9.12	-2.116	-0.118488	7.7509	7.201	11.6969	-0.21		-0.3268	5.43	11.2027
1608	13.941	15.152	-1.07	-0.617208	16.035	8.575	-1.09	9.31	-1.898	-0.156068	8.3559	7.169	11.0023	-0.01		-1.2624	5.23	10.6182
1607	13.948	14.278	0.874	-0.208099	16.035	8.639	-0.69	8.82	-2.166	-0.480052	8.2954	6.957	11.2849	-0.93		-0.1421	5.27	11.2027
1606	14.565	15.304	-0.353	-0.460089	15.215	9.01	-0.82	9.67	-2.255	-0.827382	7.7083	6.613	10.1582	-1.38		-0.9401	5.42	11.034
1605	14.584	13.859	-0.556	-0.186318	15.631	8.316	-0.8	9.07	-1.804	-0.792649	8.562	6.353	9.87037	-0.69		-0.9278	4.96	10.3086
1604	14.92	14.628	-0.84	-0.401705	15.372	8.728	-1.45	9.62	-1.63	-1.40759	7.434	6.44	10.416	-0.06		-0.836	5.55	10.4375
1603	15.495	13.979	-0.463	-0.28937	15.195	9.112	-1.43	10.28	-2.196	-2.51563	9.889	6.483	12.1888	-0.43		-1.1916	5.19	9.87675
1602	15.21	13.901	-2.699	-0.636381	15.85	8.59	-1.48	9.85	-2.826	-1.72304	8.1425	6.483	9.00629	-0.83		-1.7878	4.98	9.40815
1601	15.081	13.96	-0.704	-0.621593	13.724	8.087	-1.69	8.16	-3.074	-0.260836	4.7532	6.494	10.6544	-2.52		-0.5203	5.47	8.13865
1600	15.672	14.733	0.775	-0.431074	15.784	9.672	-1.18	10.7	-2.404	-0.663966	9.2113	6.647	10.9268	-0.53		-1.281	5.17	9.94756
1599	15.483	14.126	1.094	-0.319866	15.549	9.923	-0.84	11.26	-2.34	-0.340551	7.8692	6.722	12.8337	-0.22		-0.3882	5.4	9.24021
1598	15.165	14.071	0.863	-0.186078	15.009	9.141	-0.77	11.26	-2.493	0.0642875	8.7436	6.766	10.6739	-0.91		-0.5255	5.21	8.95544
1597	14.514	13.855	-1.432	0.0845784	15.401	9.496	-1.17	10.24	-2.27	0.629125	8.8856	7.454	10.7762	-1.39		-0.8093	5.38	9.55385
1596	14.869	14.333	-1.612	-0.105975	15.652	9.368	-1.05	10.22	-2.94	1.15866	6.4684	6.816	12.457	-1.8		-0.6355	5.26	9.96384
1595	15.235	14.563	0.302	-0.114225	14.894	9.352	-1.58	10.66	-1.739	0.646776	8.4867	7.197	10.4306	0.24		-0.6596	5.27	10.0503
1594	15.151	14.255	-0.237	-0.341366	14.836	9.527	-1.01	11.01	-1.813	0.638235	8.1991	7.493	13.1531	-0.86		-0.269	5.19	8.81671
1593	15.123	14.246	-2.962	-0.577889	14.297	8.838	-1.29	10.34	-1.739	-0.604749	8.6612	6.962	11.827	0		-0.9099	4.9	9.07957
1592	14.974	14.034	-0.688	-0.382975	14.985	9.108	-0.91	10.35	-1.501	-0.767595	8.2153	7.108	14.4559	-1.15		-0.2828	5.02	10.6807
1591	15.1	13.487	-0.247	-0.141439	14.845	8.514	-1.35	10.14	-1.724	-0.458415	8.2612	7.322	13.282	-0.14		-1.0514	4.87	10.7512
1590	15.07	13.942	0.731	-0.850955	14.103	8.388	-0.7	9.92	-0.871	-0.207882	8.5401	6.875	11.8754	-0.44		-0.7069	5.27	9.90693
1589	14.757	14.043	-3.68	-0.408287	13.267	8.886	-0.42	9.89	-1.312	1.06414	8.0102	6.551	12.0166	-1.31		-0.9639	5.09	7.77273
1588	14.936	14.26	0.672	-0.352812	14.861	8.631	-0.24	10.44	-2.374	-0.0387726	7.7348	6.674	11.1277	0.17		-0.7198	4.93	10.8158
1587	14.992	14.72	0.656	-0.257701	15.137	8.924	-1.19	9.62	-0.657	-0.127598	6.7349	6.585	12.4702	-1.62		-0.893	4.94	10.5866
1586	15.018	14.54	-0.21	-0.226844	15.487	9.257	-0.02	11.42	-0.091	-0.505675	8.1499	6.941	12.8716	0.17		-0.7267	5.43	10.3157
1585	15.446	14.191	-0.485	-0.306361	14.408	9.287	0.16	11.14	-0.349	-1.56588	7.5495	6.38	11.649	-1.02		-0.9007	5.44	9.39354
1584	15.446	14.048	0.944	-0.383489	14.882	9.098	0.06	10.51	-0.399	-0.944677	8.3446	7.003	10.5601	-0.61		-0.4313	5.53	10.0426
1583	15.142	14.448	1.487	0.201127	16.657	9.114	-0.3	11.89	-0.027	-1.26126	8.0285	7.349	11.6415	-0.43		-1.036	5.3	10.4872
1582	15.516	15.115	-0.388	0.214961	16.101	9.177	-0.15	11.48	-1.213	-1.06823	7.8593	7.231	10.895	-0.05		-0.7579	5.45	10.2447
1581	15.263	15.157	-2.751	-0.115271	15.619	8.905	-0.96	10.49	-1.64	-0.804037	7.3347	6.861	12.2358	-1.52		-0.7054	5.5	9.13798
1580	14.906	15.152	-1.883	-0.0930489	17.682	8.628	-1.13	9.89	-1.357	-0.223825	8.5191	6.62	12.0729	0.31		-0.2337	5.17	9.10878
1579	14.493	15.575	-2.538	0.162219	16.105	9.296	-1.39	11.09	-1.58	-0.412294	7.9614	6.85	11.9018	-1.16		-1.5866	5.38	10.1737
1578	14.418	14.913	-2.268	0.00242547	16.126	8.856	-0.5	10.2	-0.449	-0.0177051	7.7689	7.028	12.1233	0.51		0.0234	5.48	10.9248
1577	14.418	15.12	0.955	0.348073	15.635	9.248	-0.86	10.85	-1.005	0.460585	7.8327	6.665	12.7712	-0.41		-0.5258	5.59	9.33513
1576	14.829	15.488	-5.676	0.259431	16.995	9.765	-0.61	11.09	-0.374	0.413325	9.3176	6.654	11.7724	0.04		-0.9169	5.74	10.5085
1575	14.455	14.908	0.457	0.0660466	15.549	9.777	0.5	10.9	0.683	0.781722	8.8175	6.871	14.0097	-0.04		0.2837	5.56	10.3157
1574	14.918	14.853	-1.48	-0.064792	17.456	8.706	-0.53	10.21	0.077	-0.0285236	8.3402	6.665	13.7949	0.01		-1.0682	5.03	10.9007
1573	14.981	16.206	-1.275	-0.0584026	16.031	9.836	-0.47	10.64	0.464	-0.624108	8.7132	6.734	12.6384	-0.71		-1.4637	5.6	10.4872
1572	14.822	15.152	0.585	-0.388483	15.936	9.624	-0.1	10.89	0.837	-1.08759	8.4128	6.426	11.6764	-0.09		-0.6442	5.45	10.3309
1571	15.385	15.143	-2.292	0.144464	16.237	9.513	0.09	10.52	-0.255	-0.373576	8.2476	6.554	11.6069	-1.39		0.0254	5.35	10.0503
1570	14.88	14.968	-2.499	-0.303221	16.261	10.203	0.31	11.32	0.489	-0.909374	9.1021	6.752	12.3162	-1.15		-0.5367	5.66	9.93942
1569	14.906	13.979	-4.027	-0.172912	15.763	10.17	-0.55	12.25	0.549	-0.764748	8.4389	6.574	12.5234	-0.64		-0.9705	5.71	9.38624
1568	15.217	13.574	-0.299	0.369103	16.212	9.845	-0.25	10.59	0.846	-0.432792	8.9171	6.652	11.8803	-1.5		-0.3828	5.71	10.3157
1567	15.191	14.848	1.697	-0.260048	16.142	10.113	-0.45	10.34	0.052	-2.092	8.542	6.652	11.9413	0.05		-0.5774	5.5	10.8077
1566	15.432	15.483	0.998	0.100278	15.289	10.645	-0.4	11.75	0.425	-2.05044	8.0851	7.231	11.7517	-0.85		-0.4346	5.42	10.5156
1565	14.75	13.91	0.135	-0.360322	16.562	11.092	0.08	11.8	0.191	-0.823965	8.6684	7.577	12.6572	0.61		-0.5184	5.35	10.4446
1564	14.808	13.62	-0.859	-0.157702	15.565	11.054	1.04	11.94	0.211	-1.00219	8.6534	7.238	11.7894	0.36		-0.0565	5.26	10.385
1563	14.595	14.802	-1.704	-0.198916	15.833	10.576	-0.04	11.5	0.281	-1.26809	8.2081	7.037	12.5198	-1.3		-0.0545	5.49	10.84
1562	14.637	14.352	-1.355	0.0167069	15.549	11.108	0.29	11.64	1.427	-1.24873	8.8556	7.313	12.7515	-0.27		-0.4483	5.58	10.2092
1561	14.845	15.056	0.9	-0.173536	16.78	10.103	0.69	11.29	1.71	-1.50951	8.7615	7.372	12.9978	-1.2		0.3178	5.1	10.9664
1560	14.668	14.531	-6.36	0.0618139	16.336	10.617	0.38	11.32	0.33	-1.64958	8.3393	7.231	12.0417	-0.67		-0.0943	5.59	10.84
1559	14.81	14.614	0.867	-0.188866	15.067	10.273	0.27	10.87	0.315	-2.10111	7.799	7.771	10.5302	-1.03		0.4499	5.71	10.385
1558	14.887	15.129	-1.409	0.0948024	15.475	10.239	0.77	11.66	0.261	-0.830229	8.5388	7.874	12.0668	-0.58		0.5706	5.55	10.832
1557	14.684	14.494	-0.551	0.264262	15.306	9.81	-0.07	10.31	0.122	-1.42126	7.3088	6.802	11.1931	0.03		0.2933	5.69	11.2655
1556	14.703	14.503	-0.436	0.0760558	15.537	10.165	0.34	10.56	0.549	-2.691	7.8493	7.386	10.9241	-0.96		0.5218	5.7	9.99632
1555	14.745	14.048	-3.315	0.118309	14.915	10.218	0.01	10.59	0.315	-1.07279	8.4045	7.242	12.2244	-0.04		-0.8269	5.76	10.385
1554	15.364	14.195	0.162	0.0458038	15.059	9.862	-0.45	10.49	-0.434	-2.014	8.6438	7.032	11.3179	-1.22		-0.0103	5.83	9.40815
1553	15.228	15.286	-0.661	-0.273722	15.252	10.754	0.13	11.18	0.807	-1.13087	7.7848	6.957	11.8791	-1.65		0.2379	5.98	9.69569
1552	15.354	14.871	-0.848	0.322662	16.13	10.096	-0.69	11.01	0.549	-2.51449	8.3769	6.679	10.9668	-0.35		-0.1847	6.25	11.1328
1551	15.233	15.102	-0.117	0.402619	16.912	10.662	-0.09	11.35	0.206	-2.31122	7.9821	7.411	11.6513	-0.84		0.1283	5.91	10.7512
1550	15.207	15.327	-2.129	0.262976	16.224	10.244	-0.23	10.53	-0.622	-0.637774	7.7878	7.092	10.9687	-0.14		-0.527	5.99	10.5582
1549	15.611	14.605	-0.49	0.469393	16.541	10.314	-0.11	10.17	-0.429	-0.512507	7.399	6.67	11.1939	-0.63		-0.6747	5.48	10.0349
1548	15.959	15.686	-0.476	0.00915074	17.205	10.766	-0.28	10.97	0.132	-0.629802	8.6591	7.094	11.9162	-0.18		0.0033	5.72	9.78622
1547	15.871	15.727	0.259	0.461995	16.566	10.185	-0.06	11.26	-0.498	-0.0894486	7.7397	7.315	11.8224	-0.67		0.1511	5.99	9.99632
1546	15.261	15.226	-0.437	0.429111	15.149	10.493	-0.17	11.24	-0.816	-0.51023	7.4899	7.315	11.1879	-1.15		-0.0954	6.31	8.45994
1545	14.913	14.715	-1.206	0.696407	15.998	9.94	-0.02	11.86	-1.144	-0.35991	7.9652	7.349	13.0107	0.21		0.5917	5.9	10.0426
1544	14.46	14.531	-1.556	0.0335596	16.579	9.945	-0.54	10.46	-0.995	0.255603	7.1117	7.165	12.9418	-1.68		-0.8125	5.88	10.8158
1543	14.71	14.103	-1.53	0.425943	16.636	9.961	-0.06	10.61	-1.223	-1.13713	7.5543	6.665	12.4978	-0.34		-0.1416	5.81	10.2447
1542	15.7	13.983	-1.696	0.314141	15.462	10.177	-0.28	10.54	-1.392	-1.15934	7.8772	6.389	12.2776	-1.69		-0.0683	6.48	9.56186
1541	14.782	14.296	0.736	0.470055	16.743	9.782	0.31	11.1	-0.826	-0.216423	7.1954	7.076	12.879	-0.53		0.5878	6.17	10.3541
1540	14.535	14.301	1.212	0.206726	16.677	9.907	0.38	10.98	0.216	-1.24816	7.0565	6.973	14.2567	-1.21		1.2251	6.3	9.99632
1539	14.915	14.154	0.444	-0.199799	16.488	10.704	0.77	11.47	-0.25	-0.647453	7.0219	7.231	13.6888	-1.21		0.6344	5.76	10.3232
1538	14.92	14.011	-0.297	0.328962	16.636	10.405	-0.12	11.45	-1.273	-0.471511	7.2071	7.16	11.9066	-0.92		0.589	5.78	10.5156
1537	15.368	14.416	-0.386	-0.0680098	15.994	9.774	-0.01	11.67	-1.148	0.322792	7.4094	7.425	12.5375	-0.7		0.5184	6.02	8.82401
1536	15.14	13.629	0.309	0.280972	15.887	9.764	-0.43	10.89	-1.665	-0.0199827	6.4707	7.238	13.5874	-1.26		0.5476	5.97	10.1429
1535	14.985	13.983	-3.002	0.333514	16.628	10.743	0.37	11.41	-0.995	-1.65699	8.4029	7.324	12.3206	-1.14		-0.2742	5.8	11.2236
1534	15.193	13.947	-2.867	0.355761	15.277	10.115	0.13	11.55	-0.965	-0.239199	7.913	6.72	12.2846	-1.14		-0.1486	6.02	9.83903
1533	15.681	14.365	-1.135	0.212315	15.046	10.255	0.63	12.08	-1.382	-0.0410502	7.8518	6.658	13.2696	0.59		-0.6882	5.59	8.47447
1532	15.506	13.813	-0.453	0.161864	15.907	10.053	0.07	11.98	-0.533	-2.07037	8.3552	6.49	13.0621	-0.61		0.5232	6.19	10.2802
1531	15.128	14.513	-2.44	-0.136462	16.616	9.468	0.38	10.95	-0.692	-0.480052	9.2479	6.907	12.379	0.07		0.2865	5.75	11.2725
1530	14.745	14.029	-3.012	0.116036	15.726	9.347	-0.3	10.45	-0.955	-0.743111	8.738	7.283	11.8209	-0.4		-0.1214	6.27	10.8481
1529	14.948	14.163	-6.024	0.0768936	16.731	9.16	-0.55	10.51	-0.32	-0.24774	8.1152	7.103	12.4849	-0.26		-0.647	6.25	11.5414
1528	14.813	14.862	-3.159	0.0937248	16.167	9.689	0.11	10.49	-0.672	-0.964036	8.2315	6.572	11.7357	0.7		-0.734	5.87	10.5945
1527	14.514	13.634	-1.668	-0.159815	16.426	9.275	-0.48	10.16	-0.27	-0.0245378	9.3511	6.697	12.4969	-0.78		-0.0653	6.34	11.1328
1526	14.794	13.247	-3.324	0.0546329	15.273	10.138	0.29	10.67	-0.052	0.129198	7.8018	7.224	12.1815	-0.86		0.7557	5.87	10.004
1525	15.191	13.905	-1.298	0.567447	16.014	9.795	0.02	10.95	-0.29	-0.865531	8.5132	6.959	12.8668	-1.02		0.2096	5.68	11.3144
1524	14.866	14.103	-3.93	0.286628	15.051	9.506	-0.68	9.65	-1.019	-1.33471	7.6915	7.286	13.4036	-1.25		-0.1216	6.22	10.3086
1523	14.635	13.855	-2.148	0.0999784	16.175	10.72	0.12	10.91	-1.198	-0.773289	7.4158	7.568	12.0106	-1.18		-0.3709	6.18	10.8714
1522	14.794	13.845	0.37	0.353729	15.808	9.895	-0.23	10.66	-0.93	-0.945246	8.4651	6.882	11.6743	-1.72		-0.0062	5.65	10.8934
1521	14.481	13.786	-0.825	0.496917	16.187	9.868	0.49	11.03	-0.082	-0.464678	7.5023	6.809	11.5644	-0.7		0.1657	6.44	11.3353
1520	14.85	13.321	-0.383	-0.22468	17.2	10.012	-0.6	10.53	-0.012	-1.24645	7.4492	7.053	12.3821	-1.27		0.1783	5.58	11.1189
1519	14.238	13.648	-0.568	-0.271862	17.39	10.401	0.76	10.66	0.256	-2.38296	7.9878	7.062	11.9873	-0.45		0.277	5.86	11.3772
1518	14.703	13.56	0.744	0.171124	17.571	10.589	0.37	10.97	-0.091	-1.79421	8.0781	6.768	11.0894	-0.82		-0.3265	5.79	11.5193
1517	15.149	14.131	0.11	0.197326	16.892	10.591	0.04	10.64	-0.345	-0.879196	9.2923	6.98	13.0106	-0.49		0.16	5.48	10.886
1516	14.841	14.094	-1.008	-0.0837739	17.439	9.465	-0.44	9.23	0.023	-0.308665	8.178	6.522	12.1943	-1.36		0.1735	5.67	11.1259
1515	15.294	13.464	-1.291	0.302117	16.307	10.495	0.99	11.11	-0.563	-0.771581	8.4621	6.8	11.9611	-0.2		-0.0151	5.67	10.3157
1514	15.006	14.425	0.057	0.0594832	16.784	9.962	0.53	9.59	0.162	-2.07777	7.1711	7.418	12.7233	-0.98		0.0336	5.71	10.5724
1513	15.126	14.559	0.54	-0.41265	15.359	10.465	0.42	11.02	0.459	-1.1787	9.0595	6.994	12.1834	-0.32		0.4275	5	9.77868
1512	15.411	15.534	0.17	-0.0198575	15.656	10.762	0.49	11.16	0.554	-0.318344	9.8451	7.365	12.8939	-1.09		0.2121	5.71	10.5369
1511	14.577	15.198	0.489	-0.20444	15.771	10.338	0.78	11.2	-0.598	-1.19521	9.1566	7.156	13.5633	-0.52		0.0128	6.13	11.1398
1510	15.077	14.729	1.52	-0.37167	14.828	10.055	-0.06	10.09	0.598	-1.8967	9.5913	6.611	13.6071	0.11		0.5564	6.73	10.9498
1509	15.408	15.626	-2.223	-0.361006	15.479	10.143	0.44	10.36	0.147	-1.2624	9.1913	6.312	11.9394	-1.02		0.7945	6.29	11.0125
1508	15.305	14.352	-1.194	0.397563	15.907	10.362	0.65	11.3	0.315	-2.35563	9.5685	6.574	12.8006	-0.1		0.6955	6.11	10.5866
1507	14.873	15.479	2.254	0.0203122	17.365	10.399	-0.18	10.37	0.306	-3.55193	9.0669	6.809	11.4586	-0.73		0.9063	5.6	10.6951
1506	14.988	15.341	1.4	-0.0704476	16.406	10.491	0.66	10.86	-0.34	-2.63919	8.7688	6.809	12.967	-0.42		0.9544	5.62	10.6103
1505	15.56	15.074	0.989	-0.661621	15.252	10.545	0.91	11.38	-0.206	-2.78609	7.6744	6.485	12.8314	-1		0.5863	5.61	10.0426
1504	15.338	15.368	0.044	-0.258373	16.369	10.714	0.54	10.55	0.023	-1.95535	7.9795	6.964	13.3926	-1		0.491	5.15	10.9007
1503	14.957	15.023	-0.905	0.0675589	15.944	9.741	0.67	10.47	0.311	-2.03279	7.5815	6.741	12.3298	-1.22		0.3697	5.33	10.7916
1502	14.514	16.302	-2.673	-0.340279	16.883	10.411	0.88	11.22	0.43	-1.12176	8.1633	6.647	12.9176	0.11		0.876	5.82	10.3541
1501	14.824	15.723	1.181	-0.0797489	16.327	11.056	0.06	11.21	0.499	-1.01642	8.8587	6.72	12.6825	-0.94		0.5751	5.99	10.1352
1500	14.705	15.718	-1.215	-0.0346253	17.126	10.852	0.01	11.15	0.023	-0.493148	8.0992	7.153	12.1055	-1.67		0.8843	5.58	10.4517
1499	15.434	16.022	-1.389	0.00114461	16.154	10.468	0.48	10.8	-0.518	-1.24475	8.0056	7.064	14.5152	-1.14		0.1698	5.52	10.2731
1498	15.245	15.566	0.951	-0.255586	14.565	9.967	0.32	10.81	-0.662	-0.845033	7.888	6.693	12.8842	-1.09		0.6311	5.53	9.72587
1497	15.383	14.807	1.663	-0.252054	14.606	10.347	-1.37	10.34	-2.22	-0.911082	7.9029	6.839	13.9999	-1.57		0.5008	5.4	9.84658
1496	15.137	15.801	1.166	-0.0633153	15.668	10.622	1.16	11.62	-0.687	-0.648592	7.7501	6.775	14.011	-0.74		0.6056	5.88	9.83149
1495	15.52	14.867	0.711	-0.999437	14.939	10.124	-0.27	10.47	-0.975	-0.534144	8.8084	6.225	12.34	-2.17		0.7096	5.85	9.77113
1494	16.013	16.197	-1.076	-0.256807	15.475	10.655	0.6	11.86	-0.9	-1.84432	7.7272	6.43	12.7869	-0.74		0.6148	5.82	10.1352
1493	15.78	15.92	-0.386	0.0397824	15.322	10.533	-0.3	11.01	-1.719	-1.05628	7.5199	6.41	12.7194	-0.89		0.907	5.97	10.385
1492	15.674	15.281	0.205	-0.507763	15.891	9.885	0.28	11.12	-0.831	-0.946954	8.9251	6.581	12.6964	-0.02		0.9151	5.73	10.1584
1491	15.38	15.585	0.318	-0.470577	16.373	10.394	-0.32	11.61	-0.399	-1.10012	7.2836	6.654	12.8569	-2.31		-0.4693	5.41	10.195
1490	15.242	15.152	0.486	-0.202852	17.217	10.347	0.1	11.46	-0.141	-1.04204	7.8245	6.907	13.4653	-0.52		-0.0949	5.65	10.9747
1489	15.691	15.226	1.584	0.368695	16.71	10.567	-0.39	11.35	-0.3	-0.605888	8.8125	7.087	13.4759	-1.33		-0.0509	5.83	10.727
1488	15.962	15.373	0.227	-0.0816727	16.677	10.295	-1.23	10.92	-0.131	-0.730585	7.7249	7.411	12.3242	-1.39		-0.6169	5.52	10.4304
1487	15.282	15.548	-0.208	-0.208625	15.99	9.873	-0.85	10.28	0.569	-1.44973	8.5699	6.544	14.0524	-0.42		0.1388	5.01	10.634
1486	15.235	14.655	0.13	-0.141721	15.883	9.644	-0.81	10.14	-0.047	-1.54766	7.5689	6.766	12.2661	-0.84		-0.1161	5.4	10.8562
1485	15.427	15.065	-1.876	-0.0651991	16.41	10.739	0.29	11.41	-1.66	-2.43762	7.7703	7.067	12.0477	-0.5		-0.1629	5.28	10.9664
1484	15.119	14.605	-0.329	-0.666229	16.385	9.425	0.18	10.52	0.172	-2.33001	7.4387	6.581	11.926	-0.52		-0.149	5.37	10.9331
1483	15.275	14.894	-2.558	-0.0402959	15.195	9.385	-0.01	9.85	-0.161	-2.09542	6.4784	6.943	12.2905	-2.01		-0.651	5.18	10.195
1482	16.081	14.554	1.289	0.00186379	16.327	9.623	-0.51	10.45	-0.786	-2.1962	8.1098	7.076	12.7028	-0.41		-1.2161	5.47	10.7431
1481	15.796	15.539	-5.392	-0.451012	15.331	9.751	-0.67	11.29	-0.245	-2.23037	7.4946	6.419	13.3198	-1.54		-0.9766	5.59	9.7485
1480	15.754	15.506	2.389	-0.42309	15.615	9.828	-0.22	10.68	-0.161	-2.49001	7.6967	6.2	11.9785	-0.53		-0.9288	5.73	9.64195
1479	15.726	15.382	1.681	-0.17276	14.26	9.813	-0.23	10.81	-0.791	-1.85115	7.9281	6.403	13.5299	-0.94		-0.5778	5.31	9.66551
1478	15.532	15.143	1.719	-0.364891	15.874	9.237	-0.73	9.5	-0.92	-1.97186	7.7446	6.743	14.5417	-0.72		-1.1183	5.36	10.0735
1477	15.315	14.871	-3.26	-0.142404	16.187	9.38	-0.02	10.06	-0.89	-2.54012	7.4785	6.262	12.8189	-0.79		-1.5311	5.39	10.2589
1476	14.764	15.336	2.684	-0.515182	16.002	9.311	0.24	9.75	-0.364	-2.24802	7.1218	6.408	14.3091	-0.41		-0.2674	5.17	10.3309
1475	14.287	14.154	0.255	-0.457066	16.34	9.235	-0.16	10.54	-1.173	-1.62339	6.9661	6.403	12.9257	-0.79		0.0346	5.13	10.2589
1474	14.836	14.425	1.729	-0.328233	15.561	9.637	-0.04	10.34	-0.786	-2.71947	7.1415	6.335	10.308	-1.72		-1.0663	5.65	10.4004
1473	14.89	14.315	2.483	-0.499958	15.129	9.094	-0.62	9.69	-1.139	-1.35749	7.0031	6.882	10.9016	-0.37		0.2457	5.25	10.3927
1472	15.03	14.816	0.083	-0.366622	14.927	9.406	-0.31	9.9	-1.6	-1.64104	5.3641	6.373	10.8638	-2.18		-0.8225	5.42	9.89939
1471	15.133	14.605	-1.005	-0.506245	14.639	10.191	-0.48	10.39	-1.784	-1.31137	7.5856	6.469	11.8235	-0.25		-0.2476	5.14	9.99632
1470	15.436	14.209	-0.339	-0.607775	14.976	10.446	-1.07	11.64	-2.081	-1.06425	7.7012	6.613	9.65125	-0.59		-0.4836	5.37	9.74096
1469	15.006	14.867	-1.346	-0.217268	14.688	9.877	-0.71	10.71	-2.518	-0.605888	7.7026	6.303	9.85469	-0.84		-1.2221	5.32	10.2518
1468	15.383	14.559	-1.223	-0.583511	15.018	9.976	-0.83	10.95	-1.997	-0.802328	6.7627	6.638	9.87583	-1.82		-0.8791	5.29	10.0118
1467	15.154	14.154	-3.063	-0.654096	14.659	9.756	-0.65	10.26	-1.843	-1.95933	7.7876	6.843	9.62127	-1.28		-0.7742	5.34	10.0889
1466	14.953	15.097	-4.041	-0.393095	14.635	9.725	-0.25	9.8	-2.384	-1.59265	7.4241	6.061	12.0924	-1.29		-0.0251	5.5	9.6806
1465	14.757	14.595	2.599	-0.50128	14.985	9.701	-0.38	10.27	-2.042	-1.62168	7.2566	6.672	9.22553	-1.23		-0.2816	5.66	10.0658
1464	14.876	14.743	-0.834	0.00946556	14.598	9.512	-1.09	9.97	-1.511	-2.96602	6.9217	6.807	10.7396	-1.34		-0.1355	5.54	9.8164
1463	15.058	13.873	-0.413	-0.226698	14.762	9.439	-0.87	9.47	-1.545	-1.21742	7.2736	6.524	10.8349	-0.92		0.1362	5.52	9.41545
1462	14.705	14.66	-1.167	0.0163415	14.519	9.856	-0.51	9.8	-1.416	-1.89499	7.642	7.039	10.9316	-0.72		0.2852	5.11	9.96384
1461	14.978	14.016	-0.196	-0.186197	15.833	9.429	-1.5	9.36	-0.573	-2.26681	6.544	7.358	12.541	-1.69		0.0675	4.97	9.96384
1460	14.866	14.563	-3.412	-0.144038	14.985	9.363	-0.37	9.74	-0.851	-1.95307	7.2165	7.466	12.3056	-0.39		-0.735	5.41	9.94756
1459	14.593	14.775	-3.625	-0.299481	14.458	9.588	-0.44	9.06	-1.506	-1.82154	6.4111	7.078	12.6738	-1.68		-0.7693	5.67	9.01386
1458	14.194	14.034	-2.744	-0.135783	15.623	9.978	-0.56	9.43	-1.481	-0.563183	5.2409	6.941	12.4958	-0.56		-0.5167	5.99	9.51381
1457	14.834	13.629	-0.121	-0.696881	15.549	9.134	-0.93	9.27	-1.63	-1.23962	6.6083	6.401	12.1685	-0.96		-0.3024	5.62	10.3232
1456	15.046	14.411	-5.252	-0.545049	15.911	9.55	-0.93	9.8	-1.61	-0.98795	6.8103	6.223	13.1618	-0.49		-0.5985	4.68	10.4004
1455	15.109	14.264	-2.904	-0.594909	15.998	9.757	-1.19	9.84	-1.59	-1.0745	7.3805	6.321	11.7089	-0.68		-0.9686	5.36	10.385
1454	15.392	14.453	-1.138	-0.461124	14.729	9.806	-0.47	9.64	-1.496	-1.7498	7.2583	6.17	12.1667	-0.28		-0.367	5.88	9.5058
1453	15.34	14.172	-6.023	-0.90368	15.364	9.393	-1.62	8.67	-1.029	-1.85343	7.2046	6.695	11.5795	-0.38		-0.5945	5.41	9.84658
1452	14.717	14.927	-2.502	-0.0418043	16.591	10.434	-0.35	10.56	-0.885	-1.81756	7.2973	6.741	13.5307	-0.64		-0.2056	5.49	10.4659
1451	14.509	14.434	-2.626	0.0493337	16.2	10.426	0.47	11.15	-1.104	-1.21628	7.0535	6.538	11.7522	-1.24		-0.3792	5.76	10.1352
1450	14.523	14.641	-3.409	-0.369249	13.939	11.16	-0.06	12.08	-0.498	-0.384394	6.6326	6.332	12.7478	-0.35		0.1755	5.26	9.9557
1449	14.616	15.879	-2.054	-0.372826	16.459	10.151	0.14	11.1	-0.697	-1.2345	7.6788	6.772	14.2872	-1.09		-0.4012	4.61	10.7431
1448	15.189	14.582	-2.005	-0.00424353	15.953	10.043	-0.52	11.37	-0.349	-1.56645	6.7555	6.433	14.1373	-0.92		-1.1504	5.43	9.9557
1447	15.562	15.18	-0.122	-0.278469	15.973	10.132	-0.49	10.98	-0.23	-1.34097	8.3242	6.836	13.4569	-0.41		-0.7148	5.74	11.5854
1446	16.032	14.963	-1.554	0.261045	15.219	10.343	-0.18	11.08	-0.642	-1.2698	9.0308	6.877	11.1794	0.11		-0.3395	5.52	10.4081
1445	16.001	14.655	2.561	0.333086	15.998	10.43	-0.23	11.55	0.261	-1.78168	7.9371	6.478	12.6685	-1.84		-0.9229	5.68	10.8714
1444	15.548	15.575	1.268	0.13739	15.598	10.098	-0.05	10.82	0.102	-2.56346	8.9281	6.296	11.4734	-0.05		-0.5652	5.85	10.6807
1443	14.936	15.276	2.616	0.334983	16.406	10.103	-0.22	10.98	-0.002	-1.62966	8.0448	6.649	13.5761	-0.35		-1.3507	5.82	10.7512
1442	14.682	14.738	0.924	0.351352	16.117	10.547	0.14	10.81	0.306	-1.55051	8.2008	6.59	13.8867	-1.2		-1.1347	5.73	9.79377
1441	15.135	15.428	-2.452	-0.00777263	15.244	10.64	0.25	11.09	-0.568	-1.23336	7.8366	6.503	13.6402	-0.46		-1.9455	5.44	10.3927
1440	14.67	15.244	-0.664	0.33499	15.932	10.633	-0.23	10.73	-0.032	-0.671368	7.9995	6.524	13.1177	0.35		-0.9978	5.48	10.5795
1439	14.841	15.424	0.784	0.223591	16.241	10.227	-0.26	10.86	-0.245	-0.676493	8.4048	7.233	13.1211	0.44		-1.5019	5.73	10.5653
1438	15.42	15.47	0.447	0.349169	16.653	10.829	-0.36	10.74	-0.846	0.197525	7.2777	7.372	13.318	-1.44		-1.4868	5.6	10.0349
1437	15.597	15.962	1.482	0.0746455	14.614	10.606	0.13	11.19	-0.717	-0.867239	8.8739	6.978	12.8991	0.33		-0.7461	5.77	9.72587
1436	16.331	15.884	1.429	-0.0989929	16.093	10.723	0.32	11.03	-0.608	-0.173149	8.7685	7.14	12.5509	0.72		-1.0571	5.33	8.80941
1435	16.027	15.41	-1.768	-0.309688	17.073	10.672	0.22	11.46	-0.583	-0.962897	8.027	6.756	13.8685	-1.2		-0.4993	5.33	10.1429
1434	15.137	15.161	1.737	0.269606	16.253	10.747	0.46	12.3	0.033	-1.7424	8.3965	6.766	13.2589	1.61		-0.0954	5.78	10.6103
1433	15.277	14.95	-2.569	-0.0718877	16.562	10.443	0.06	11.38	0.211	-0.700976	9.2834	6.572	12.1112	1.18		-0.6556	5.2	10.3232
1432	15.046	14.545	0.876	0.518412	16.385	10.256	0.35	11.2	-0.201	-1.42581	9.0385	7.441	13.4625	-0.11		-0.8347	5.28	10.6807
1431	15.086	14.08	1.745	0.224958	17.649	10.018	0.62	11	0.266	-1.29087	8.5397	7.096	12.4712	0.07		-1.1934	5.35	11.034
1430	15.567	14.904	-0.254	0.0778918	16.286	10.023	-0.1	10.37	-1.005	-0.7824	8.5528	7.026	12.8028	0.6		-0.2779	5.6	10.4943
1429	15.446	15.157	-0.695	0.0372566	16.801	9.85	0.28	11.56	-0.096	-0.824535	7.8598	7.064	11.107	-0.16		-0.3427	5.35	11.1468
1428	15.576	14.586	1.639	0.0603412	16.739	10.303	-0.22	11.04	-0.325	-1.48218	8.7561	7.429	11.5203	0.23		-0.8187	5.34	11.084
1427	15.34	14.425	1.189	0.300018	15.924	10.074	0.45	10.75	0.018	-2.04531	7.9027	7.438	11.869	-0.25		-0.0341	5.82	10.9498
1426	15.063	14.614	1.158	0.156973	17.299	10.327	-0.26	10.81	-0.106	-2.12047	8.5911	7.187	12.2128	0.46		-0.459	4.83	10.7997
1425	14.808	13.896	1.154	0.172485	17.192	11.106	0.16	11.87	0.067	-0.679909	7.4007	6.677	14.0709	-0.76		-0.746	5.34	11.1328
1424	15.013	13.344	-0.141	0.182759	16.817	10.815	0.12	12.02	1.065	-1.07336	8.4231	7.06	11.272	0.37		-0.4898	5.45	11.1678
1423	15.572	14.48	-1.325	-0.476932	16.521	9.917	-1.01	10.62	0.395	-0.685603	8.1232	6.661	12.8256	-1.12		-0.7206	5.37	10.727
1422	15.987	13.707	-2.327	0.570611	17.102	10.336	0.02	10.52	0.301	-1.88759	8.4506	6.715	12.3047	-0.14		0.0043	5.21	11.1957
1421	15.567	14.434	-1.353	0.0523952	17.312	10.695	-1.04	11.4	0.916	-0.498842	8.4192	6.964	11.8033	-0.13		-0.8174	5.25	11.6958
1420	15.385	14.568	-2.568	0.434257	17.213	11.198	0.35	10.89	-0.469	-1.6735	7.4811	6.909	10.9062	-1.12		0.1721	5.37	11.4907
1419	15.548	14.701	0.534	-0.0510751	15.722	11.473	-0.57	10.87	-0.042	-0.975424	8.8981	7.13	11.7758	-0.45		-0.157	5.27	10.9248
1418	15.469	14.609	1.094	0.43696	17.06	10.738	0.7	10.99	0.355	-1.19065	8.5166	6.544	11.4725	1.22		0.3202	5.37	11.2655
1417	15.378	14.559	0.375	0.387578	15.977	11.291	0.02	11.45	-0.25	-1.56702	6.8306	6.478	11.0048	-0.19		0.4288	5.64	11.0197
1416	15.315	13.891	0.276	0.276292	15.804	10.659	0.07	11.1	-0.483	-0.81941	8.5504	6.772	11.2623	-0.94	-0.69	0.5047	5.23	10.7027
1415	15.492	13.901	0.156	0.40486	16.084	10.539	0.03	11.19	0.102	-1.18496	8.2106	6.275	12.5717	-0.08	0.66	0.5582	5.32	10.8934
1414	14.992	13.965	-3.339	0.312677	17.336	10.621	-0.37	11.17	-0.181	-1.32788	7.831	6.351	11.9709	-0.72	0.11	0.2418	5.54	10.8481
1413	14.953	15.778	-0.013	0.727735	16.117	11.082	0.32	11.53	0.951	-1.41727	8.5482	6.257	12.3491	-0.85	0.19	0.6345	5.73	10.3927
1412	14.479	14.043	-2.48	0.248357	17.48	10.883	-0.44	10.84	0.231	-1.96446	8.3762	6.631	11.3914	-0.33	-0.15	0.4212	5.57	10.6951
1411	15.081	14.678	-0.623	0.441372	15.265	11.722	0.52	12.25	0.003	-0.370159	8.2426	6.656	13.0497	-0.23	-0.46	0.2365	5.6	9.68815
1410	15.245	14.591	0.096	0.325266	16.48	11.152	0.63	10.91	0.097	0.247632	8.7255	6.727	10.2815	0.66	-0.78	0.449	5.46	10.0966
1409	15.674	14.614	-1.021	0.366686	17.065	11.51	0.87	11.74	0.489	0.0232912	8.1184	6.526	12.0231	-0.56	0.89	0.3886	5.9	10.7674
1408	15.714	13.919	-2.285	0.0637181	17.246	11.053	0.33	11.23	0.157	0.0386648	7.7446	6.82	12.1502	0.77	-0.21	-0.5489	5.2	10.7835
1407	15.242	14.029	1.816	-0.189109	17.159	10.843	0	11.11	0.072	0.0546078	8.504	6.41	11.7504	-0.82	0.29	0.3095	5.45	10.5945
1406	15.45	13.937	1.408	-0.0396387	16.805	10.748	0.42	11.82	-0.831	0.60578	8.7869	6.647	12.4055	0.08	-0.07	0.3436	5.54	10.1661
1405	15.193	15.424	-0.656	0.0544084	16.163	10.76	-0.21	11.11	0.44	-0.65998	7.7487	6.398	12.1389	0.01	-1.94	-0.3749	5.61	10.1661
1404	14.168	15.166	0.24	0.214172	16.027	10.134	-0.02	11.34	0.415	-1.50951	8.8545	6.259	12.3	0.03	-1.06	-0.0524	5.7	9.63394
1403	14.551	14.6	-0.24	-0.650228	17.443	9.83	0.31	10.52	1.085	-0.520479	8.232	6.127	11.9305	0.95	-0.38	-0.4421	5.13	10.1879
1402	14.808	14.876	-4.262	0.0549861	15.59	9.531	0.62	10.59	0.38	-0.156068	8.6224	6.444	12.7725	0.75	0.01	-0.8794	5.48	7.91462
1401	14.768	14.729	-2.917	-0.533978	15.829	9.102	0.38	10.01	0.112	-1.04375	8.8608	6.296	12.3979	0	-0.38	-0.7989	5.4	9.94756
1400	14.88	14.361	-0.122	-0.140201	16.834	9.061	0.09	9.24	-0.335	-0.73514	8.2708	6.047	12.8315	-0.46	1.01	-0.1772	5.63	10.8714
1399	15.168	15.589	-2.496	-0.143368	16.257	9.797	-0.02	10.34	-0.553	-0.595069	7.1734	6.303	13.7479	0.16	0.26	-0.9204	5.46	10.1584
1398	15.959	16.206	-1.879	0.044948	15.792	9.548	0.01	9.85	-0.622	-1.17927	9.3258	6.396	13.3668	0.68	0.14	-0.7755	5.25	10.2802
1397	15.733	15.525	-1.145	-0.0257902	15.38	9.634	0.34	9.82	-0.399	-2.51563	8.6931	6.597	12.9365	-0.39	-0.58	-0.6387	5.52	9.98013
1396	16.034	16.532	-1.358	0.2169	15.714	10.406	0.35	10.96	-0.826	-1.86709	8.5491	6.743	12.6394	-0.17	-0.69	-0.8225	5.43	10.195
1395	15.429	16.505	-0.067	0.0697282	14.194	9.46	0.16	10.05	-0.766	-1.87108	8.9534	6.528	12.3738	-0.1	-1.23	-0.6562	5.69	8.49625
1394	15.665	15.925	-0.966	0.32791	15.648	9.62	-0.35	9.67	-0.444	-1.21058	8.9425	7.482	11.1055	0.57	-0.56	-1.3639	6.01	10.4375
1393	15.523	14.761	-0.849	0.0187762	15.343	9.642	-0.1	10.14	-0.042	-0.709517	8.2518	7.644	10.7807	-0.55	0.94	-0.1217	5.97	10.0272
1392	14.864	14.632	-4.268	-0.0326102	16.698	9.453	-0.45	10.33	-1.342	-1.24418	8.8568	7.283	11.2229	0.4	-0.18	-0.702	5.52	10.2305
1391	14.948	13.845	-0.992	-0.0152835	17.019	10.096	0.13	10.72	-0.082	-1.31307	9.2813	7.685	11.5459	0.41	-2.24	-0.6965	5.35	10.3772
1390	15.616	14.168	-1.301	0.0650912	16.962	9.644	1.17	10.01	-0.389	-1.97869	8.7536	7.146	11.0603	-0.11	-0.06	-0.11	5.46	10.0658
1389	15.698	14.264	-1.972	0.156917	16.599	9.034	-0.38	9.59	-0.067	0.104145	8.5793	6.886	11.5102	-0.67	-0.25	-0.9855	5.45	10.0195
1388	15.273	13.937	-0.317	0.310814	15.804	9.502	0.09	9.9	-0.196	0.159945	8.5244	6.731	11.3893	-0.36	-0.83	-0.233	5.2	9.2037
1387	15.418	14.71	-4.035	0.159477	17.135	10.028	-0.23	10.93	0.296	-0.586528	8.855	7.815	11.2854	0.34	-0.53	-1.0057	5.32	10.4375
1386	15.156	14.283	-1.628	-0.183128	16.64	9.986	0.55	10.47	1.154	-0.806883	8.405	8.239	10.2679	-0.37	0.09	-0.5002	5.29	10.8562
1385	15.289	14.858	1.292	-0.661291	16.797	9.432	-0.2	9.55	0.757	-0.927025	8.3109	7.951	11.985	0.2	-0.19	0.446	5.61	10.5085
1384	15.091	14.195	0.109	-0.0936462	16.933	9.958	0.71	10.24	0.688	-0.596778	8.73	7.589	10.8686	-0.05	0.2	-0.0799	5.3	11.2864
1383	14.953	14.467	-5.979	-0.0818722	16.113	10.316	1.18	11.06	-0.543	-0.35991	7.8469	7.543	11.9639	-0.61	-0.04	0.2588	5.54	10.1737
1382	14.747	14.388	-0.288	-0.312846	16.249	9.932	-0.02	10.57	-1.064	-1.03578	8.0211	8.147	11.6257	0.15	0.65	-0.5181	5.56	9.53783
1381	14.18	13.947	-2.107	0.0637821	15.71	10.799	0.2	11.04	-0.161	-0.946954	8.427	7.789	11.7717	0.37	0.64	0.0982	5.63	8.62696
1380	14.184	14.034	-4.373	0.01747	15.751	10.372	0.27	11.05	-0.479	-1.23848	7.7478	7.404	12.1717	-1.1	-0.24	0.6157	5.46	11.0769
1379	14.455	14.871	-4.028	-0.338476	16.533	10.065	0.78	10.94	-0.776	-1.69058	7.8578	7.482	11.1612	0.3	-1.21	0.5834	5.07	11.2585
1378	14.715	14.448	0.81	-0.186676	15.767	9.748	0.47	10.36	-1.228	-1.50439	7.4937	7.114	11.9779	-1.32	-0.81	0.5222	4.85	10.9498
1377	14.467	15.079	-1.387	-0.384519	16.603	9.517	-0.48	9.97	-1.387	-2.04133	8.6936	6.478	12.6869	-0.27	-0.47	0.7826	5.22	10.4588
1376	14.936	15.552	0.619	-0.712045	15.796	9.264	-0.17	10.55	-1.019	-2.2167	7.5839	7.046	11.2463	-0.24	0.81	0.657	5.31	11.1119
1375	15.653	14.563	-0.133	-0.362344	15.813	9.9	-0.35	10.31	-0.98	-1.84887	7.5734	6.941	12.776	-0.44	-0.51	1.0474	5.38	10.5156
1374	15.35	14.232	-1.085	-0.145795	16.121	10.694	0.38	11.89	-0.99	-1.2288	8.2066	7.055	12.4361	-0.26	1.45	-0.0842	5.65	10.9982
1373	15.656	14.48	-0.533	-0.208402	16.035	10.544	-0.65	10.74	-0.394	-1.32959	7.3001	6.718	9.64248	-0.19	1.11	0.0445	4.82	10.195
1372	15.277	14.49	-6.154	-0.0113663	15.998	10.776	0.08	11.72	-0.359	-1.99122	8.7946	7.023	10.4058	-0.18	-0.75	0.5856	5.29	9.89939
1371	15.308	14.881	-1.94	-0.245143	16.233	10.187	0.63	11.03	-0.29	-1.82382	8.0458	6.859	12.9537	-0.37	0.12	0.7296	4.89	8.13118
1370	14.883	13.638	-0.611	0.225171	14.952	9.652	-0.31	9.99	-0.697	-1.47136	7.8924	7.657	11.785	-0.16	-0.19	-0.0164	5.25	9.54584
1369	14.722	14.439	1.044	-0.49753	15.149	9.954	0.12	10.34	-0.98	-2.29129	7.506	6.599	11.0778	1.27	-0.9	0.2117	5.77	10.266
1368	15.319	14.08	0.4	-0.167572	16.228	10.462	0.89	11.09	-0.493	-1.77656	8.0902	7.91	12.2491	-0.56	-0.31	0.2284	4.97	10.6182
1367	15.485	13.5	1.247	-0.241079	15.734	10.981	-0.09	10.18	0.023	-1.99805	7.3335	7.701	12.0736	-0.77	-0.63	-0.7807	5.67	9.78622
1366	15.448	13.381	-1.318	-0.223852	15.759	11.083	0.23	11.16	-0.801	-2.35108	7.2612	7.187	12.33	0.04	-0.04	-0.3929	5.36	10.2305
1365	15.217	14.936	0.496	-0.367711	16.731	10.239	0.26	11.01	0.564	-2.65741	8.1486	7.153	12.7333	0.72	-0.13	-0.0905	5.05	10.0118
1364	15.081	14.025	1.305	-0.540975	15.854	9.397	0.45	10.83	-0.002	-2.68019	7.4552	7.281	12.7963	-0.31	0.35	-0.3306	4.97	9.58589
1363	14.754	15.355	-0.69	0.0879784	16.294	9.429	-0.43	9.39	0.092	-2.47293	7.7256	6.633	13.0266	-0.33	0.45	-0.6843	5.23	10.5724
1362	14.78	14.729	1.417	0.0127049	16.134	9.687	0.18	11.03	-0.717	-3.21541	7.9095	6.688	14.3797	0.14	1.45	-0.6303	5.07	10.0889
1361	14.834	15.042	-1.896	0.129438	15.792	9.951	-0.1	10.52	0.137	-3.41755	7.5805	6.601	12.5032	0	-0.13	-0.553	5.12	10.0349
1360	15.401	14.319	-0.468	-0.266189	15.121	9.764	0.15	10.13	-0.816	-2.1609	7.3242	7.162	12.5139	-0.22	-0.5	-0.7705	4.92	10.5866
1359	15.539	14.931	-1.841	0.439071	16.204	9.823	0.2	10.53	-0.166	-1.9804	7.0095	7.067	13.0124	-0.75	0.17	-0.4844	5.03	11.1259
1358	15.506	15.042	0.27	-0.329193	15.969	9.829	-0.02	9.97	-0.707	-2.72631	7.7931	7.203	12.8359	-0.79	-1.33	-0.2498	5.44	9.99632
1357	15.66	15.267	0.012	0.00481919	16.294	9.652	-0.48	10.9	-0.811	-2.25542	6.715	6.864	12.4944	-1.48	-1.74	-0.2013	5.67	9.93128
1356	15.695	14.816	0.171	-0.0545545	16.504	10.295	0.08	11.6	-1.198	-2.69499	8.6358	7.431	13.474	-0.51	-0.36	0.4389	5.38	10.5795
1355	15.63	14.522	0.969	-0.219265	16.105	9.889	-0.21	10.63	-1.67	-2.46496	7.857	7.165	13.2031	-1	0.14	0.5006	5.19	10.727
1354	15.77	15.598	-3.978	-0.0232748	16.492	9.704	0.9	11.06	-0.583	-3.2399	7.6189	7.723	13.7248	0.79	1.01	0.7748	4.69	10.9911
1353	15.31	14.729	0.119	-0.0667095	15.796	9.434	0.47	10.24	-1.352	-3.18353	7.1961	7.438	13.0721	-0.22	-1.01	0.4843	5.19	10.8077
1352	14.642	14.241	-1.477	0.0747241	15.94	9.902	-0.28	11.23	-0.88	-2.59592	7.9903	7.498	12.0641	0.43	-0.29	-0.3363	5.54	10.544
1351	15.207	14.798	0.074	0.0151615	16.196	9.429	0.28	11.56	-1.387	-2.52133	7.0559	6.709	11.8022	-0.07	-0.8	-0.6784	5.8	10.9331
1350	15.084	14.812	-1.131	0.314489	15.586	9.137	-0.1	10.36	-1.541	-2.71435	6.6792	6.608	12.4353	-0.89	-0.99	-0.8114	5.15	10.9498
1349	15.037	15.009	-1.401	-0.0899505	14.828	8.91	-0.71	9.59	-1.694	-2.9683	6.9264	7.368	12.2497	-0.54	-1.13	-1.3386	5.34	10.9007
1348	15.039	15.879	-0.756	-0.00106868	15.928	8.594	-1.37	9.12	-2.464	-2.87435	7.0998	6.383	11.8694	-0.41	-0.76	-1.3427	5.02	9.98827
1347	14.859	15.516	-6.495	0.250118	16.933	9.654	-0.1	10.28	-1.982	-2.2241	6.921	6.791	13.1326	-0.3	-0.13	-1.1523	5.09	10.6951
1346	15.254	15.506	-1.495	0.271971	15.8	9.082	-0.96	9.14	-1.888	-2.35905	7.5485	7.187	12.6881	0.15	0.18	-0.6864	4.74	9.51381
1345	15.523	15.419	-0.571	0.10082	16.801	9.441	0.06	9.54	-1.392	-2.14097	6.7545	6.85	12.888	-2.39	0.7	0.1193	4.93	11.1957
1344	15.305	15.29	0.429	-0.636377	16.142	9.4	-0.33	9.48	-1.496	-2.33001	7.0454	6.469	12.8846	-0.07	0.99	0.1873	5.23	10.0118
1343	15.009	15.442	-1.885	-0.297873	16.224	10.069	0	10.38	-1.01	-1.93542	6.4246	6.902	12.3623	-1	0.94	0.1447	5.33	10.4004
1342	15.378	15.874	-6.547	-0.321357	15.656	9.903	0.12	10.07	-1.268	-1.8409	6.141	7.459	12.2977	-3.18	-0.43	0.036	5.33	10.9331
1341	15.359	14.66	-0.144	-0.189519	15.71	10.466	-0.53	10.56	-0.786	-1.56702	6.7728	7.135	11.6323	-0.46	-0.87	-0.7076	5.46	10.7997
1340	15.721	15.631	-0.625	0.0920885	15.516	10.161	-0.19	10.64	-0.662	-1.99862	7.5068	6.994	12.3067	0.1	-0.52	-0.6634	4.77	10.4233
1339	15.553	15.175	-1.153	0.151425	15.866	10.834	-0.82	10.89	-1.014	-2.48033	6.9377	7.466	12.6907	-1.51	0.6	-0.7964	5.6	10.6576
1338	15.462	14.687	-1.89	0.199725	14.511	9.791	0.38	9.71	-1.729	-2.21613	7.3274	7.689	12.8311	0.2	-2.22	0.2313	5.17	10.3157
1337	15.733	14.623	-1.249	-0.133383	14.832	10.356	-0.23	10.48	-0.776	-2.74282	6.7062	7.972	13.0254	-0.03	1.04	-0.6299	4.97	10.6103
1336	15.868	15.663	-2.655	-0.0441118	13.333	10.214	-0.04	10.62	-1.144	-2.57143	7.0121	7.799	14.0849	-0.63	0.26	-0.459	5.27	9.52982
1335	15.581	14.789	-0.41	-0.246268	15.269	10.07	-0.33	10.43	-0.399	-2.70296	6.3877	7.377	12.968	-2.24	0.04	-0.5349	5.37	11.0125
1334	15.123	14.752	-3.067	0.185615	15.644	9.866	0.61	11.41	0.172	-2.39378	7.3793	7.628	12.8466	0.42	0.18	-0.745	5.54	9.64996
1333	15.158	14.352	-2.826	0.136019	15.549	9.151	-0.24	9.37	-0.245	-2.9962	7.7116	7.352	11.5778	-1.05	-1.18	-0.5598	5.43	10.3464
1332	15.21	13.845	-2.621	-0.0544254	17.011	9.222	-0.41	10.18	-0.201	-2.96147	6.6349	7.892	10.7803	-0.17	-1.04	-0.6652	5.84	10.6103
1331	15.791	15.092	-1.963	-0.0461749	16.097	9.981	0.9	11.01	-2.483	-2.00602	7.8414	7.837	11.5139	-0.04	-0.16	-0.2039	5.69	9.94756
1330	15.366	14.71	-4.325	-0.0587245	15.705	9.266	-0.15	9.56	-1.049	-1.97528	5.2801	7.561	10.7665	-2.02	-0.21	-1.0697	5.44	9.48978
1329	15.158	15.134	-1.738	-0.470698	16.904	9.502	-0.34	10.23	-0.136	-2.46439	8.6596	7.286	12.151	0.19	1.13	-0.7119	5.26	10.004
1328	15.056	14.522	-2.79	0.230605	16.97	9.435	0.12	9	0.683	-2.67677	8.8579	7.605	13.324	-0.61	-1.9	-0.6769	5.51	10.8641
1327	15.217	14.209	1.325	0.374062	15.92	9.834	-0.74	10.72	-0.052	-1.7088	9.0634	7.187	12.208	-0.35	-0.81	-0.4095	5.3	10.6418
1326	15.023	14.462	-0.135	-0.0575279	16.224	9.575	0.18	10.18	-0.429	-2.35051	7.9675	7.368	11.1791	-0.76	-0.37	-0.2271	5.23	10.6418
1325	14.708	13.675	1.15	0.34478	16.191	9.809	-0.59	10.28	-0.136	-2.04702	8.007	7.374	11.865	-1.63	-1.38	-1.1493	5.7	10.8077
1324	14.932	13.873	-1.322	0.17448	15.878	9.69	-0.01	10.31	-0.469	-2.22296	8.072	7.146	12.3554	-0.62	-0.36	-0.6937	5.73	10.2021
1323	14.439	14.812	-4.125	0.00123967	15.911	10.086	-0.51	10.21	-0.057	-2.22638	8.4381	7.593	11.2711	-0.68	0.44	-1.1915	5.89	10.8481
1322	13.909	14.651	-0.382	0.274194	15.059	10.107	-0.21	9.93	-0.414	-1.93542	8.4329	7.954	14.4365	-1.1	0.7	-0.7203	6.06	9.90693
1321	14.049	14.871	-0.407	0.223219	15.508	10.551	0.63	9.96	0.052	-1.94738	6.8724	7.862	12.3599	-2.28	-0.71	0.0521	5.64	10.9747
1320	14.196	14.959	-1.729	0.356704	15.24	9.372	0.24	10.16	-0.364	-2.43193	8.4948	8.113	13.5764	-0.13	-0.15	-0.0092	5.82	10.6497
1319	14.383	14.549	-0.859	-0.315799	14.33	10.144	-0.45	10.5	-0.861	-2.05841	8.4142	7.892	12.3565	-0.6	-0.27	-0.5985	5.71	9.93128
1318	14.962	14.117	-1.836	0.2319	15.491	10.099	0.47	11.24	-0.384	-2.79179	8.0316	8.421	13.5515	-2.29	-0.65	0.1037	5.12	10.2731
1317	15.354	14.54	-0.762	-0.666766	16.282	9.549	-0.58	10.49	-0.449	-1.46966	8.8235	8.033	13.1101	-0.47	0.82	-0.6607	5.68	9.86921
1316	15.579	14.379	-0.859	-0.0634197	15.462	10.226	0.2	11.49	-1.223	-0.530159	10.098	7.447	12.7585	-0.87	-0.06	0.5142	5.32	9.56186
1315	15.231	15.097	-1.057	-0.341206	15.364	10.02	-0.5	11.59	-1.347	-1.42297	9.3587	7.121	14.3137	-0.12	0.01	0.6143	5.52	10.9747
1314	15.147	14.503	0.556	0.0262958	15.557	8.976	-1.23	9.42	-0.186	-1.25784	9.0231	7.137	13.0651	-0.69	-0.03	0.5391	5.47	11.2585
1313	15.305	15.125	1.199	0.0292142	16.093	8.796	-0.97	9.51	0.003	-1.41499	9.2098	7.292	13.3025	-0.67	0.53	0.3017	5.33	11.0412
1312	15.667	14.333	-3.972	0.347747	16.801	9.671	-0.31	10.12	-0.201	-1.40588	8.1882	6.793	12.5609	-0.36	0.69	1.2585	5.6	10.7835
1311	15.917	13.418	2.277	0.196135	16.447	10.458	0.08	10.79	-0.384	-1.21172	9.2254	7.121	13.052	-1.55	-0.65	0.6413	5.5	11.091
1310	15.693	13.459	1.789	0.110783	16.789	10.28	-0.61	11.12	-1.684	-0.907097	8.7662	7.386	12.9714	-0.13	-0.73	1.5458	5.17	10.7674
1309	15.985	14.08	1.398	0.0232576	16.784	10.827	-0.64	10.4	-0.523	-1.08589	8.7838	7.564	10.7575	0.65	-0.94	0.8171	5.3	10.8239
1308	15.667	14.789	-0.124	-0.166549	16.776	11.378	0.07	11.38	-0.9	-2.7952	8.5519	6.884	13.7913	0.36	0.12	0.9667	5.45	10.9164
1307	16.09	13.836	1.444	0.246227	16.241	11.247	0.32	11.18	-1.898	-2.42908	8.0822	8.116	12.9056	-0.2	0.38	1.6476	5.03	10.0272
1306	15.684	13.933	-1.253	-0.164283	15.817	12.058	0.7	11.74	-1.089	-2.08175	8.4453	7.244	12.577	-0.19	0.8	0.781	5.6	10.8934
1305	15.432	13.496	-0.016	-0.320608	15.417	10.942	0.18	10.92	-1.278	-1.56759	7.3971	7.219	13.2815	-0.24	-0.48	0.9249	5.02	11.2515
1304	15.651	14.756	-1.139	-0.185592	15.907	10.452	0.24	10.66	-1.56	-2.18709	8.0023	6.736	12.5262	-0.99	-0.45	1.1344	5.37	10.6261
1303	14.752	14.72	-0.704	0.12703	15.825	10.429	-0.07	10.19	-1.853	-0.765887	8.082	6.451	11.2191	-1.17	1.79	1.1041	5.89	10.2802
1302	14.483	14.333	-3.561	-0.20381	16.13	10.552	0.28	10.37	-1.228	-1.34382	7.5909	6.18	11.5719	-0.35	-0.1	-0.0339	5.1	10.1352
1301	14.822	14.821	-1.949	0.189448	16.764	10.667	-0.2	10.06	-1.292	-1.30339	8.0157	6.902	12.2205	-0.26	-0.35	0.8909	5.19	9.52982
1300	14.593	14.77	-5.307	-0.15321	16.068	10.478	0.54	10.05	-1.377	-2.54752	7.5198	6.832	11.8411	-1.45	0.18	0.4935	5.02	9.83149
1299	14.82	13.919	-2.851	-0.306495	15.504	10.263	-0.34	9.89	-0.97	-1.71905	7.6378	6.959	11.2417	0.57	-0.03	0.3744	5.19	9.67306
1298	15.086	15.695	-2.167	-0.564934	16.076	10.56	-0.08	10.8	-0.588	-1.10069	7.5702	7.381	11.6157	-1.43	-1.95	0.3113	4.88	9.55385
1297	14.649	14.761	-1.943	-0.169743	15.845	9.496	-0.74	10.02	-0.002	-0.63151	7.7247	7.372	11.5007	-0.49	-0.98	-0.3838	5.33	9.37894
1296	15.133	15.088	0.309	-0.487262	15.928	10.042	-0.68	9.56	-0.652	-1.43435	7.441	7.942	12.1548	-0.49	-0.01	-0.887	5.22	10.8158
1295	14.679	14.398	-2.101	-0.449135	16.694	10.014	0.04	11.11	-0.617	-1.21058	8.3648	7.564	11.7457	0.12	-0.04	-0.5716	4.79	10.9164
1294	14.892	13.763	-3.507	-0.537851	15.491	9.984	-0.55	9.85	-1.665	-1.79478	7.5612	7.607	11.3863	-0.7	0.4	-0.8642	5.09	9.89184
1293	14.574	14.876	-3.451	-0.622067	15.751	9.74	-0.06	10.4	-1.759	-1.91037	7.4885	7.199	10.219	-0.48	0.19	-0.3492	4.96	8.86782
1292	14.621	14.421	0.695	-0.210812	16.023	10.066	-0.76	10.11	-0.975	-1.34895	7.8989	7.306	11.2202	-1.12	-0.61	-0.163	4.7	9.29862
1291	14.56	15.447	-1.915	-0.251439	14.865	9.934	-0.59	10.08	-1.759	-1.30795	7.4199	7.368	11.6261	-1.66	0.45	0.3817	5.27	10.0966
1290	14.691	15.861	-2.935	-0.525065	16.587	10.133	-0.74	10.33	-1.555	-1.04432	7.0702	7.222	11.3589	-1.94	-0.2	0.2388	4.71	10.5085
1289	14.759	15.019	-1.75	-0.299562	15.747	10.351	-0.74	11.01	-0.851	-2.00659	7.3624	6.925	11.8638	-1.15	0.67	0.3163	4.66	9.6806
1288	14.507	15.207	1.528	-0.290166	16.109	10.368	0.16	10.46	-1.541	-0.897986	7.1086	6.839	12.3222	-1.54	1.22	0.862	5.09	9.05767
1287	14.901	15.424	0.063	-0.331954	15.858	10.166	0.26	11.08	-2.245	-0.871225	7.3055	7.14	13.9617	-2.05	0.04	0.945	4.98	8.98465
1286	15.035	15.709	-3.326	-0.565182	15.998	10.713	-0.01	11.19	-0.831	-0.979979	8.0611	7.192	13.032	-1.19	-1.08	-0.209	4.85	9.24751
1285	14.831	13.832	-1.739	-0.780156	16.509	10.221	0.4	11.35	-0.856	-1.70254	7.9822	7.673	13.3979	-0.96	-0.03	1.7661	4.75	9.93128
1284	14.661	14.333	0.124	-0.464162	15.92	9.716	0.22	10.57	-1.317	-2.23093	7.7195	7.199	12.2322	-0.52	0.95	2.0586	5.22	10.2021
1283	14.493	14.287	-0.138	-0.219443	15.45	10.403	-0.43	11.34	-2.22	-0.934427	7.88	7.327	11.3101	-0.19	-0.85	1.1014	5.06	9.76359
1282	14.353	15.106	-0.976	-0.0998944	15.907	9.564	-0.75	9.97	-1.536	-1.40702	8.0111	7.47	12.4603	-1.43	-3.37	1.4377	4.97	9.482
1281	14.722	13.689	-0.499	-0.791128	16.492	9.384	-1.04	10.26	-1.228	-0.931011	7.5626	7.527	13.0969	-0.64	-0.61	1.1439	5	10.3387
1280	15.191	14.733	-1.231	-0.337686	16.018	9.611	-0.95	10.54	-1.044	-1.28574	7.8766	6.658	11.9183	-1.12	0.17	0.9972	4.86	9.6806
1279	14.574	14.595	-0.483	-0.30662	16.241	9.625	-1.09	10.57	-0.826	-1.24247	8.7144	6.668	12.8718	-0.33	0.96	0.5054	4.76	9.01386
1278	14.32	15.088	-4.85	-0.461518	16.163	10.233	-0.65	10.5	-2.201	-0.785816	7.5455	6.795	12.7394	-1.62	0.6	-0.359	4.84	9.30592
1277	14.677	14.692	-1.064	-0.174361	15.821	9.886	-1.41	10.09	-1.183	-0.478913	8.2889	7.502	11.4687	0.07	-0.37	-0.8042	4.85	9.55385
1276	15.569	14.692	0.287	-0.337648	15.883	10.328	-0.76	10.61	-1.188	-1.24759	8.4669	7.785	13.0315	-0.9	0.02	0.0424	4.87	9.76359
1275	15.446	15.603	0.403	-0.0765989	15.059	10.665	-0.81	11.38	-0.627	-0.661119	7.7909	7.723	11.4461	-1.48	-0.49	-0.024	5.18	9.10878
1274	15.361	15.534	-0.085	-0.0223312	15.417	10.044	-1.25	10.61	0.385	0.113255	9.2012	7.272	11.3446	0.69	-0.66	-0.4261	5.47	8.30745
1273	15.13	14.931	0.297	-0.412469	15.413	10.236	-0.82	11.47	0.003	-1.02496	8.6794	8.284	12.9799	-1.13	0.71	-0.4922	5.16	9.38624
1272	14.894	14.798	-0.252	-0.248463	14.997	10.427	-0.53	11.48	-0.091	-1.03122	8.3673	7.229	14.1118	-1.45	-0.03	-0.6351	5.09	8.5253
1271	15.27	14.729	-0.907	-0.62253	16.307	9.996	0.02	11.32	-0.191	-1.1935	9.9561	7.429	12.9209	0.42	0.92	0.3145	4.89	9.35704
1270	14.911	14.485	-3.496	-0.119341	16.822	10.219	-0.37	11.27	-0.156	-2.38353	8.9367	7.441	13.3871	-1.36	0.3	0.4049	4.88	9.44466
1269	15.121	15.037	1.651	-0.110973	16.249	9.883	-0.2	11.95	-0.325	-2.34595	8.5213	7.97	12.2456	-0.98	-0.08	0.7591	5.42	10.1044
1268	14.897	14.72	1.811	-0.362786	16.579	9.862	-1.5	10.89	-0.776	-2.31464	9.4301	7.238	12.3609	-0.86	-1.48	-0.053	5.37	9.9557
1267	15.004	15.032	-0.169	-0.1286	16.315	9.608	-0.72	10.89	-1.039	-2.80147	9.5362	6.759	12.0753	-0.34	-0.01	-0.7746	5.17	10.266
1266	15.154	14.844	0.483	-0.048849	15.915	9.782	-0.92	11.31	-0.459	-2.22581	8.9202	7.598	13.8612	-0.03	0.96	-0.4122	4.7	9.83149
1265	15.14	14.977	-0.284	-0.468716	16.517	9.895	-0.31	10.83	-0.751	-3.32759	8.7883	7.548	12.6859	-0.44	0.12	-0.4401	4.76	10.7835
1264	15.383	14.651	0.106	-0.0127242	15.722	9.621	-1.06	10.38	-1	-1.37514	8.4901	7.397	11.1352	-0.96	-0.86	-1.4663	5.23	10.6807
1263	15.289	14.204	-1.713	0.119777	15.594	8.917	-0.08	9.78	0.018	-2.44275	8.5455	6.855	12.9958	-0.95	-2.1	-0.3613	4.78	10.9414
1262	15.282	14.052	0.844	-0.146463	14.779	9.314	-0.44	9.95	0.092	-3.25527	8.3189	6.232	12.5796	-0.76	0.14	-0.9316	4.89	10.1661
1261	15.116	14.375	-0.002	-0.0555364	14.004	9.625	-0.24	10.08	-0.915	-1.74695	8.7399	6.67	12.0671	-0.95	-0.68	-1.7206	5.15	9.26941
1260	15.081	15.138	-1.112	-0.342738	13.963	9.496	-0.02	9.96	0.112	-2.76218	8.7398	7.575	11.8906	-0.9	-0.88	-0.4709	5.1	10.3927
1259	15.009	15.332	-4.249	-0.301521	14.198	9.488	-0.3	9.69	-0.3	-3.25983	8.9166	7.787	11.365	-0.68	0.34	-0.4769	5.77	10.2376
1258	14.985	14.651	0.404	-0.49788	15.454	10.387	-0.55	10.57	-0.831	-2.36133	7.6093	8.022	14.1033	-2.64	-1	-1.0387	5.04	9.32053
1257	14.729	14.485	1.258	-0.232872	16.381	11.013	0.68	12.1	0.077	-1.83691	8.9444	8.389	12.3039	-1.25	0.09	-0.9042	6.05	9.80886
1256	14.787	14.761	0.022	-0.237548	16.55	10.357	0.22	10.51	-0.836	-2.58851	7.7927	7.167	13.4329	-1.23	0.55	-1.5025	5.73	10.3772
1255	15.326	14.89	0.636	-0.252541	16.747	10.602	0.15	10.83	0.107	-2.21898	8.2769	7.917	14.0388	-0.48	0.67	-1.3041	5.92	10.5511
1254	15.941	15.355	-1.174	-0.0975809	16.76	10.517	-0.18	10.63	-1.273	-2.47919	7.8473	7.242	13.0109	-1.4	-1.33	-0.8828	5.51	10.2518
1253	15.658	15.447	-0.162	0.0436425	16.529	11.092	0.62	11.53	-0.449	-1.72019	8.3276	6.836	15.3558	-0.85	0.11	-0.907	6.1	10.6261
1252	15.499	15.92	-0.96	-0.132747	17.291	9.56	-0.31	10.32	-0.667	-2.933	8.3903	6.487	14.7693	-0.43	-0.08	-0.8547	6.08	10.4233
1251	15.175	15.102	1.284	-0.0319824	16.101	10.233	0.36	10.69	-0.816	-2.69043	8.396	6.316	14.1046	-1.12	0.8	-0.3496	6.21	10.3618
1250	14.971	14.582	1.875	-0.0818541	16.418	10.713	0.57	11.34	-0.707	-2.19506	8.4018	6.845	14.4051	-1.61	-0.23	-0.8343	5.46	10.735
1249	15.217	15.35	1.967	0.163817	17.13	9.967	0.25	10.79	-0.414	-2.05215	7.488	6.941	13.5046	-1.58	-0.82	-1.1486	5.39	10.1584
1248	15.745	16.749	0.088	-0.115077	16.228	9.888	-0.01	10.38	-0.364	-4.16061	8.0513	7.587	12.7308	-1.26	-0.64	-0.9066	5.53	10.832
1247	15.439	15.64	-0.29	0.152787	16.34	9.256	-0.11	9.79	0.112	-0.646315	7.7032	7.299	14.9405	-0.6	-0.7	-0.6245	5.89	9.93128
1246	15.364	15.525	-1.142	0.0247477	16.369	9.776	-0.39	10.08	0.211	-0.701546	8.0039	7.042	13.8446	-0.09	-1.39	-0.4063	5.52	10.6497
1245	15.357	16.56	-0.414	0.080591	15.281	9.563	-0.11	10.42	-0.216	-1.28347	7.2833	7.028	14.2038	-0.4	-0.53	-0.5893	6.39	9.24021
1244	15.074	16.123	-1.278	-0.21834	16.018	9.808	0.12	9.42	-0.211	-1.97755	7.3921	7.315	13.9844	-0.98	-1.23	-1.0716		8.85322
1243	14.862	15.258	-0.279	-0.0231333	15.948	9.176	-0.13	9.71	0.132	-1.32389	7.7671	7.149	15.4722	-0.71	1.27	-0.6047		9.33513
1242	15.018	15.552	0.352	-0.413717	15.137	9.354	-0.1	9.91	-0.528	-1.16959	7.8632	6.975	14.0325	-0.23	-0.21	-0.0978		9.482
1241	15.861	15.152	0.883	0.433043	16.331	9.36	0.09	9.69	0.335	-3.19378	8.1542	6.465	13.5338	-0.34	-0.17	-0.3828		9.34243
1240	15.331	15.58	1.035	0.135193	15.899	9.17	0.04	9.55	0.201	-1.97812	8.0384	6.959	12.3114	-0.78	0.28	-0.6647		9.48978
1239	15.093	14.563	-1.104	0.235009	15.487	9.676	-0.62	10.11	0.693	-1.14567	7.6723	7.607	12.1908	-1.51	-0.11	-0.7667		9.71078
1238	15.21	14.085	-1.428	0.0784673	14.589	9.289	-0.8	8.93	0.628	-0.91336	7.7462	7.213	11.799	-1.57	0.67	-1.6025		9.92314
1237	15.151	15.87	0.52	-0.0307708	16.525	10.062	-0.98	11.1	-0.831	-0.985673	7.7072	7.149	13.5033	-0.82	1.05	-0.2479		10.3695
1236	14.925	15.663	-2.504	-0.256236	15.351	9.793	0.02	10.09	-1.292	-0.794357	7.5645	6.481	13.3632	-1.59	-1.34	-1.073		10.0889
1235	14.404	15.175	-1.076	-0.0864791	14.997	10.054	0.18	10.14	-0.866	-1.34951	7.8253	6.567	12.1112	-1.34	-0.13	-0.6973		9.82394
1234	14.799	15.046	-1.896	-0.0359841	16.43	9.478	-0.23	10.55	-1.153	-0.757916	7.2529	6.022	13.118	-1.38	-0.76	-0.5613		10.7835
1233	15.305	15.341	-1.803	-0.221002	15.994	9.497	-0.22	10.31	-0.88	-0.985103	7.1915	6.592	11.5081	-1.25	-0.84	-1.3394		10.5085
1232	15.172	14.963	0.019	-0.197663	16.113	9.124	-0.69	8.96	-0.498	-0.817702	6.9629	6.857	12.0115	-0.6	-1.16	-2.6979		10.3772
1231	15.044	15.396	0.165	-0.285198	16.756	9.322	-0.16	9.65	-0.568	-1.35122	7.3696	7.338	11.7112	-0.96	-0.76	-1.5822		10.2447
1230	15.14	14.402	0.101	0.108459	15.219	9.789	-0.64	8.86	0.365	-1.5972	5.9954	7.078	11.7138	-1.48	-1.35	-1.0986		7.16035
1229	14.85	14.48	3.059	-0.334073	15.705	9.148	-0.47	9.69	0.281	-2.10908	6.465	7.256	13.4227	-0.63	-1.13	-1.259		9.45196
1228	15.212	15.93	0.17	0.00602061	16.434	10.223	0.04	9.46	-0.111	-2.69955	7.1006	6.941	14.7361	-0.51	1.13	-1.8905		8.97735
1227	14.593	15.405	-0.58	-0.120808	16.459	10.59	0.94	12.15	-0.543	-1.83407	7.1271	6.688	14.2243	-0.66	0.71	-2.3892		9.08687
1226	15.02	14.591	-0.062	-0.348809	16.101	9.933	-0.3	9.78	0.266	-1.95022	7.5455	7.536	12.7286	-0.28	0.14	-1.1561		10.3618
1225	14.983	15.585	0.977	-0.457251	16.109	10.945	-0.36	10.9	0.052	-1.94965	7.4047	6.982	13.361	-0.88	0.17	-1.3528		9.83149
1224	14.736	15.566	0.93	-0.305569	15.075	10.607	0.32	11.15	-0.523	-1.813	8.0801	7.229	13.4497	0.38	1.61	-0.6697		10.544
1223	14.978	16.045	0.802	-0.0204374	14.943	10.196	-0.33	10.85	-0.682	-2.09599	6.1768	7.219	13.5838	-1.87	1.11	-1.2715		10.2305
1222	15.217	15.47	-1.347	-0.0557527	15.607	9.92	0.05	10.57	0.246	-2.47976	6.6789	7.199	12.4921	-1.15	1.24	-0.3003		10.4517
1221	15.086	15.833	-2.948	-0.232317	15.829	10.57	0.4	11.98	-0.007	-1.73955	6.8314	7.596	11.043	-0.74	2.76	-0.6441		10.6103
1220	14.899	15.157	-2.341	-0.479074	15.64	9.973	0.11	10.57	-0.201	-2.02538	7.1604	7.789	12.4453	-0.75	1.35	-1.0602		10.3927
1219	14.983	15.511	-0.813	-0.049049	15.714	10.068	0.25	10.88	-0.22	-1.63023	7.3455	7.281	12.3817	-0.75	-0.83	-1.1413		10.0503
1218	15.179	14.108	-1.901	-0.305814	16.406	10.454	0.18	11.29	-1.049	-1.79535	7.2667	7.144	14.0901	-0.48	-2.74	-0.2431		11.2166
1217	14.757	15.037	-1.245	-0.258648	15.495	10.52	0.67	11.86	-0.836	-2.4678	7.245	6.871	14.1771	-1.33	-1.32	-0.0735		10.8481
1216	14.514	14.908	-0.603	-0.107846	14.803	10.081	0.56	10.85	-0.657	-1.27435	6.6995	7.153	12.5737	-1.15	-0.74	-0.868		10.9911
1215	14.476	15.428	-0.959	-0.5722	14.993	9.171	0.21	10.1	-0.439	-1.72019	7.4416	6.688	11.7452	-0.55	0.73	-1.8996		11.2027
1214	14.191	15.566	-1.629	-0.222416	15.656	9.801	0.54	11.01	0.236	-2.00602	7.1505	6.72	14.9911	-0.92	-0.24	-0.7684		11.4764
1213	14.437	14.835	-3.721	-0.290021	15.874	9.536	1.05	10.72	-0.146	-2.32204	8.2274	6.823	12.6423	0.01	0.11	-0.5847		10.9664
1212	14.724	15.175	0.087	-0.116389	15.668	10.257	0.51	10.98	0.072	-2.19222	6.6866	5.956	12.5077	-1.06	0.22	-0.39		11.6222
1211	14.918	14.996	0.1	-0.108336	16.023	9.708	0.68	10.33	-0.126	-1.35863	8.6116	6.77	13.0745	0.04	-1	-0.4472		10.7997
1210	15.039	14.715	-1.658	-0.0972105	15.479	8.744	0.23	9.92	0.052	-0.749944	7.3747	6.98	12.8292	-0.2	-1.07	-1.1082		10.9248
1209	15.1	15.235	-1.015	-0.0680804	14.972	9.293	0.23	10.66	-0.747	-2.02197	6.9494	7.042	13.8108	-0.46	-1.62	-0.6074		10.2021
1208	15.114	14.522	-1.089	0.061264	14.585	9.069	-0.28	9.82	-0.598	-1.14226	8.0359	7.6	12.9963	-0.65	-0.63	-0.6534		11.2655
1207	15.91	14.885	-3.923	-0.716146	16.196	8.977	-0.04	9.8	-0.91	-1.57158	6.9382	7.153	14.2591	-0.98	-1.6	-0.9577		10.4081
1206	15.623	14.724	-2.639	-0.593033	15.817	9.523	0.61	10.17	0.464	-1.1787	7.7353	6.925	15.1595	-0.89	0.29	-0.5925		10.8158
1205	15.086	14.066	-1.457	0.320328	14.614	9.607	0.44	10.33	0.504	-2.20133	8.173	6.784	13.4844	-0.72	0.39	-0.4158		10.5156
1204	14.754	13.671	0.356	-0.165216	14.841	9.874	0.68	11.02	-0.935	-1.30966	7.6594	6.845	12.6909	-0.71	-0.06	-0.2385		9.84658
1203	15.747	15.299	1.719	-0.166861	15.273	9.586	0.31	10.18	-0.196	-1.60062	7.3624	6.362	13.4178	-0.55	-0.42	-0.5934		9.9557
1202	14.967	14.899	0.277	0.0740312	15.063	9.286	-0.06	9.41	-0.766	-1.49243	7.858	7.201	13.7497	-0.21	-0.83	-1.9436		9.78622
1201	14.708	14.729	-0.469	-0.160984	15.635	9.359	0.26	9.71	-0.687	-1.34154	7.0662	7.349	14.1817	-1.93	-0.31	-0.7601		9.45926
1200	15.098	14.02	0.139	-0.460392	14.223	9.308	0.26	10.28	-0.98	-0.632649	5.91	7.308	14.0164	-1.19	-0.87	-0.6862		10.1584
1199	15.289	14.453	1.319	-0.126872	15.413	9.621	0.25	11.11	-1.049	-0.513077	7.9163	7.028	12.1778	-1.1	0.67			10.3927
1198	14.834	15.088	-1.398	-0.244861	16.138	8.797	0.7	10.28	-0.871	-1.42923	7.7827	6.77	14.1596	-0.79	-1.58			9.77868
1197	14.757	14.563	-0.158	-0.462197	14.709	9.738	0.03	9.58	-1.357	-1.49927	7.6107	7.331	13.0661	-0.88	1.45			9.75605
1196	15.035	15.746	-0.826	-0.112342	14.857	9.835	0.1	10.3	-0.895	-0.863253	7.8621	6.768	14.4354	-0.59	0.31			10.0118
1195	15.385	14.715	-0.206	-0.0563341	15.701	9.775	0.47	10.27	-0.027	-1.56076	7.2581	6.991	13.2916	-0.7	-0.39			10.4004
1194	15.728	14.43	0.482	-0.282759	15.014	9.826	0.01	9.06	-0.533	-2.58225	7.6726	7.452	13.1804	-0.17	-0.74			9.64996
1193	15.31	15.382	-0.306	-0.0433162	15.759	10.072	-0.15	10.98	-0.89	-1.79307	7.8062	6.957	12.7902	-0.68	-0.02			9.43005
1192	14.74	14.913	0.496	-0.0472413	15.689	10.272	-0.2	9.86	-0.742	-2.00546	7.3084	7.055	13.8766	-0.79	1.29			9.29132
1191	14.857	14.503	0.364	-0.375863	14.923	9.905	0.12	10.26	-1.173	-1.58183	8.3416	6.227	14.895	-0.31	-1.55			11.5928
1190	15.467	15.12	-0.078	0.0435189	14.486	9.664	0.07	10.01	-0.905	-1.29258	8.1217	6.193	14.3341	0	-0.46			10.3618
1189	15.06	14.996	1.306	-0.0381678	15.207	9.56	-0.07	9.62	-0.434	-1.15023	7.2536	6.538	14.6422	0	-1.25			6.77556
1188	15.801	15.575	2.432	0.0956392	15.602	10.215	0.08	10.98	-0.722	-2.10624	7.1997	6.978	13.1944	-1.69	-1.36			10.7835
1187	15.28	14.591	0.135	0.17762	15.376	9.7	0.04	10.81	-0.727	-1.26638	7.7554	7.213	14.1439	-0.14	-0.94			10.6103
1186	14.836	15.267	0.212	0.209225	15.071	9.611	-0.19	10.41	0.395	-1.12517	9.0565	7.003	16.5788	-0.3	0.65			11.2795
1185	14.201	14.338	0.363	0.158537	15.944	9.888	-0.16	11.36	0.033	-0.846172	7.9521	7.242	12.9083	-0.34	1.08			10.634
1184	14.425	14.623	-0.047	0.356724	14.902	10.195	0.26	11.26	-0.414	-1.86083	8.656	6.718	13.6195	-0.77	0.35			10.4304
1183	14.616	14.931	-1.983	-0.0251545	15.87	10.163	-0.03	10.76	-0.568	-1.77713	8.4034	6.889	12.5401	-0.17	-0.83			10.9248
1182	14.654	14.72	-0.944	-0.13714	15.837	9.394	-0.29	9.87	-0.34	-1.55791	8.1746	6.515	12.9525	-1.11	0.6			10.2802
1181	15.198	14.048	0.413	-0.133954	15.269	10.052	-0.5	10.93	-0.483	-2.1478	8.0427	7.509	11.4505	-0.23	0.29			9.96384
1180	16.093	14.885	-4.615	-0.0836713	14.915	10.429	-0.02	11.63	-0.603	-3.0167	8.18	6.745	15.2918	-0.22	0			11.034
1179	15.66	14.526	-0.796	0.0716381	15.306	9.848	-0.1	10.51	-0.622	-1.4725	8.2323	7.47	12.6884	-1.09	0.22			10.1429
1178	15.249	14.163	-3.058	-0.0597735	14.902	10.282	0.2	11.02	-0.707	-1.55905	8.5168	7.317	12.6794	0.58	-0.38			9.38624
1177	15.56	15.355	-1.497	0.00617444	14.511	9.956	0.25	10.5	-0.012	-1.47535	7.7657	6.813	14.2338	-0.88	0.03
1176	15.186	14.747	-0.502	-0.229416	15.318	10.53	-0.66	11.01	0.082	-1.24759	8.1329	6.367	13.4425	-0.61	-0.27
1175	15.287	15.672	1.018	0.186488	15.524	11.248	-0.04	11.84	-0.98	-1.0671	8.6167	6.544	14.8722	0.18	-1.05
1174	15.319	15.111	-0.898	0.0217929	16.055	10.321	-0.35	11.54	-1.59	-0.817133	8.2322	6.558	14.0771	-0.17	-0.92
1173	15.256	15.373	-0.368	-0.031404	15.738	11.198	-0.38	11.62	-0.24	-1.57044	8.4192	6.159	13.216	0.18	-0.36
1172	15.228	15.069	-4.139	-0.253586	15.948	10.584	-0.22	11.76	-0.861	-1.9041	7.7823	6.622	14.9567	-0.97	0.34
1171	15.46	15.529	-1.684	-0.337904	15.854	10.513	-0.42	11.02	-0.841	-1.76973	9.0762	7.267	13.2817	0.49	-0.57
1170	14.957	15.437	-5.854	-0.382391	16.076	10.627	0.02	11.94	0.861	-1.79364	8.3825	6.761	16.0316	-0.17	0.05
1169	15.177	14.812	0.699	0.218124	16.611	10.827	-0.2	11.31	-0.032	-1.08019	8.4471	6.378	15.8596	-0.29	0.81
1168	15.093	14.71	0.897	-0.23049	16.266	10.827	0.45	12.41	-0.086	-1.35065	8.7403	7.181	16.5436	-0.56	-1.35
1167	15.198	15.157	-1.302	0.0274445	14.783	10.311	-0.13	11.78	0.062	-1.6103	7.8759	7.767	14.899	0.26	1.44
1166	15.422	14.715	-2.47	-0.0884364	15.804	10.467	0.03	11.7	-0.26	-0.565461	7.7307	7.425	14.686	-0.09	0.48
1165	15.962	14.835	-1.837	-0.162476	16.644	10.981	-0.11	11.59	0.226	-1.57442	8.1374	7.276	14.8702	-0.08	0.82
1164	15.614	15.134	-0.226	-0.0484173	16.175	10.762	0.52	11.79	0.072	-2.45129	8.0323	7.185	13.4931	-0.42	-1.03
1163	15.434	15.019	-0.225	-0.0528847	16.48	10.521	-0.3	11.72	0.514	-1.67521	7.6585	7.516	15.7445	-0.35	0.4
1162	15.625	15.24	-1.604	-0.603368	16.55	10.361	0.43	12.03	0.817	-1.23165	7.9816	7.201	15.4832	0.08	-0.15
1161	15.943	15.562	-1.508	0.115104	15.932	10.345	0.5	12.34	1.869	-1.95193	7.5694	7.548	14.0435	-0.99	-2.15
1160	16.118	15.649	-1.253	-0.0105361	16.352	10.031	0.44	12.02	1.566	-1.35976	7.4269	6.72	14.9715	-1.83	-1.47
1159	16.116	14.444	-0.877	-0.236572	14.935	9.736	0.26	11.4	0.494	-0.606457	7.4436	7.06	15.5675	-0.18
1158	15.665	15.479	-0.549	0.153385	15.578	9.682	0.54	11.51	-0.032	0.138878	6.9315	7.133	15.6641	-0.66
1157	15.058	15.957	-3.2	-0.235375	16.443	9.664	-0.09	10.97	0.539	-1.255	6.9534	7.34	15.6766	-1.01
1156	14.556	15.428	-1.305	-0.108784	16.307	9.316	0.18	10.44	0.415	-1.22368	7.8224	7.379	15.205	-0.21
1155	15.105	15.787	-0.531	0.128348	14.639	9.525	0.6	11.46	0.286	-0.74425	8.031	7.368	15.1944	-0.41
1154	15.546	16.611	-1.088	-0.2739	15.145	8.936	0.17	10.71	0.315	0.239091	7.8061	7.288	13.4226	-0.45
1153	15.471	15.773	1.238	-0.221383	15.038	9.292	0.26	10.53	0.534	0.02443	8.0739	6.982	14.0652	-0.03
1152	15.296	15.598	0.361	-0.661876	15.306	9.228	0.03	10.65	-1.526	-0.226103	7.6411	6.722	15.3177	-0.36
1151	15.116	15.221	-2.136	-0.688541	15.611	9.133	0.01	10.7	-1.332	-0.458984	7.6119	6.572	15.3956	0.11
1150	15.555	14.549	-0.695	-0.525137	15.504	9.074	0.3	9.9	0.633	-0.539838	8.0978	6.638	14.5079	-0.29
1149	15.495	15.203	-0.666	-0.359146	14.433	9.332	0.03	10.5	0.33	0.163362	7.2506	6.469	15.9967	0
1148	15.429	15.125	-0.958	-0.254149	14.033	9.362	0.07	9.81	-0.325	0.17418	7.8251	7.016	14.4397	-0.21
1147	14.672	15.327	0.94	-0.0466827	14.651	9.082	-0.03	10.24	-1.947	-0.764179	7.5576	7.327	14.1531	-0.97
1146	14.584	15.194	1.887	-0.209145	15.561	8.952	-0.24	9.49	-0.057	-0.661688	8.0248	7.089	13.9539	-0.53
1145	14.1	14.453	-0.941	-0.405236	15.561	8.889	-0.36	9.71	-0.533	-0.457276	7.1921	7.486	14.9145	-0.74
1144	14.722	15.06	2.803	-0.277841	15.314	8.78	-0.04	9.4	-0.801	-0.115641	7.8278	7.951	13.3545	-0.17
1143	15.411	15.194	1.962	-0.0119409	15.195	8.772	0.33	10.06	-0.201	-0.863253	8.2847	7.167	15.0668	-0.8
1142	14.981	15.272	0.858	-0.152145	15.862	8.873	-0.4	9.53	-0.583	-0.580835	6.2022	6.82	14.2267	-0.8
1141	15.245	14.77	0.282	0.0326807	14.404	9.061	0.23	10.03	-0.682	-0.169733	7.8005	6.412	11.8818	-0.69
1140	15.037	15.102	-3.297	0.430115	15.532	8.788	0.07	9.81	-0.295	-0.489732	7.292	6.494	12.0825	-0.82
1139	15.273	15.281	0.712	-0.063052	14.976	8.533	0.06	9.23	0.574	-0.699268	6.9704	6.38	14.9323	-0.35
1138	15.156	14.89	-0.005	-0.280414	14.919	8.671	-0.02	9.7	-0.101	-1.63023	6.6403	6.296	11.4767	-0.28
1137	15.46	15.065	1.141	-0.0171881	14.293	8.815	-0.3	9.81	-0.608	-1.44745	7.3728	6.323	12.9588	-0.85
1136	15.392	14.066	-2.429	-0.247145	14.742	9.134	-0.56	10.1	-0.99	-1.15421	7.1603	6.248	12.922	-0.27
1135	15.07	14.094	-0.454	-0.173259	14.215	9.329	0.53	10.99	-0.558	-1.5061	7.7878	6.875	13.2467	-0.32
1134	15.282	13.882	-1.134	-0.209653	15.343	9.104	-0.05	10.11	-0.275	-2.1478	7.7367	6.243	13.0312	-0.78
1133	15.161	15.12	-0.564	-0.215491	15.598	8.669	-0.6	9.45	-0.325	-1.48674	7.754	6.642	12.258	-0.62
1132	14.806	14.798	-1.507	-0.263854	15.104	9.021	0.21	10.24	-0.871	-2.43819	7.4671	8.002	10.5714	-0.45
1131	14.593	14.375	0.489	-0.203115	15.203	8.957	-0.43	9.95	-0.265	-2.04019	7.9713	7.712	10.7968	-0.65
1130	15.189	14.858	0.94	-0.60041	15.224	8.396	-0.86	8.56	-0.717	-1.47364	7.8081	7.333	11.747	-0.97
1129	14.934	14.968	0.126	-0.516469	15.104	8.981	-0.42	9.86	-1.446	-1.70709	7.5205	7.712	11.1564	-0.8
1128	14.588	14.646	-0.664	-0.320825	14.738	8.664	-0.9	9.61	-0.384	-2.15976	8.3221	7.213	11.351	-0.55
1127	15.018	14.802	-1.243	-0.638514	14.75	9.321	-0.99	9.32	-0.389	-1.5061	7.5893	7.078	13.7699	-0.24
1126	15.142	14.945	-0.482	-0.145961	13.832	9.602	-0.28	11.94	-0.498	-0.999338	7.2593	6.973	12.9896	-0.99
1125	15.324	15.221	-3.18	-0.11246	14.54	9.11	-0.21	10.49	-0.032	-2.09029	7.7221	6.925	14.3675	-0.39
1124	15.88	15.212	-1.646	-0.426064	15.541	9.385	0.01	11.18	-0.101	-2.43478	7.5056	7.493	14.075	-0.51
1123	15.581	14.789	-2.576	0.0792203	15.355	9.915	-0.12	12.02	-0.211	-0.550657	7.6903	7.233	14.2637	-0.41
1122	15.39	14.365	-3.726	0.0361943	15.141	9.364	0.02	11.79	-1.545	0.892754	7.9022	6.686	12.8941	-0.74
1121	15.796	13.27	-2.034	-0.300171	14.383	9.332	-0.02	11.06	-1.436	-0.308095	7.7558	6.622	12.6381	-0.27
1120	15.21	13.997	-1.43	-0.192826	14.322	9.122	0.53	10.99	-0.603	-0.384963	7.831	7.057	14.2214	-0.83
1119	15.495	15.217	0.477	-0.1248	15.145	8.993	-0.26	9.83	-0.95	-2.08574	7.8355	6.843	12.9579	0.34
1118	15.102	14.991	-2.887	-0.0454239	15.174	9.362	0.14	10.99	-1.332	-1.91606	6.9322	7.121	13.7143	-1.24
1117	15.168	14.342	0.708	-0.113473	14.878	9.215	-0.44	10.11	-1.506	-2.1683	8.3058	6.688	13.1742	-0.27
1116	14.745	14.48	0.051	0.134776	15.022	9.725	-0.22	10.38	-1.273	-1.17243	7.6843	7.012	11.9669	-0.75
1115	14.941	14.724	-1.393	-0.375277	14.367	9.889	-0.98	10.44	-0.965	-0.88546	8.1342	7.156	10.2343	-1.19
1114	14.656	14.996	-2.209	-0.327873	14.787	9.85	-0.04	11.44	-1.099	-1.61656	8.0024	7.753	11.8277	-0.42
1113	14.595	14.14	-1.884	-0.117742	15.042	10.199	-0.34	12.19	-0.439	-0.572294	8.6452	7.445	11.9207	-0.32
1112	15.063	14.508	-2.644	-0.372791	14.35	9.77	-0.03	10.9	-0.945	-0.867808	8.5489	6.985	14.0166	0.03
1111	15.34	14.112	-1.461	0.0428162	15.186	10.261	-1.37	10.79	0.043	-2.06809	8.4857	7.251	12.1513	-0.99
1110	15.172	13.694	-1.792	-0.377023	16.369	9.096	-0.28	9.47	-0.811	-1.3125	8.9828	7.395	12.8141	0.62
1109	14.953	13.781	-4.782	-0.178838	15.014	10.518	-0.84	10.54	-0.756	-1.25613	7.9194	7.732	11.5603	0.14
1108	14.864	13.74	-0.728	-0.230784	16.171	9.907	0.5	10.8	-0.598	-2.72118	7.7492	7.52	12.0621	-0.23
1107	14.579	15.184	1.058	-0.0514809	15.862	10.011	-0.38	10.77	-0.737	-2.46894	8.5688	7.853	11.9563	0.28
1106	14.376	14.283	1.088	0.276733	16.554	10.293	0.65	11.83	0.291	-2.61698	7.7992	7.529	12.5099	0.05
1105	14.598	14.867	0.915	0.238009	15.475	10.044	0.34	11.28	0.038	-1.6325	8.1218	6.937	12.358	-0.56
1104	14.63	14.637	1.23	0.340929	16.068	10.394	0.82	11.23	-0.895	-1.48788	9.1166	8.093	10.7897	-0.45
1103	14.897	15.525	1.205	-0.324297	16.488	9.801	1.13	11.33	-0.662	-2.86182	7.8539	7.602	12.2703	-0.05
1102	15.147	15.24	0.033	-0.041042	15.804	10.394	0.74	11.23	-0.106	-2.37784	8.3165	6.866	12.3752	-0.45
1101	15.441	16.063	-1.775	-0.117361	14.26	10.16	0.65	11.14	-0.454	-2.1609	8.4275	6.722	11.7532	-0.41
1100	15.109	15.253	-3.712	0.0340225	14.12	10.013	0.06	10.71	-0.201	-1.82894	8.6508	6.843	13.1914	-0.38
1099	15.471	15.272	-3.252	0.198687	14.495	9.886	-0.01	10.77	0.395	-1.13087	7.6005	6.613	13.24	-0.83
1098	14.967	15.184	-3.016	-0.072996	16.727	10.335	-0.6	11.17	-0.459	-0.747097	8.0707	6.98	13.5323	-0.14
1097	14.539	14.968	-0.223	0.313692	15.133	10.649	-0.16	11.92	0.043	-1.57955	8.7221	7.169	13.167	0.4
1096	14.85	15.088	-1.052	0.391713	14.845	9.757	-0.56	10.47	-0.667	-0.452152	8.4483	7.762	14.4389	0.26
1095	14.92	14.936	0.798	-0.001389	16.08	10.513	-0.04	11.05	-0.742	-1.54026	7.3071	7.463	14.308	-0.89
1094	14.752	15.161	-0.891	0.0425509	15.627	11.04	-0.46	12.12	-0.161	-1.78111	7.3943	6.572	14.0284	-0.14
1093	14.929	14.296	-1.47	0.371883	16.657	11.532	0.34	12.2	-0.235	-1.70652	9.1477	7.39	14.6353	-0.67
1092	15.147	14.94	-2.295	0.145505	16.377	12.215	1.2	13.47	-0.613	-2.55606	7.8537	7.096	13.1794	-0.5
1091	15.387	14.945	1.525	0.422213	17.641	11.907	0.42	12.95	-0.791	-3.32815	8.4283	6.82	14.2285	-0.58
1090	15.13	14.301	1.756	0.335008	16.126	10.602	0.03	11.81	-0.975	-1.6177	7.969	7.81	15.8361	-1.12
1089	15.112	13.418	0.392	0.141223	15.602	11.579	-0.71	12.48	-0.349	-2.26567	7.6586	7.967	15.7309	-0.62
1088	15.658	13.132	-3.682	0.137868	16.175	10.641	0.53	12.31	-1.039	-1.65129	8.0687	7.97	15.128	-1
1087	16.184	13.293	1.115	-0.425283	16.702	10.13	-0.34	11.63	-0.057	-2.29926	8.5853	7.808	13.75	-0.76
1086	15.759	13.896	-1.311	-0.30529	17.901	10.005	1.23	12.34	-0.359	-1.67407	8.332	7.965	14.7371	-0.6
1085	15.186	15.295	-1.865	0.336218	17.686	10.04	-0.32	10.98	-0.082	-1.60119	8.7934	8.394	13.4319	-0.07
1084	15.102	13.951	0.387	-0.477327	17.522	9.544	0.6	10.87	0.048	-2.41656	7.8256	8.369	13.655	-0.18
1083	14.822	14.099	0.795	-0.299733	16.739	9.56	-0.08	10.18	-0.096	-1.91435	8.9001	7.666	14.0053	-0.35
1082	14.056	13.933	-0.727	-0.0957718	16.175	9.285	-0.22	10.85	-0.434	-1.28688	9.5699	8.218	13.8139	-0.84
1081	14.717	14.177	0.149	0.172357	16.373	8.967	0.14	11.16	0.057	-1.76973	9.4656	7.281	15.2703	-0.06
1080	15.065	14.968	-3.389	0.289221	16.191	9.258	0.37	11.15	-0.493	-1.11606	8.806	7.226	15.9276	-0.16
1079	14.736	13.891	-1.646	-0.25652	17.357	9.429	0.26	11.58	-1.014	-2.00432	8.186	8.013	15.1419	-0.04
1078	14.649	13.965	-0.101	0.0204908	16.397	9.267	-0.09	10.76	-0.766	-2.43819	8.172	7.675	14.7289	-0.9
1077	14.654	14.278	-3.283	-0.0707873	16.583	9.418	-0.4	10.12	-0.861	-2.2446	8.0599	8.439	13.4823	-1.22
1076	14.413	14.052	-0.68	-0.457893	15.841	9.934	0.37	11	-0.92	-1.91094	8.6597	7.867	12.1255	0.16
1075	14.869	14.462	0.024	-0.238351	16.323	9.971	0.37	10.41	-1.521	-2.68702	8.0793	7.124	15.3159	-1.17
1074	15.228	14.439	-0.881	-0.389912	16.632	9.947	0.01	10.51	-1.302	-1.6809	7.9561	7.144	12.5565	0.9
1073	14.92	14.513	1.82	-0.294955	16.451	10.183	-0.47	10.64	-0.885	-1.82268	8.0174	7.183	13.6606	0.09
1072	15.002	14.347	-3.411	0.104884	16.29	10.024	-0.6	10.85	-1.392	-0.591084	7.7616	7.402	15.4162	-0.94
1071	15.142	14.982	0.055	0.148338	13.193	10.455	0.2	11.3	-0.935	-0.797204	7.5805	7.114	13.6823	-1.26
1070	15.319	14.6	-0.088	-0.12501	15.813	10.098	-0.14	10.83	-0.905	-1.78055	7.2944	7.288	15.3469	-0.94
1069	14.99	14.444	-0.591	-0.193073	15.405	9.862	-0.56	10.21	-0.95	-0.727168	7.3574	7.076	14.8143	-0.81
1068	14.679	13.97	-1.345	-0.0616863	14.968	10.015	-0.85	10.12	-0.032	-0.455568	7.5521	7.083	14.9715	-0.98
1067	15.056	14.471	-0.392	-0.307783	15.714	10.064	-0.25	10.35	-0.077	-1.13713	7.0344	6.971	13.6765	-0.77
1066	14.708	14.802	-0.247	0.355584	16.525	10.699	0.29	10.79	-0.776	-1.62282	7.8508	6.875	13.7607	-1.27
1065	14.507	14.595	-3.002	-0.0456096	15.78	10.34	0.57	10.58	0.345	-1.98268	7.5277	6.768	13.9587	-0.61
1064	14.437	14.425	0.725	-0.167015	16.373	10.284	0.21	11.05	0.445	-2.11079	6.8878	7.281	12.2593	-0.15
1063	14.759	14.122	-1.135	-0.449324	16.583	10.593	0.05	10.44	0.048	-0.555212	7.436	7.714	15.0511	-0.88
1062	14.953	15.102	-1.145	0.189095	15.693	11.678	0.73	11.99	0.043	-0.985103	8.4525	7.475	14.0106	-0.27
1061	14.85	14.416	1.314	-0.297089	16.01	11.153	1.03	11.66	0.196	-1.27094	8.536	7.605	14.4409	-0.55
1060	14.637	14.177	0.517	0.0581066	15.331	10.195	1	10.89	0.846	-1.0335	8.1486	7.669	14.6063	-0.26
1059	14.224	13.776	-1.353	-0.224127	16.257	10.97	0.1	10.61	0.072	-1.53514	7.5856	7.124	14.482	0.57
1058	14.469	13.868	0.113	-0.1688	16.22	11.038	1.07	11.46	-0.548	-1.92973	6.9656	7.083	12.9126	-0.43
1057	14.628	13.629	1.178	-0.204042	16.027	10.727	-0.04	11.13	-0.603	-0.417419	8.1603	7.593	13.4826	0.16
1056	14.374	13.036	0.978	-0.332872	14.511	10.659	0.24	10.78	-1.029	-1.43378	9.1887	7.582	12.3129	-0.42
1055	14.441	13.965	1.543	-1.03217	14.939	10.123	-0.02	11.07	-0.369	-0.882043	8.9714	7.459	14.3082	-0.37
1054	15.275	13.845	-0.294	-0.330515	15.158	9.778	0.39	10.74	-0.687	-1.45827	8.7547	7.322	13.1374	-0.16
1053	14.929	13.947	0.751	-0.302207	15.948	9.674	-0.37	10.05	-0.434	-0.739126	8.16	7.573	14.1825	-0.49
1052	15.366	14.269	0.064	-0.189644	16.517	10.671	0.42	11.43	0.335	-0.562614	8.2731	6.866	11.9467	0.01
1051	15.301	13.303	-5.271	-0.33996	16.068	10.399	1.51	11.58	0.062	0.353539	8.6954	6.987	13.3702	-0.26
1050	15.315	13.625	-1.653	-0.185238	15.631	9.984	0.68	10.32	1.462	-0.404323	9.6326	7.153	13.7406	0.08
1049	15.051	13.638	-0.065	-0.241365	17.616	9.93	0.87	10.37	1.144	0.0688426	8.3238	7.345	14.3465	-0.2
1048	15.34	14.296	0.729	-0.258189	16.43	10.333	0.86	10.77	0.678	-0.379839	9.0228	6.494	12.7983	0.57
1047	15.137	14.209	-1.562	-0.538734	16.249	10.027	-0.57	9.91	1.08	-1.41499	9.248	6.845	13.5781	-0.29
1046	14.623	13.473	0.477	-0.24435	15.965	9.617	-0.05	10.1	0.598	-2.59193	8.5108	6.471	14.4623	0.75
1045	15.364	14.375	-1.616	-0.485058	15.462	10.467	0.64	10.45	0.251	-0.501689	8.7837	6.378	13.6347	0.71
1044	14.955	15.235	0.4	-0.269723	15.883	10.668	-0.17	10.44	0.554	-1.12517	8.195	6.558	13.1469	0.37
1043	14.878	15.134	0.566	-0.130036	15.219	10.56	-0.44	10.73	-0.796	-1.23564	8.2749	7.981	12.8831	-0.04
1042	14.577	15.391	-1.83	-0.0117447	14.873	9.746	-0.02	9.81	-0.047	-0.927025	9.087	7.404	12.143	1.07
1041	14.775	14.057	0.417	-0.249013	15.957	9.673	-0.82	9.7	-0.245	-0.36902	9.0526	7.194	14.3163	0.02
1040	15.773	14.664	-0.714	-0.38579	16.311	10.091	-0.05	10.62	-0.518	-0.929872	9.1832	7.267	12.9328	-0.33
1039	15.116	13.606	0.113	-0.308322	16.62	10.143	0.34	10.72	0.191		8.6181	7.413	14.1074	-0.44
1038	15.03	13.28	0.844	-0.144058	16.076	10.075	0.12	10.29	0.315		8.7959	7.632	13.4591	-0.09
1037	15.593	14.637	-2.106	-0.0276957	15.1	10.801	0.52	11.28	0.846		7.8605	7.263	13.8207	-0.76
1036	15.387	13.758	-1.959	-0.117512	16.142	10.54	-0.32	10.69	0.216		8.1569	7.384	14.4745	-0.5
1035	15.002	14.375	-0.677	0.0472902	15.977	10.381	0.93	10.37	0.147		9.343	7.203	13.2953	-0.02
1034	15.186	14.145	0.762	-0.788279	16.266	10.165	0.28	11.18	0.311		8.9618	7.5	13.1648	0.52
1033	15.013	13.712	1.337	-0.350035	15.64	10.05	-0.85	10.92	0.524		9.7258	7.897	12.4018	0.27
1032	15.838	14.025	-0.789	-0.329152	14.449	9.849	-0.16	9.98	-0.007		9.2822	7.523	12.4424	-1.48
1031	15.245	13.928	0.535	-0.57309	14.964	10.789	-0.45	10.82	1.149		9.0805	8.147	11.4635	-0.06
1030	14.733	13.928	-0.217	-0.179425	16.99	10.806	-0.6	11.46	0.251		8.1041	8.266	11.7666	-0.05
1029	15.301	13.257	0.646	-0.286637	16.068	9.933	0.13	10.84	-1.029		8.6589	7.735	11.555	-0.76
1028	15.446	14.319	0.032	-0.44556	17.11	10.095	0.42	10.96	0.653		9.1563	6.93	13.3962	0.61
1027	15.172	13.381	1.461	-0.0635372	16.789	10.957	0.05	11.17	-0.027		8.8645	6.392	11.6921	-0.33
1026	15.565	13.422	2.101	-0.729883	15.854	10.416	0.07	11.02	0.663		8.6789	6.435	14.2595	-0.09
1025	15.436	14.099	-5.484	-0.541413	15.862	10.722	0.48	11.94	-0.146		7.552	6.305	13.8625	-0.59
1024	15.102	13.873	1.566	-0.0931983	14.845	10.461	-0.63	11.03	0.092		7.8344	6.396	12.4642	0.17
1023	15.469	13.625	0.749	-0.13197	15.714	9.821	0.25	9.84	0.038		7.3185	7.541	13.8105	0.31
1022	15.448	14.296	1.463	-0.418056	16.393	10.686	-0.51	10.95	-0.077		7.3202	6.912	13.7943	-0.29
1021	15.256	13.293	0.467	-0.495056	14.725	10.494	0.33	11.06	-1.456		6.5883	6.645	11.6532	0.58
1020	14.834	13.477	1.005	-0.607682	15.121	10.586	0.08	11.64	-1.526		6.997	6.813	12.8263	0.5
1019	14.479	13.091	-2.564	-0.104756	15.487	10.742	0.37	11.78	0.43		8.0461	7.187	13.847	0.14
1018	14.339	13.376	-1.856	-0.345697	16.611	10.064	0.65	10.84	-0.474		6.9441	8.366	13.5651	0.69
1017	14.448	13.362	2.517	-0.718631	16.047	9.643	-0.41	9.73	-0.111		6.7629	7.862	13.1703	0.2
1016	14.462	12.879	1.584	-0.181191	16.233	9.511	0.09	10.43	-0.935		7.4528	7.673	12.9113	0.35
1015	14.824	12.778	0.799	-0.34952	17.588	9.377	-0.16	9.64	-0.186		6.4831	7.431	14.4072	-0.06
1014	14.901	13.629	-0.687	-0.505437	16.595	9.758	-0.45	10.38	-1.223		6.6202	7.149	13.9545	0.47
1013	15.051	13.413	-2.156	-0.270414	16.735	9.92	-0.25	10.08	0.186		7.0323	6.688	13.772	-0.18
1012	15.537	14.319	-0.432	-0.269254	17.052	9.754	-0.96	10.34	-0.364		7.086	6.563	13.0461	-0.6
1011	15.782	13.684	-2.699	-0.545622	16.929	10.087	0.03	10.79	-0.32		6.8588	6.383	14.1778	-0.46
1010	15.282	14.241	-2.743	-0.308966	17.415	10.004	0.12	10.03	-0.022		7.7904	6.275	13.775	0.27
1009	14.602	14.112	-0.628	-0.468883	16.509	9.933	0.02	9.92	0.226		7.7885	7.789	13.9534	0.15
1008	14.647	13.873	0.16	-0.354815	17.814	10.953	-1.15	10.01	0.752		7.3161	8.013	14.4261	-0.76
1007	14.427	13.036	-2.423	-0.415746	18.012	11.163	-0.2	11.11	-1.347		7.3194	8.122	12.144	-1.4
1006	15.368	13.293	-2.693	-0.370656	16.261	11.287	0.08	11.18	-0.364		8.48	8.225	12.8738	-0.32
1005	14.719	13.666	-1.922	-0.188979	17.32	11.23	0.25	11.17	0.454		7.6221	7.71	12.6114	-0.47
1004	14.701	14.14	-5.824	-0.223787	16.06	11.122	0.03	11.03	-0.895		7.026	8.029	12.7389	-0.88
1003	14.974	13.542	-3.482	0.0745036	17.773	10.718	-0.57	10.95	0.4		8.0294	7.988	12.4776	-0.57
1002	14.789	13.441	-5.324	0.289375	16.941	11.056	0	11.59	-0.23		7.5124	7.133	11.5592	-0.1
1001	14.95	13.919	-2.023	0.227829	15.99	10.966	-0.89	11.53	-0.091		7.3829	6.729	11.9491	-0.8
1000	14.771	12.778	-0.264	-0.00775407	14.849	11.543	0.51	12.36	-0.593		7.973	7.224	13.3363	-0.05
999	14.941	13.809	-1.272		15.64	11.001	0.04	11.36	-0.037		7.1615	7.897	11.289	-0.62
998	15.095	13.905	2.176		17.316	10.998	-0.62	11.38	-0.538		7.6799	7.981	12.0262	0.2
997	15.324	13.891	-1.216		17.575	11.135	-0.2	11.97	-0.171		7.2517	8.152	12.8581	-0.28
996	15.037	14.26	2.417		16.669	10.638	-0.35	11.18	-0.216		7.0222	7.776	13.0823	-1.1
995	15.368	13.661	3.371		16.747	10.598	0.23	11.82	-0.771		7.3023	7.906	13.9253	-0.7
994	15.579	14.223	-2.028		16.039	11.236	-0.69	12.01	-0.518		7.5979	7.641	13.2912	-0.3
993	15.726	14.637	1.21		16.883	9.957	-0.22	10.59	0.866		7.5751	7.698	12.7617	0.11
992	15.569	15.805	0.294		16.224	10.537	-0.22	11.39	-0.469		6.4092	7.356	12.3541	-0.91
991	14.918	14.623	-2.295		16.912	10.316	-0.72	10.86	-0.191		7.2935	6.982	14.3322	-0.3
990	14.764	14.816	1.685		16.99	11.089	0.12	12.1	-0.082		5.4471	7.24	13.9651	-0.96
989	14.764	16.229	1.294		15.804	10.545	-0.76	10.07	-0.464		7.3827	7.443	13.6344	-0.29
988	14.465	15.226	0.679		15.705	9.981	0.45	10.41	-0.067		8.174	7.986	13.1653	-0.82
987	14.969	15.792	0.856		15.685	11.254	-0.21	11.36	-0.186		7.954	7.493	12.9163	-1.28
986	14.953	14.356	1.627		15.742	10.589	0.47	11.35	0.534		7.2701	8.161	13.1965	-0.55
985	15.354	14.338	-2.681		15.825	9.639	-0.01	9.73	0.688		6.2138	7.194	14.574	-2.08
984	15.756	13.753	-0.004		14.869	10.226	0.28	10.17	0.544		8.8797	6.994	13.3173	-0.74
983	15.088	15.824	-0.069		14.173	10.573	-0.15	10.73	0.375		8.4152	7.026	10.9689	-1.33
982	14.658	14.632	0.083		15.133	10.614	0.74	12	0.033		8.2347	6.604	11.96	-1.01
981	14.953	15.336	-0.708		13.799	10.242	-0.63	10.26	-0.101		8.7454	7.171	11.338	-1.07
980	14.974	14.77	1.634		14.445	9.752	0.2	10.76	-0.091		8.7061	7.648	12.8012	-0.24
979	15.107	15.778	0.181		13.551	9.722	-0.41	9.55	0.177		8.6436	8.36	11.8321	-0.54
978	14.983	15.253	0.681		14.696	10.661	0.4	11.19	-0.538		9.1088	7.716	11.6041	-0.5
977	15.114	14.319	0.355		14.466	10.226	0.23	11.03	-0.677		7.9042	8.036	13.3549	-0.35
976	15.441	15.009	-0.993		14.779	10.474	0.27	10.29	-0.756		8.5063	7.331	13.1947	-0.3
975	15.238	14.407	-0.84		14.264	10.659	-0.42	11.28	-0.384		8.6696	7.587	13.9341	-0.4
974	14.96	14.126	-2.715		14.392	10.506	-0.55	10.24	-0.578		7.837	8.204	12.6983	-0.17
973	14.894	14.103	-2.612		14.647	10.588	-0.1	10.88	-0.786		8.7242	7.153	13.2506	-0.34
972	15.158	13.56	-5.544		14.375	11.174	0.71	11.43	-0.593		8.8311	6.647	13.2261	-0.04
971	15.009	14.549	-2.158		14.672	10.536	-0.25	10.79	-0.603		8.6874	6.047	12.9469	0.31
970	14.871	14.103	-0.487		14.808	11.04	0.01	10.21	0.097		6.5508	5.844	13.7917	0.04
969	15.086	14.052	-0.701		14.898	10.986	0.28	10.61	-0.434		8.7404	6.585	12.4107	0.09
968	14.962	14.724	0.818		15.261	9.814	-0.13	9.75	-0.305		6.794	8.964	13.2295	-0.13
967	15.151	14.655	-1.624		14.42	10.113	-0.76	10.21	-0.742		8.5979	9.422	10.7687	-0.67
966	15.621	14.559	-3.148		14.025	10.163	-0.14	9.8	0.226		9.1253	9.094	13.2265	-0.59
965	15.691	14.848	2.318		13.362	9.635	-0.65	9.56	0.494		8.7038	9.24	11.9621	-0.51
964	15.518	15.069	-1.69		13.465	9.926	-0.34	10.04	0.206		8.3492	9.069	12.453	-0.32
963	15.422	14.439	0.091		14.021	9.99	0.12	10.04	-0.617		9.0481	8.638	10.5151	0.04
962	15.359	14.738	-2.051		13.757	8.973	-0.15	9.95	-1.034		7.9012	9.199	12.8247	-0.54
961	14.992	14.513	0.002		14.536	8.816	-1.13	8.84	-0.513		8.693	8.597	11.718	-0.33
960	14.857	14.807	-0.816		13.547	10.146	-0.05	10.53	0.454		7.6499	8.423	12.5195	-0.42
959	14.658	13.753	-1.934		13.37	10.011	-0.21	10.41	-0.34		7.0154	8.166	12.3332	-1.13
958	14.74	13.942	-3.13		14.635	9.702	-0.52	9.38	-0.196		7.5337	8.031	11.2518	0.09
957	14.752	13.786	0.291		14.552	9.671	-0.23	10.09	-0.161		8.0156	9.452	11.8171	-0.71
956	15.116	13.054	-3.479		14.276	8.975	0.15	9.25	0.623		8.4345	9.47	11.2776	-0.32
955	15.294	13.993	-1.69		15.755	9.871	0.04	10.07	-0.419		7.6946	8.629	12.3888	-1.33
954	15.681	15.051	0.93		15.553	9.726	-0.36	10.34	-0.657		7.6694	7.65	11.1305	-0.58
953	15.273	15.327	0.264		14.429	9.503	-0.66	10.63	0.043		8.083	6.871	12.265	-0.57
952	15.224	15.58	-0.902		15.817	9.55	-0.52	10.14	0.023		8.4088	6.827	12.8941	-1.26
951	15.565	15.157	-2.206		14.235	9.795	0.1	11.22	0.39		9.0292	7.217	13.0464	-1.11
950	15.861	14.913	-0.455		15.747	9.293	-0.41	10.13	0.221		7.9089	8.065	12.4331	-0.7
949	15.969	15.41	1.126		15.388	9.743	-0.02	10.33	0.167		8.992	9.117	13.6048
948	15.927	15.056	-0.219		14.486	9.566	-0.26	9.74	-0.086		8.3599	8.893	13.0944
947	15.896	14.871	-1.037		15.285	9.658	0.11	10.39	-0.831		8.9845	8.175	13.1066
946	15.857	14.287	-0.99		14.865	10.072	0.32	10.6	-0.876		8.1484	8.576	12.3267
945	15.38	14.402	1.577		14.379	10.2	0.14	10.8	-1.019		7.4358	8.804	11.468
944	15.163	14.687	0.019		14.285	9.656	-0.14	10.41	-1.952		8.1605	9.098	12.4864
943	14.694	13.997	-1.311		13.37	9.673	-0.41	10.09	-1.243		8.2416	8.647	11.8004
942	14.563	14.756	-0.805		13.469	10.305	-0.14	10.64	-1.278		7.3821	7.491	13.4499
941	14.934	15.447	0.724		15.104	9.482	0.27	9.57	-0.245		8.6993	7.4	13.4197
940	15.149	15.06	-4.793		15.866	10.707	-0.33	10.26	-1.575		7.3979	6.77	12.8241
939	15.319	15.249	1.518		14.931	11.158	0.64	11.3	-1.357		7.772	7.748	13.2635
938	15.976	15.042	-1.151		14.63	11.143	-0.24	10.55	-0.642		8.5593	8.088	13.4485
937	16.352	15.695	1.204		15.479	10.734	-0.18	10.93	-0.454		8.019	8.341	12.5399
936	15.913	15.621	2.158		15.413	11.577	0.16	11.26	0.018		8.8289	8.216	11.8897
935	15.495	14.848	1.063		13.799	11.95	0.4	12.13	-0.662		8.4155	8.02	14.0465
934	15.7	15.557	-0.128		14.997	11.849	0.6	11.95	-0.032		8.0026	7.415	11.6033
933	15.378	14.816	0.34		15.821	10.99	0.2	11.82	-0.414		8.149	8.052	13.0595
932	15.03	15.203	-4.515		15.981	10.786	-0.09	11.34	0.003		8.2648	8.309	12.8668
931	15.371	13.983	-0.397		16.451	11.278	0.2	11.43	-0.672		8.3274	8.054	12.6018
930	15.156	15.433	-2.761			10.401	0.13	11.33	-0.662		7.8958	8.341	14.1111
929	14.789	14.568	-1.378			10.332	0.04	11.18	0.489		8.0058	8.444	14.1985
928	14.957	14.246	-0.799			10.549	0.31	11.5	0.112		9.2778	7.639	12.8783
927	15.186	14.605	-0.35			10.055	-0.25	9.96	-0.23		7.4301	7.997	12.7
926	14.99	14.485	-0.294			9.499	-0.01	10.4	-0.503		7.8059	7.673	12.6533
925	15.175	14.986	-2.965			10.311	-0.93	10.77	-0.796		7.8676	7.577	11.2726
924	15.035	14.448	0.283			9.766	-0.07	11.07	-0.608		8.2017	7.555	13.2749
923	14.981	14.549	0.904			9.878	-1.3	10.67	-0.637		7.5819	7.322	13.3319
922	14.813	14.885	1.055			9.633	-0.37	10.98	-0.692		7.559	6.743	13.3718
921	14.92	14.108	-1.224			9.582	-1.09	10.3	-1.029		8.2526	6.791	13.7479
920	14.803	14.122	-1.356			9.774	-0.48	11.16	-0.975		6.8438	7.244	14.1388
919	14.946	13.956	-1.402			10.168	-0.88	11.4	-0.474		5.9576	7.867	14.3282
918	14.955	13.914	-0.416			9.695	-1.09	10.45	-0.866		7.3582	7.885	13.8235
917	15.352	13.956	-0.17			10.048	-0.94	10.56	0.072		6.6287	7.609	14.2824
916	15.558	13.454	-2.663			9.239	-0.78	10.98	0.479		6.6978	7.34	12.5195
915	15.126	14.273	-2.615			9.131	-1.11	11.06	-0.191		6.87	8.093	13.6048
914	15.263	13.215	-4.633			9.107	-0.37	9.84	0.018		6.2254	7.869	14.4164
913	14.696	14.398	-1.355			9.329	-0.86	10.38	-0.374		6.5304	7.413	13.6048
912	14.574	14.14	-4.259			9.81	-0.4	11.71	-0.389		6.8029	7.443	13.8235
911	14.362	13.878	0.226			9.216	-0.59	10.08	-1.109		5.1546	7.878	14.7485
910	14.374	13.381	-0.052			9.407	-0.86	10.32	-1.888		6.6908	7.356	14.6206
909	14.558	13.063	-3.06			9.497	-0.81	10.83	-1.094		6.7433	6.896
908	14.794	13.464	-3.28			9.439	-0.88	10.55	-0.811		6.6899	7.085
907	14.845	13.855	-4.201			9.519	-1.49	10.09	-1.555		6.5825	7.637
906	14.661	13.123	-1.895			9.588	-1.02	10.5	-0.9		6.1635	7.035
905	14.682	13.85	-2.761			9.877	-0.78	10.43	-0.498		6.2581	7.349
904	14.626	13.611	-3.622			10.016	-1.15	10.43	-0.712		6.5638	7.201
903	15.14	13.427	-5.277			9.878	-1.47	10.38	-0.424		6.9158	6.747
902	14.922	13.413	-0.478			9.82	-1.1	10.01	-0.469		7.2755	7.171
901	14.992	14.6	-3.733			10.209	-0.31	10.72	-0.22		7.2942	7.028
900	14.978	14.006	-1.884			10.203	-1.45	10.06	-0.31		6.8772	6.918
899	14.969		-0.506			10.915	0.08	11.35	-0.88		7.5963	7.112
898	15.013		1.204			10.265	-0.6	10.2	-0.608		7.0986	6.845
897	15.256		0.465			10.381	-0.6	11.38	-0.216		7.2066	6.77
896	14.925		1.181			9.956	-0.92	10.68	-1.62		7.6931	7.379
895	14.644		0.558			10.294	-0.61	11.12	-0.766		8.3625	8.72
894	14.567		0.929			9.891	-0.29	11.35	-0.31		8.9617	8.891
893	14.99		1.458			9.669	-0.32	10.91	-0.513		6.2475	8.526
892	15.102		0.059			10.115	0.9	10.82	0.196		7.0354	8.173
891	14.88		-0.901			10.656	0.69	12.25	0.177		6.745	7.229
890	14.773		0.694			10.609	1.39	11.32	0.052		7.165	6.77
889	15.163		-0.843			9.775	0.06	10.35	0.405		6.9968	6.946
888	15.338		-3.059			10.548	0.54	10.98	0.172		7.0966	6.519
887	15.025		0.185			11.126	0.52	12.14	0.107		7.5899	6.768
886	14.383		1.004			9.959	0.7	11.59	0.618		7.0709	8.027
885	14.497		-0.134			10.5	0.71	12.54	0.37		6.459	7.999
884	14.661		-6.295			10.463	0.19	11.57	-0.573		6.8219	7.386
883	14.925		0.174			10.702	1.06	11.75	0.311		7.7883	7.951
882	14.778		1.31			9.449	0.6	11.19	0.583		7.1279	8.604
881	14.953		-4.565			10.223	0.08	10.38	0.529		6.8426	8.011
880	15.688		-1.871			10.295	0.85	11.78	0.564		7.0184	7.39
879	15.548		1.894			10.671	0.5	11.31	-0.027		7.2717	6.875
878	14.983		0.259			10.198	0.68	11.21	-0.275		8.6496	7.566
877	15.072		2.145			10.722	0.26	11.11	-1.114		8.4328	7.559
876	14.708		-0.117			10.551	0.99	11.67	-0.151		8.0198	8.079
875	14.588		-1.147			10.251	0.09	10.92	0.42		8.1687	7.803
874	14.289		-0.074			10.541	-0.21	11	-0.077		7.6811	8.134
873	14.53		-1.478			9.639	0.6	10.65	-0.171		6.6496	8.198
872	15.294		-1.354			10.447	0.51	10.85	-0.474		7.1376	7.815
871	15.233		-3.001			9.829	0.57	11.26	-0.662		7.191	7.564
870	15.037		-1.213			9.676	0.7	10.3	-0.672		7.1311	7.233
869	14.843		-0.543			9.962	1.39	11	-0.002		6.4367	6.672
868	14.808		-3.865			9.509	0.56	10.19	-0.528		7.3268	6.859
867	14.946		-3.749			9.079	-0.02	9.92	-0.464		7.2837	6.497
866	14.549		-1.392			9.086	1.11	9.49	-1.029		7.6311	6.294
865	14.493		-1.899			8.666	-0.05	8.65	-1.005		8.2713	6.503
864	14.343		-1.448			8.865	0.2	9.91	-0.598		8.829	6.136
863	14.203		-0.134			8.882	0.57	10.07	-0.975		8.6974	6.827
862	14.079		0.849			8.908	0.06	9.49	-0.786		8.164	7.338
861	14.427		-0.642			9.12	0.11	9.56	-1.039		7.8341	7.696
860	14.133		-1.674			9.328	0.06	10.24	-1.019		7.7519	7.764
859	13.953		-1.274			8.974	0.02	9.85	-0.935		8.4143	7.933
858	14.212		1.339			8.923	-0.15	9.35	-0.027		8.2054	7.81
857	14.047		-0.329			9.798	-0.29	10.48	-0.598		7.6972	7.694
856	14.327		-1.819			9.217	-0.25	10.1	-0.434		7.265	6.2
855	14.708		-1.162			9.411	0.22	10.96	-0.811		8.094	6.9
854	15.296		-3.147			8.979	-0.18	10.02	-0.345		6.6112	6.383
853	14.985		-2.078			9.201	-0.89	9.77	-0.275		8.2059	6.321
852	14.46		-2.534			8.494	0.24	9.35	-0.558		8.1934	6.889
851	14.633		-0.289			8.64	0.24	9.33	0.375		7.9241	6.674
850	14.621		-0.968			9.522	0.74	10.52	0.062		9.2492	7.488
849	14.507		-0.091			10.023		10.7	-0.568		8.6681	7.039
848	14.738		-0.329			8.945		9.75	0.013		8.4636	8.225
847	15.046		0.208			9.482		9.85	-0.275		7.8489	7.461
846	14.649		-2.968			10.682		10.78	-0.186		8.4863	7.628
845	14.969		-1.412			10.838		11.89	-0.106		9.9966	7.194
844	14.579		-0.143			10.294		10.59	0.286		7.5328	7.842
843	14.803		0.258			10.069		11.27	-0.513		9.6761	7.769
842	14.906		-3.59			10.259		10.9	0.504		7.8412	8.061
841	14.708		0.959			10.403		10.63	-0.186		8.1853	7.523
840	14.712		1.696			10.449		10.55	0.072		8.443	7.055
839	14.6		0.935			10.415		11.21	-0.201		8.4649	6.636
838	14.065		1.421			9.472		10.47	-1.282		7.737	6.54
837	14.219		-0.184			10.217		11.64	-0.851		8.0816	6.886
836	14.488		0.41			10.16		10.79	-0.558		8.2856	6.761
835	14.922		0.903			9.887		11.09	-0.856		8.09	6.893
834	15.063		0.803			10.238		10.84	-1.039		9.7189	8.07
833	15.513		-1.526			9.909		11.56	-1.074		9.5622	8.79
832	15.74		-2.35			9.829		11.11	-1.694		9.6523	7.634
831	15.609		-1.932			9.789		10.71	-1.387		9.2102	7.534
830	15.784		-2.479			10.059		11.06	-1.689		9.1758	6.798
829	15.38		-2.203			9.406		10.43	-2.22		9.1191	7.213
828	15.154		0.694			9.5		10.51	-1.55		9.8377	6.804
827	15.051		-3.206			9.757		11.69	-2.473		8.8506	6.341
826	14.901		-2.359			9.572		11.14	-1.729		9.3336	6.912
825	14.712		-0.408			9.489		10.87	-1.342		9.236	6.839
824	14.74		2.266			8.382		9.26	-1.109		8.7344	6.756
823	14.918		0.399			9.385		10.26	-1.144		8.813	7.484
822	14.647		0.977			9.537		10.26	-1.402		7.9804	8.861
821	14.479		1.103			9.499		10.39	-1.178		8.7775	7.646
820	15.086		-0.714			9.254		10.41	-0.469		8.2117	7.669
819	15.058		-1.504			8.814		9.21	-0.459		8.8818	8.161
818	15.023		-4.549			8.822		9.08	-0.196		8.8389	7.516
817	14.507		-4.188			8.907		9.16	0.117		9.0527	7.591
816	14.773		-5.339			9.182		9.97	-0.915		7.6916	7.149
815	15.095		-3.718			8.587		9.1	-1.014		8.0556	7.532
814	15.217		-4.812			8.916		9.47	-0.449		8.3616	7.311
813	14.978		-3.474			8.715		9.87	0.177		7.5042	8.061
812	14.628		-1.592			8.463		9.33	0.102		8.2174	7.358
811	14.796		-1.561			8.984		9.92	-0.523		8.1271	8.298
810	14.532		-3.997			8.732		9.48	-0.384		8.3074	7.685
809	14.834		0.112			8.383		9.08	-1.352		8.2103	8.036
808	13.902		0.624			9.052		9.37	-0.915		9.5301	8.435
807	14.355		-2.336			8.639		9.13	-1.57		8.3197	7.976
806	14.71		-2.961			8.624		9.28	-0.791		8.9001	7.872
805	15.154		0.173			8.609		9.16	-1.148		7.86	7.653
804	14.637		-2.483			8.179		8.87	-0.722		8.0817	7.153
803	14.679		-2.122			8.412		9.14	-1.6		7.0421	7.133
802	14.593		-1.727			8.588		9.52	-0.588		8.8306	7.062
801	14.719		-3.054			8.939		10.17	-1.034		8.463	7.427
800	14.747		-3.576			8.439		8.62	-1.62		9.0826	7.685
799	15.02		0.149			9.355			-1.287
798	15.154		-0.095			8.92			-1.029
797	14.913		-2.133			9.494			-0.503
796	14.549		-0.917			9.265			-0.811
795	14.908		0.09			9.587			0.038
794	15.03		-0.481			9.645			-0.737
793	14.887		-0.079			9.894			-0.042
792	14.934		1.451			9.641			-0.196
791	14.948		-4.85			9.85			-0.315
790	14.999		1.298			9.983			-0.672
789	15.172		-1.171			9.029			0.112
788	15.1		-0.533			9.475			-0.211
787	15.698		-0.913			9.974			-0.027
786	15.541		0.719			10.228			-0.345
785	15.766		-0.514			10.208			-1.148
784	15.343		-2.012			10.2			-1.461
783	15.046		-0.815			9.581			-0.677
782	14.563		-0.416			10.211			-0.181
781	14.985		-0.239			10.028			-0.429
780	15.042		-0.41			10.412			-1.059
779	14.859		-2.302			10.394			-1.436
778	14.983		0.435			9.984			-0.151
777	15.044		-2.393			9.906			-0.235
776	15.277		-0.326			9.109			-0.444
775	15.301		-2.562			9.78			-0.354
774	15.142		-2.235			9.195			-1.005
773	15.02		-3.816			9.706			-1.124
772	15.13		-4.445			10.181			-0.801
771	15.027		-3.176			10.372			0.673
770	14.574		-1.974			9.618			1.124
769	14.927		-0.104			9.735			1.373
768	14.635		0.233			10.959			0.39
767	14.857		0.466			10.301			0.082
766	14.493		-1.977			9.981			0.435
765	14.759		0.988			10.511			0.226
764	14.743		0.988			10.705			1.08
763	15.006		-2.795			10.884			0.266
762	14.976		-0.41			10.294			0.593
761	14.679		-2.503			11.72			0.35
760	14.374		-2.401			10.894			0.127
759	14.409		-3.418			10.974			0.717
758	14.637		-0.183			11.141			0.137
757	15.497		-4.128			10.812			-1.282
756	15.179		0.612			10.45			-0.26
755	15.392		0.397			10.798			-0.766
754	15.284		-2.41			10.917			-1.039
753	15.273		0.751			10.318			-0.682
752	15.775		1.209			9.518			-1.387
751	15.467		-0.538			10.266			-1.228
750	14.934		0.555			10.1			-0.255
749	15.035		-0.268			10.211			-0.94
748	15.049		-0.242			10.023			-0.335
747	15.371		-1.872			10.069			1.01
746	15.99		-0.551			9.533			0.36
745	15.544		-0.222			9.185			0.772
744	14.943		-3.67			8.798			-0.166
743	15.595		-2.011			10.004			0.152
742	15.371		-1.242			9.389			1.015
741	15.506		-1.298			9.027			0.147
740	15.418		0.654			9.794			-0.211
739	15.193		0.006			9.905			-0.796
738	15.558		-0.692			9.686			-0.895
737	15.488		0.72			10.562			-0.662
736	15.593		1.297			9.891			0.137
735	15.868		1.048			10.032			0.082
734	16.02		-0.063			10.514			-0.191
733	15.49		1.25			10.552			-0.012
732	15.397		2.101			10.032			0.549
731	15.14		0.701			10.431			0.638
730	14.572		1.248			10.564			-0.161
729	14.336		-1.614			10.96			-0.717
728	14.231		0.684			10.626			0.588
727	14.862		-0.599			10.548			0.107
726	14.887		-0.855			10.647			-0.474
725	15.291		-2.884			11.135			-0.206
724	15.406		-0.064			10.101			-0.126
723	15.354		-0.545			10.353			-0.181
722	14.925		1.237			10.318			-0.245
721	14.82		-0.483			10.09			-0.642
720	14.53		-1.595			9.822			-0.33
719	15.147		-2.967			9.509			-0.503
718	15.527		-3.014			9.995			-0.637
717	15.399		0.045			10.033			-0.364
716	15.1		-2.165			10.105			-0.394
715	14.694		1.685			9.804			-0.662
714	15.28		1.688			10.023			-2.111
713	14.932		1.368			9.859			-1.148
712	15.252		-0.19			9.218			-0.717
711	15.443		1.224			9.914			-0.692
710	15.193		0.195			9.495			-0.201
709	15.448		1.554			10.046			-0.349
708	14.577		0.801			9.715			0.216
707	14.57		-4.492			9.885			-0.816
706	14.558		-1.994			9.238			0.698
705	14.282		1.071			9.528			0.698
704	14.28		1.833			9.49			-0.722
703	14.374		1.465			10.003			0.395
702	14.448		0.47			9.69			-0.037
701	14.453		-0.68			10.181			0.464
700	14.518		-4.348			10.092			-1.114
699	14.462		1.802			9.744			-0.866
698	14.226		1.022			9.592			-0.657
697	13.878		0.832			10.316			-1.079
696	14.058		2.37			9.416			-0.429
695	13.871		-0.876			9.818			0.271
694	14.219		1.364			10.378			-0.786
693	14.453		-1.569			9.523			-0.702
692	14.549		0.177			9.333			-0.89
691	14.535		-1.151			9.922			-0.761
690	14.542		-0.923			9.843			-2.364
689	14.434		0.315			9.981			-1.158
688	14.936		-1.472			9.405			-0.88
687	14.897		-2.371			9.75			-0.652
686	14.773		0.625			10.416			-0.672
685	14.488		1.11			8.566			1.119
684	14.551		-4.112			11.004			0.995
683	15.142		0.994			10.148			0.291
682	15.553		-3.18			10.005			0.335
681	16.041		-1.365			9.86			0.484
680	15.922		-1.396			9.851			0.881
679	15.485		-0.696			9.784			0.837
678	15.941		-0.757			9.979			0.36
677	15.439		2.076			9.684			1.184
676	15.009		0.222			10.357			0.837
675	15.42		-2.014			10.328			0.861
674	15.688		1.985			9.989			1.328
673	15.252		2.675			10.052			0.375
672	15.588		-0.018			10.082			0.142
671	16.039		-0.959			10.314			0.703
670	15.95		-2.733			9.549			0.216
669	15.688		0.088			9.267			0.668
668	15.35		-1.049			9.629			-0.022
667	15.338		0.301			10.174			-0.379
666	14.595		1.644			10.131			0.42
665	14.427		0.559			9.396			-0.042
664	14.217		1.328			8.979			-1.139
663	13.923		-1.809			9.146			-1.173
662	14.353		0.644			8.387			-1.084
661	14.446		-3.283			9.043			-0.751
660	14.892		-0.826			8.561			-0.836
659	14.602		0.078			9.444			-0.578
658	14.782		1.207			9.484			-0.667
657	14.932		1.798			9.834			-0.186
656	15.31		0.105			9.51			-0.027
655	15.359		-1.249			8.938			-0.26
654	15.777		0.963			9.731			-1.407
653	14.815		0.088			9.219			-1.496
652	15.329		-1.52			9.525			-0.558
651	14.778		1.468			8.951			-0.627
650	15.193		-1.705			9.145			-0.89
649	14.479		-0.229			9.633			-1.124
648	14.388		-1.552			8.881			-1.134
647	14.479		-1.038			9.412			-0.389
646	15.016		-2.68			9.906			-0.811
645	15.27		-0.981			10.48			-0.34
644	15.184		-2.924			9.715			-0.737
643	14.682		-0.349			9.485			-0.598
642	14.418		-1.549			9.572			0.385
641	13.993		-2.921			10.152			-0.181
640	14.04		-6.797			9.641			-0.861
639	14.18		-4.906			10.29			-0.841
638	14.558		-2.831			10.063			-0.538
637	14.684		-5.964			10.095			-0.166
636	14.715		-3.059			9.763			-0.9
635	14.637		-2.122			10.036			-1.282
634	14.939		-1.288			10.059			-0.543
633	14.836		0.743			10.33			-1.416
632	14.57		0.168			9.926			-1.198
631	14.703		0.157			9.539			-1.322
630	14.941		0.922			9.53			-0.548
629	14.978		1.733			9.533			-0.538
628	15.072		-2.26			9.131			-0.771
627	14.747		-3.202			9.866			-1.942
626	15.184		-0.595			9.723			-1.689
625	15.868		-0.053			9.79			-0.826
624	15.383		0.137			9.483			-0.647
623	15.191		-7.287			9.995			-1.456
622	14.57		-0.808			9.831			-0.161
621	14.929		0.355			9.18			-0.374
620	15.766		-1.809			9.889			-1.014
619	15.551		-0.34			9.271			1.04
618	15.361		1.576			8.493			0.648
617	15.366		1.684			9.205			-0.201
616	15.221		1.762			9.92			-0.747
615	15.572		-2.007			9.116			-0.781
614	15.885		-0.308			9.647			-0.434
613	15.91		0.118			10.418			-0.776
612	15.534		1.076			9.539			-1.223
611	15.044		0.579			9.127			-0.871
610	14.939		-3.944			9.6			-1.625
609	14.481		-1.334			9.82			-0.811
608	14.873		-3.147			9.715			-1.565
607	15.182		-2.747			10.122			-1.794
606	15.959		1.738			9.734			-1.501
605	16.167		1.165			10.291			-1.506
604	15.824		0.947			10.305			-2.081
603	15.98		0.062			9.628			-2.429
602	15.674		1.548			9.817			-2.121
601	15.446		0.798			10.182			-2.91
600	15.347		-1.052			10.122			-2.062
599	15.212		0.493			10.008			-1.923
598	14.983		-2.655			9.289			-2.191
597	15.077		-0.632			10.07			-1.779
596	14.75		-5.42			10.334			-2.067
595	14.672		1.678			10.507			-1.461
594	14.866		2.39			9.825			-1.436
593	15.06		2.584			9.797			-1.193
592	14.757		1.089			9.636			-2.28
591	15.123		0.65			10.18			-1.491
590	14.43		-1.507			10.134			-1.278
589	14.614		-4.429			9.927			-0.965
588	14.771		0.578			9.991			-0.364
587	15.319		0.119			10.215			-1.044
586	15.368		-0.116			9.945			-1.228
585	15.175		1.147			9.376			-1.605
584	14.817		1.067			9.588			-1.144
583	14.726		0.463			8.786			-0.975
582	14.551		-3.476			9.315			-0.647
581	14.651		-0.079			9.446			-1.332
580	15.158		-0.052			9.408			-1.01
579	14.934		-2.891			9.475			-1.109
578	15.352		-1.362			9.623			-0.191
577	14.96		-1.367			9.642			-1.124
576	14.773		0.104			9.816			-0.871
575	14.53		0.132			8.889			-1.481
574	14.483		-2.178			10.052			-1.461
573	14.663		-3.509			10.476			-1.645
572	14.469		-3.301			9.922			-0.99
571	14.437		-2.22			9.905			-1.029
570	14.677		-5.68			9.226			-0.747
569	14.184		0.568			9.399			-0.419
568	14.376		0.17			9.637			-1.218
567	14.49		0.953			9.771			-1.57
566	14.778		-0.331			9.337			-1.665
565	14.584		-0.059			9.179			-1.729
564	14.864		0.049			9.564			-1.605
563	14.612		-1.638			10.53			-1.625
562	14.521		-1.348			10.411			-2.632
561	14.953		-2.729			9.645			-1.441
560	14.612		0.673			9.524			-0.697
559	15.165		-0.784			10.332			-0.538
558	15.56		1.65			9.552			-0.414
557	14.551		0.929			9.756			-0.642
556	14.425		1.749			9.302			-0.92
555	14.399		2.225			8.999			-1.109
554	15.009		-2.353			9.104			-1.297
553	14.551		-1.604			9.635			-2.225
552	14.245		-0.784			8.786			-1.739
551	14.56		0.559			8.768			-2.22
550	14.995		0.785			8.348			-2.349
549	14.948		-0.106			8.926			-2.945
548	15.429		-0.782			8.973			-2.116
547	15.555		-3.691			8.861			-2.057
546	15.761		-5.95			8.751			-2.235
545	15.343		-2.106			8.524			-3.069
544	15.298		-2.421			8.539			-2.508
543	14.974		-2.444			8.989			-2.771
542	14.857		0.872			8.132			-2.032
541	14.691		-3.963			9.3			-2.29
540	14.887		-0.943			9.259			-2.037
539	15.035		-1.72			9.276			-1.893
538	15.224		-2.64			10.015			-2.121
537	15.581		-3.096			9.088			-2.573
536	15.838		-4.768			8.669			-1.526
535	15.593		0.319			10.375			-0.836
534	15.147		-0.138			10.086			-0.27
533	14.911		0.037			10.085			-0.315
532	15.025		-1.187			10.007			-0.756
531	14.607		0.8			10.127			-1.134
530	14.644		1.735			9.989			-0.474
529	14.82		0.07			9.917			-1.109
528	14.796		-1.634			9.728			-2.26
527	14.932		-0.228			9.68			0.072
526	14.936		0.231			9.754			-0.905
525	14.754		0.049			9.77			-0.201
524	15.319		-1.521			9.734			0.459
523	15.163		-0.632			9.402			0.554
522	15.471		-2.894			8.681			-0.364
521	15.691		0.498			10.075			-0.33
520	15.506		-2.275			9.571			-0.657
519	15.471		-0.195			9.754			-0.866
518	15.044		0.566			9.969			-0.503
517	15.45		0.115			9.814			-0.632
516	15.168		1.879			9.255			-1.114
515	15.158		2.364			9.314			-0.742
514	15.004		-0.043			9.696			-1.218
513	15.102		2.091			10.023			-0.781
512	14.885		-0.492			9.754			-0.523
511	15.481		-0.04			10.066			-0.652
510	14.787		-1.562			10.321			-0.027
509	14.563		0.172			9.785			-0.101
508	15.436		-1.03			9.921			-0.369
507	14.827		-2.569			9.375			-0.816
506	14.957		-0.722			9.526			0.087
505	14.694		-0.951			9.588			0.236
504	14.542		-0.256			10.438			-0.861
503	15.149		-1.036			10.543			1.105
502	15.324		-2.096			10.456			-1.044
501	15.093		-3.113			11.204			-0.404
500	15.242		-2.619			10.636			-0.151
499	14.827		-1.808			10.632			0.157
498	14.381		-3.894			10.207			-0.091
497	15.006		-1.05			10.164			0.182
496	15.235		-3.076			11.658			-0.419
495	14.285		-4.174			10.812			-0.533
494	15.238		-0.851			11.31			0.956
493	14.595		-4.294			11.307			-0.211
492	14.493		-4.095			10.836			-0.885
491	14.649		-0.492			10.923			-0.622
490	14.761		1.314			10.082			-1.074
489	15.492		-0.303			9.94			-0.593
488	15.959		-2.491			9.903			-1.014
487	15.401		-2.576			10.501			-1.431
486	15.434		-3.14			9.745			-1.898
485	15.14		-0.977			9.936			0.182
484	15.436		-3.305			9.67			-1.332
483	15.684		-2.516			9.824			-1.585
482	15.614		0.317			9.493			-1.898
481	15.607		0.242			9.282			-0.101
480	15.609		0.882			9.063			0.033
479	15.497		-3.266			9.432			-1.178
478	15.546		-0.059			10.066			-1.6
477	15.357		-1.148			10.008			-0.692
476	15.149		1.348			9.351			-0.756
475	15.214		0.733			9.395			-0.533
474	14.651		0.897			9.549			-0.295
473	14.946		-0.297			9.861			0.291
472	14.516		0.311			9.445			-0.33
471	14.378		1.54			9.121			-0.24
470	14.495		0.197			9.52			-0.22
469	14.035		0.648			9.538			-0.558
468	14.315		-0.957			9.413			-0.742
467	14.689		2.003			9.528			-1.099
466	14.911		-0.64			9.931			-0.315
465	15.406		1.252			9.558			-0.811
464	15.259		0.025			9.414			-0.935
463	15.534		0.677			9.692			-0.543
462	15.523		1.017			9.529			-1.273
461	15.177		-0.085			10.147			-0.915
460	14.978		-0.288			9.517			-0.121
459	15.298		1.693			9.25			-0.722
458	14.752		1.024			10.404			-0.533
457	14.894		0.713			10.668			-0.364
456	14.49		-1.303			10.615			-0.24
455	14.899		1.612			10.102			-0.086
454	14.981		0.582			9.746			-0.32
453	15.156		-1.515			11.32			-0.335
452	14.964		-0.948			10.982			-1.074
451	15.002		-0.024			11.405			-1.054
450	15.284		-1.629			11.74			-0.012
449	15.284		0.671			11.737			-1.233
448	15.418		1.344			10.659			-0.642
447	15.121		-1.311			10.938			0.107
446	14.717		-0.551			11.125			-0.841
445	15.011		-2.683			10.861			-1.044
444	15.31		-2.43			10.812			0.296
443	14.96		-1.027			10.197			0.32
442	14.458		0.535			10.444			0.42
441	14.413		-0.558			9.898			-0.126
440	14.388		-1.054			9.655			-0.459
439	14.161		-3.926			9.646			-1.079
438	14.374		-0.374			10.167			-0.151
437	14.514		-3.449			10.061			-0.374
436	14.852		-0.995			10.004			-1.426
435	15.595		1.349			10.71			-0.469
434	15.198		0.529			10.756			-0.285
433	15.238		1.462			10.341			-0.359
432	15.375		-1.744			10.52			-0.751
431	15.193		-1			10.945			-1.372
430	15.058		-0.549			11.869			-0.027
429	14.843		-4.42			12.027			-0.558
428	14.399		0.514			10.809			-1.238
427	15.191		-3.355			10.594			-2.191
426	15.238		-4.318			10.464			-1.789
425	14.88		-3.262			10.272			-1.193
424	14.71		-2.717			9.801			-0.657
423	14.437		-4.346			10.295			-0.846
422	14.605		-3.936			10.036			-1.024
421	14.887		-3.409			8.93			-0.707
420	14.651		-2.892			10.118			-0.176
419	15.112		-0.822			10.713			-0.88
418	15.091		-1.332			9.923			-0.756
417	14.696		0.217			9.51			-0.851
416	15.649		-2.495			9.939			-0.766
415	15.354		-0.944			9.69			-1.923
414	15.52		0.021			9.767			-1.764
413	15.609		-1.38			9.166			-1.153
412	15.095		-0.682			10.16			-0.518
411	14.855		-2.196			10.579			-0.965
410	14.579		-4.15			10.968			-1.168
409	14.486		-2.104			10.867			-0.384
408	14.36		-1.199			10.746			-0.454
407	14.558		-1.209			11.294			-0.419
406	14.268		-0.891			11.783			-0.876
405	14.245		-1.364			10.314			-0.419
404	14.133		-3.383			11.392			-0.28
403	14.35		1.15			11.329			-1.034
402	14.941		1.572			11.373			-0.742
401	14.621		1.227			11.609			-1.218
400	14.894		-0.122			11.61			-0.488
399	14.918		-1.276			10.81			-1.689
398	15.263		-1.272			10.512			-1.516
397	16.223		-0.902			9.909			-1.397
396	15.735		-1.604			9.967			-1.967
395	15.119		-0.316			10.28			-1.332
394	15.336		0.983			9.842			-1.709
393	14.581		-3.058			9.984			-1.56
392	14.75		1.96			10.225			-1.57
391	15.074		2.444			9.903			-1.054
390	14.806		0.274			10.848			-1.848
389	15.016		-1.859			10.339			-1.704
388	15.219		-0.777			9.89			-1.461
387	15.693		-3.31			9.323			-0.285
386	14.978		1.189			9.447			-0.801
385	15.016		-1.646			9.9			-0.608
384	15.02		-0.514			9.323			-1.238
383	14.96		-2.008			9.177			-0.608
382	14.719		-4.18			9.2			-0.712
381	14.981		-5.832			9.187			-1.332
380	15.126		-1.371			9.533			-0.26
379	14.88		0.225			9.318			-0.702
378	14.992		-1.444			9.968			-1.109
377	15.053		0.429			9.846			-0.285
376	15.016		1.387			9.829			-2.503
375	14.446		1.673			9.817			-0.196
374	14.409		-2.674			10.052			-0.682
373	14.705		0.055			10.303			-0.275
372	14.75		1.107			9.209			-0.697
371	14.745		1.774			9.358			-0.608
370	14.813		-3.508			9.61			-1.451
369	14.913		-1.469			9.342			-1.977
368	14.803		-2.308			9.996			-1.446
367	15.179		-1.444			9.705			-0.915
366	15.151		-1.723			9.663			-0.756
365	15.086		-0.192			9.697			-1.67
364	14.943		0.707			10.285			-0.945
363	14.296		-0.471			9.663			-0.483
362	14.57		-1.156			9.831			-0.796
361	15.114		0.243			10.05			-0.89
360	15.107		0.655			10.086			-1.516
359	14.719		-3.883			10.216			-1.511
358	14.647		0.299			9.598			-1.585
357	14.808		0.536			9.689			-1.903
356	14.871		-1.629			9.514			-1.719
355	14.668		-1.332			9.588			-0.975
354	14.593		-0.929			9.467			-1.307
353	14.453		-1.219			9.729			-1.153
352	14.247		-1.13			9.592			-1.511
351	14.161		-3.276			9.633			-1.342
350	14.184		-0.543			8.987			-0.89
349	14.413		-2.585			9.202			-1.357
348	14.392		0.117			9.238			0.167
347	14.399		-0.183			9.055			0.375
346	14.479		-1.769			8.772			0.177
345	14.969		-4.248			8.857			-0.727
344	15.116		-0.537			8.73			-1.059
343	15.186		-3.039			8.655			-1.049
342	15.056		-2.137			9.058			-0.786
341	15.6		-0.248			8.853			-0.672
340	15.364		-3.898			8.652			-1.397
339	15.439		-2.8			8.97			-1.332
338	14.803		-3.458			9.609			-1.65
337	14.96		-2.249			9.178			-1.208
336	14.887		-0.422			8.775			-1.218
335	15.06		-2.682			9.295			-1.784
334	15.142		-0.316			9.698			-1.213
333	15.462		-2.556			9.743			-2.047
332	15.203		-0.333			9.648			-0.985
331	14.997		1.281			9.186			-0.761
330	14.948		-5.483			9.597			-1.158
329	14.637		-0.133			8.613			-1.521
328	14.715		-0.399			9.561			-1.019
327	14.943		-1.802			9.205			-1.858
326	14.754		-0.886			9.079			-1.496
325	14.841		-0.697			9.137			-0.216
324	14.934		-0.212			9.015			0.464
323	14.885		-1.169			9.188			-0.925
322	14.773		-2.423			9.628			-0.568
321	14.95		-2.905			9.715			-0.697
320	14.712		-1.394			9.607			-0.677
319	15.109		-2.021			9.304			-0.404
318	15.513		-1.884			9.581			-0.429
317	15.249		-0.25			9.539			-0.369
316	14.871		-1.941			9.147			-1.054
315	14.922		-0.974			9.732			-0.206
314	14.857		-1.504			9.477			0.167
313	14.731		-1.571			10.185			-0.508
312	14.381		-2.595			9.89			-0.349
311	14.887		-0.457			9.317			-0.359
310	14.63		-2.008			9.398			-0.627
309	14.668		-1.834			9.443			-1.243
308	15.151		-1.535			9.233			-1.144
307	15.182		-0.887			8.984			-0.429
306	15.583		0.045			9.078			-0.454
305	15.502		-1.417			9.217			-0.568
304	15.476		1.181			8.617			-0.156
303	15.656		-0.299			9.287			-0.22
302	15.707		-3.097			9.291			-0.866
301	15.497		-1.644			9.919			0.087
300	15.303		-1.033			9.675			-0.538
299	15.114		-0.416			10.242			-1.024
298	14.845		-0.62			10.242			-0.732
297	14.654		-0.388			10.184			0.186
296	14.343		-0.291			10.181			0.256
295	14.098		-1.651			10.141			0.077
294	14.135		-1.034			9.742			-0.796
293	14.023		0.029			9.561			-0.89
292	14.219		-1.549			10.192			0.296
291	14.194		0.618			9.987			-0.002
290	14.124		-3.625			9.468			-0.563
289	14.336		1.257			10.019			0.241
288	14.322		-0.024			10.747			-0.459
287	14.236		1.736			10.616			-0.156
286	14.724		-0.146			10.308			-0.057
285	14.637		-0.25			10.091			-0.077
284	14.577		0.525			10.814			-0.012
283	15.1		0.379			10.282			0.003
282	15.207		1.657			9.659			1.164
281	14.665		-2.011			9.243			0.603
280	14.759		2.557			9.376			0.003
279	14.374		1.506			9.084			0.211
278	14.458		0.101			8.936			0.623
277	14.191		0.014			9.004			0.747
276	14.096		-2.668			8.981			0.976
275	14.156		-0.563			8.872			0.435
274	14.381		-3.819			8.919			-0.553
273	14.439		-2.575			9.411			-0.548
272	14.743		0.386			9.507			-0.727
271	15.17		-2.045			9.573			-1.069
270	15.345		2.308			8.246			-1.526
269	15.074		1.227			9.207			-1.987
268	15.182		-4.398			8.739			-1.56
267	15.205		-0.439			9.429			-0.796
266	15.14		1.015			10.139			-1.372
265	15.06		1.796			9.15			-0.831
264	15.126		2.018			10.26			-1.01
263	14.691		2.048			10.194			-0.945
262	14.425		0.921			10.416			0.018
261	14.71		2.063			9.825			-0.131
260	14.745		-1.084			9.704			-1.198
259	14.376		0.973			9.862			-0.697
258	14.441		3.146			9.403			-1.129
257	14.434		0.617			9.935			0.062
256	14.264		0.345			9.984			-0.166
255	14.362		-0.106			9.804			0.325
254	14.381		-1.55			9.255			0.003
253	14.348		-0.022			9.953			-0.22
252	14.586		-2.082			10.423			0.216
251	14.581		-0.109			9.915			-1.357
250	15.039		-0.304			9.769			0.643
249	15.359		-2.514			9.682			1.258
248	15.551		0.706			10.037			0.936
247	15.516		2.549			9.214			0.519
246	15.317		1.901			10.021			0.896
245	15.268		2.297			9.964			1.268
244	15.133		0.466			9.907			-0.116
243	15.056		0.304			9.461			0.469
242	14.658		3.395			9.834			1.174
241	14.857		-0.217			9.845			0.152
240	15.368		3.03			9.947			0.881
239	16.114		0.925			9.824			1.11
238	15.665		0.217			9.384			0.201
237	15.488		-0.895			8.602			-0.265
236	15.387		-0.358			8.564			0.985
235	15.969		0.135			9.325			1.397
234	15.516		2.182			9.462			0.608
233	16.111		0.043			9.316			-0.106
232	16.079		-0.151			9.534			-0.697
231	15.614		1.817			9.185			-0.22
230	15.628		-0.027			9.295			-0.588
229	15.331		1.714			10.159			-0.111
228	15.053		0.076			9.177			-0.037
227	15.088		0.827			9.893			-0.111
226	15.189		0.459			10.392			0.742
225	15.161		1.473			10.079			0.41
224	15.226		0.008			9.669			-0.235
223	15.156		-2.348			10.007			-1.039
222	14.955		-1.232			9.4			-0.156
221	14.873		-3.709			9.364			-1.044
220	14.619		-3.402			9.789			-0.895
219	14.817		-1.58			10.137			-1.312
218	14.747		-0.861			9.412			-0.354
217	14.974		-1.835			10.103			0.335
216	14.948		0.628			10.215			-0.23
215	14.729		-1.071			10.299			-0.191
214	14.542		0.003			10.92			0.152
213	14.518		-1.315			10.683			0.365
212	15.095		-1.759			10.597			0.211
211	15.207		-3.62			10.017			-0.24
210	15.177		-0.393			10.828			-0.687
209	15.562		-3.281			10.151			0.028
208	15.836		0.541			10.127			-1.908
207	15.418		-2.381			10.234			-1.734
206	14.918		2.048			10.452			-1.431
205	14.838		0.466			10.307			-1.332
204	14.467		-4.525			10.403			-0.866
203	14.266		0.776			9.906			-1.144
202	14.771		-0.718			9.556			-0.583
201	14.563		-1.264			10.092			-0.444
200	14.476		0.023			9.676			-0.434
199	15.586		-2.881			9.834			0.33
198	15.175		-0.346			9.902			0.216
197	15.105		-3.435			9.836			1.462
196	14.542		-2.405			10.152			1.244
195	14.296		-0.188			9.545			1.08
194	14.649		-2.816			10.132			0.494
193	14.642		1.119			9.802			0.449
192	14.785		-0.472			10.308			0.524
191	14.953		-0.553			10.262			0.514
190	14.892		-2.887			10.517			0.162
189	15.268		-0.163			10.055			0.226
188	15.502		-0.099			10.176			-0.483
187	15.794		1.612			9.773			-0.9
186	15.49		-0.468			10.19			-0.712
185	14.726		-0.56			9.965			-0.037
184	14.862		-2.83			9.803			-0.285
183	14.588		-0.324			10.299			0.102
182	14.572		-3.832			10.894			0.261
181	14.668		-1.949			10.11			-0.017
180	14.684		-4.532			10.767			-1.198
179	15.109		-0.475			10.575			-1.878
178	15.319		-0.508			10.366			-1.421
177	15.242		-3.184			9.296			-1.426
176	15.051		-2.748			9.17			-1.029
175	15.312		-2.25			9.779			-0.995
174	15.511		-4.653			10.003			-1.402
173	15.562		-2.878			10.206			-1.208
172	15.301		0.579			9.906			-1.461
171	14.537		-0.721			10.098			-1.119
170	15.063		-3.674			10.769			-1.054
169	14.694		-0.044			10.264			-1.377
168	14.745		0.022			9.798			-0.776
167	14.743		-1.662			10.345			-0.791
166	14.759		-3.627			9.755			-1.158
165	14.362		-3.235			10.116			-1.044
164	14.834		-2.927			10.031			-0.88
163	15.798		-0.962			9.942			-0.657
162	16.373		-2.423			10.039			-1.655
161	16.137		0.113			10.854			-0.771
160	16.163		-2.516			10.6			-0.92
159	15.756		-2.215			10.17			-1.173
158	15.207		-2.529			10.215			-0.895
157	14.871		-1.104			10.144			-0.866
156	14.999		0.886			10.027			-1.456
155	14.88		-3.304			10.279			-1.163
154	15.235		-0.23			9.751			-0.444
153	15.039		0.719			9.461			-0.26
152	15.336		-0.832			9.419			-0.93
151	15.254		-3.83			9.46			-0.315
150	15.801		-2.538			9.325			-1.218
149	16.237		1.074			9.901			-0.474
148	15.572		-1.908			9.754			-0.95
147	15.455		0.859			9.776			0.951
146	15.128		-1.531			9.716			-0.925
145	15.775		0.564			9.882			-0.086
144	15.623		-0.994			10.45			-0.737
143	15.2		-6.884			10.997			-0.047
142	14.936		-0.841			11.263			-0.206
141	15.137		0.045			10.986			0.097
140	14.985		-0.595			11.239			0.489
139	14.999		-0.863			11.502			0.33
138	15.238		-1.252			10.528			-0.99
137	15.221		-0.379			10.705			-0.22
136	15.242		-0.242			10.171			-0.93
135	14.794		0.32			9.675			0.226
134	14.451		-4.104			10.219			0.365
133	14.698		-0.473			10.445			-0.459
132	14.668		-4.292			11.024			-0.528
131	14.99		0.141			10.076			0.082
130	14.743		1.682			9.342			-1.188
129	14.56		0.567			9.97			0.241
128	14.56		-1.497			9.854			-0.424
127	15.049		-0.909			9.983			-0.171
126	14.679		-0.967			9.73			-0.503
125	14.736		-0.1			9.531			-0.22
124	14.698		0.213			9.348			-0.985
123	14.778		-1.636			10.162			-1.079
122	14.549		-0.241			10.203			0.013
121	14.623		1.9			9.886			-0.235
120	14.509		0.852			9.997			0.246
119	14.378		-1.595			10.088			-0.603
118	14.549		0.985			10.52			-0.876
117	14.558		0.694			9.912			0.127
116	14.593		0.509			10.427			-0.34
115	14.131		0.59			10.055			0.177
114	14.395		-0.554			9.719			0.737
113	14.224		0.189			10.586			-1.059
112	14.303		-0.15			9.95			-0.335
111	14.752		1.092			9.817			-0.146
110	15.004		-4.424			10.427			-0.196
109	15.291		-0.141			10.161			-0.96
108	15.303		0.107			10.213			0.052
107	15.686		0.66			10.563			-0.345
106	16.025		0.251			10.189			-0.518
105	15.91		0.632			9.749			0.817
104	15.677		0.079			10.027			-0.28
103	15.427		-1.819			9.986			0.092
102	15.506		-1.954			9.475			0.38
101	15.086		-2.152			9.617			0.861
100	14.855		0.642			9.914			-1.01
99	15.107		1.173			10.033			-0.791
98	14.85		-1.536			9.777			-0.637
97	14.623		-0.5			9.855			-0.166
96	15.119		0.429			10.007			-0.761
95	15.219		0.134			9.595			-1.545
94	15.198		-2.461			10.209			-2.196
93	15.52		-1.472			9.9			-0.781
92	15.98		0.476			10.161			0.112
91	15.469		-0.498			9.161			0.157
90	15.481		0.244			10.117			-0.98
89	15.224		-2.828			9.884			1.124
88	15.572		-2.135			9.923			1.139
87	15.107		-0.053			9.484			0.231
86	15.205		-0.28			9.322			0.082
85	14.806		0.464			8.958			0.023
84	14.32		-0.687			9.445			-1.476
83	14.619		-0.366			9.664			-0.707
82	14.119		-0.352			9.525			-0.285
81	14.182		-4.785			9.959			-1.655
80	14.425		0.95			9.08			-1.188
79	14.236		0.659			9.477			-0.955
78	14.416		-4.361			9.322			-1.139
77	14.446		-0.437			9.151			-0.895
76	14.736		0.897			8.965			-0.429
75	14.355		-2.35			9.784			-0.027
74	14.446		-2.438			9.19			-0.593
73	14.687		-0.248			10.127			0.276
72	14.708		-2.066			9.749			0.087
71	14.773		-0.086			10.146			-0.379
70	14.453		-2.332			10.341			-0.017
69	14.451		0.586			9.843			0.266
68	14.843		-1.872			9.539			0.673
67	14.383		0.516			9.608			1.556
66	14.402		0.292			9.752			0.643
65	14.679		0.874			9.917			-0.126
64	14.792		0.673			10.345			0.048
63	15.044		0.137			10.431			-0.077
62	14.556		-2.253			9.994			0.048
61	14.539		-0.852			9.889			1.338
60	14.306		0.464			9.29			0.509
59	14.416		-3.575			10.105			-0.851
58	14.493		-0.597			9.488			0.395
57	14.628		-2.098			10.062			-1.397
56	14.588		-1.961			9.841			-0.588
55	14.226		-0.272			10.192			1.189
54	14.168		0.604			10.013			0.186
53	14.056		0.041			10.372			0.643
52	13.867		-4.144			10.623			0.742
51	13.981		-0.765			10.131			0.405
50	13.857		-1.741			10.678			0.36
49	14.051		-6.183			10.802			-0.091
48	13.82		-0.514			10.24			1.397
47	14.089		0.028			10.163			1.958
46	14.084		-4.814			10.268			1.353
45	14.367		-1.186			9.958			0.33
44	14.558		0.851			9.934			0.504
43	14.353		1.673			10.438			0.683
42	14.577		1.087			10.161			1.08
41	14.31		0.147			10.26			0.41
40	14.514		2.078			9.782			0.191
39	14.757		1.236			10.147			1.333
38	15.032		-1.635			10.54			0.717
37	14.88		0.246			10.733			0.484
36	15.013		-4.846			10.525			-0.062
35	14.621		2.21			10.83			1.174
34	15.168		1.284			10.805			-0.027
33	15.165		1.619			10.753			-0.503
32	14.999		0.942			10.964			-0.747
31	15.088		-0.183			10.614			-1.987
30	15.072		-0.407			10.078			-1.461
29	15.277		-3.434			10.623			-2.603
28	15.245		-0.105			10.771			-1.114
27	15.254		-1.78			10.957			-0.93
26	15.004		-0.328			10.21			-1.585
25	15.252		0.075			10.079			-1.163
24	15.305		-3.494			9.972			-2.364
23	15.203		0.512			10.235			-1.302
22	15.102		-1.79			9.793			-1.66
21	15.572		-0.384			9.703			-1.898
20	15.464		-0.89			9.751			-1.923
19	15.231		-0.114			9.889			-1.139
18	15.336		-0.83			9.178			-0.101
17	15.455		2.227			9.591			0.499
16	15.469		-4.691			10.155			-1.977
15	15.415		-0.541			9.801			0.048
14	16.191		0.524			9.667			0.003
[truncated: 14 more rows]
